# Supplementary material for: Novel Xanthene-1,8-dione Derivatives Containing the Benzylic Ether Tail as Potent Cytotoxic Agents: Design, Synthesis, In Vitro, and In Silico Studies
Source: Hindawi journal article supplement (doi:10.1155/2024/6612503), 2024-01-05
Supplement: f1 [file 6612503.f1.pdf]

## Supplementary Information Data

### 4a Spectra

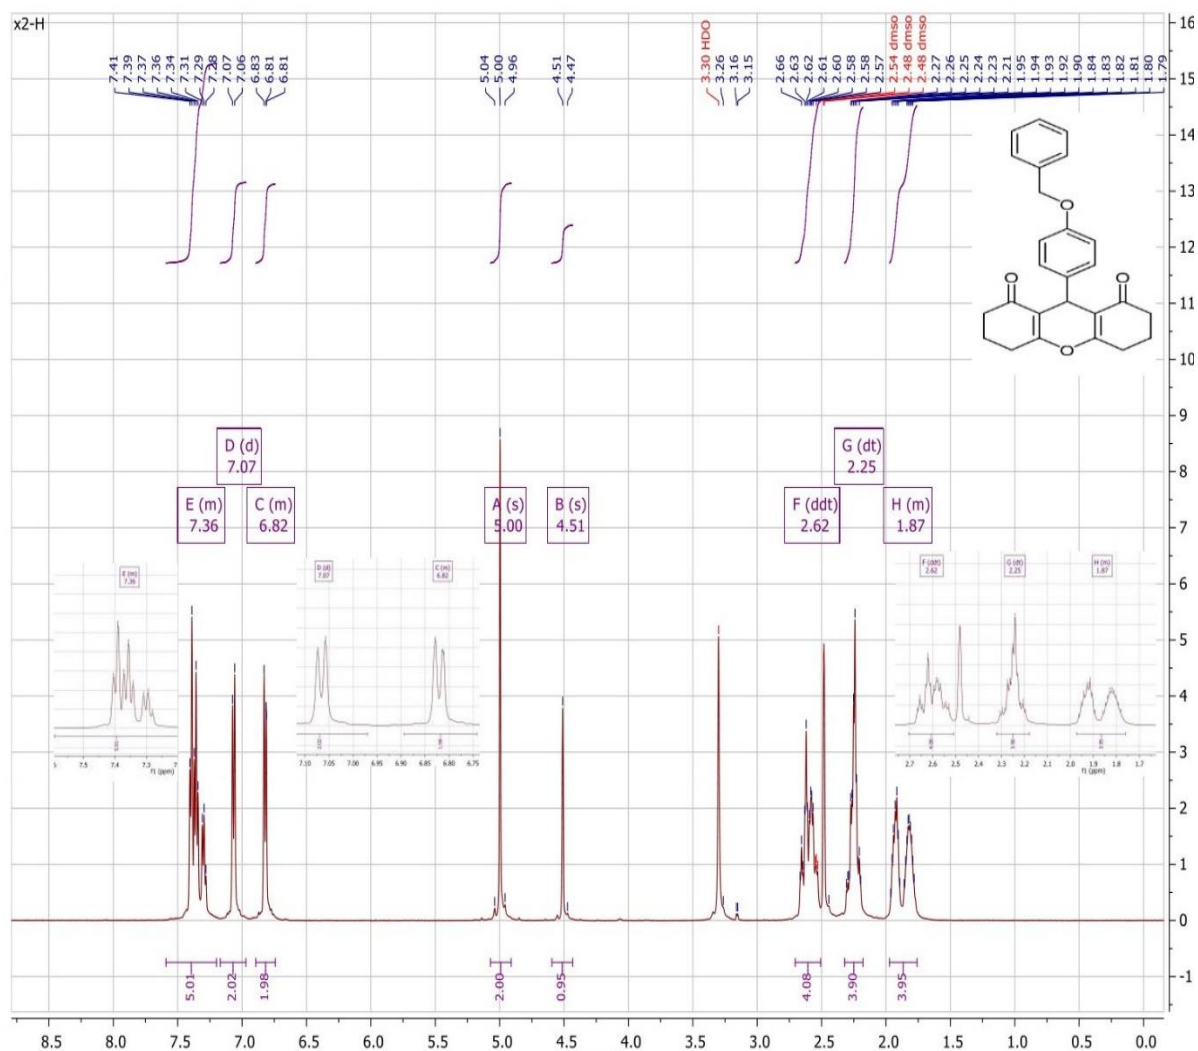

***<sup>1</sup>H-NMR spectrum of 4a***

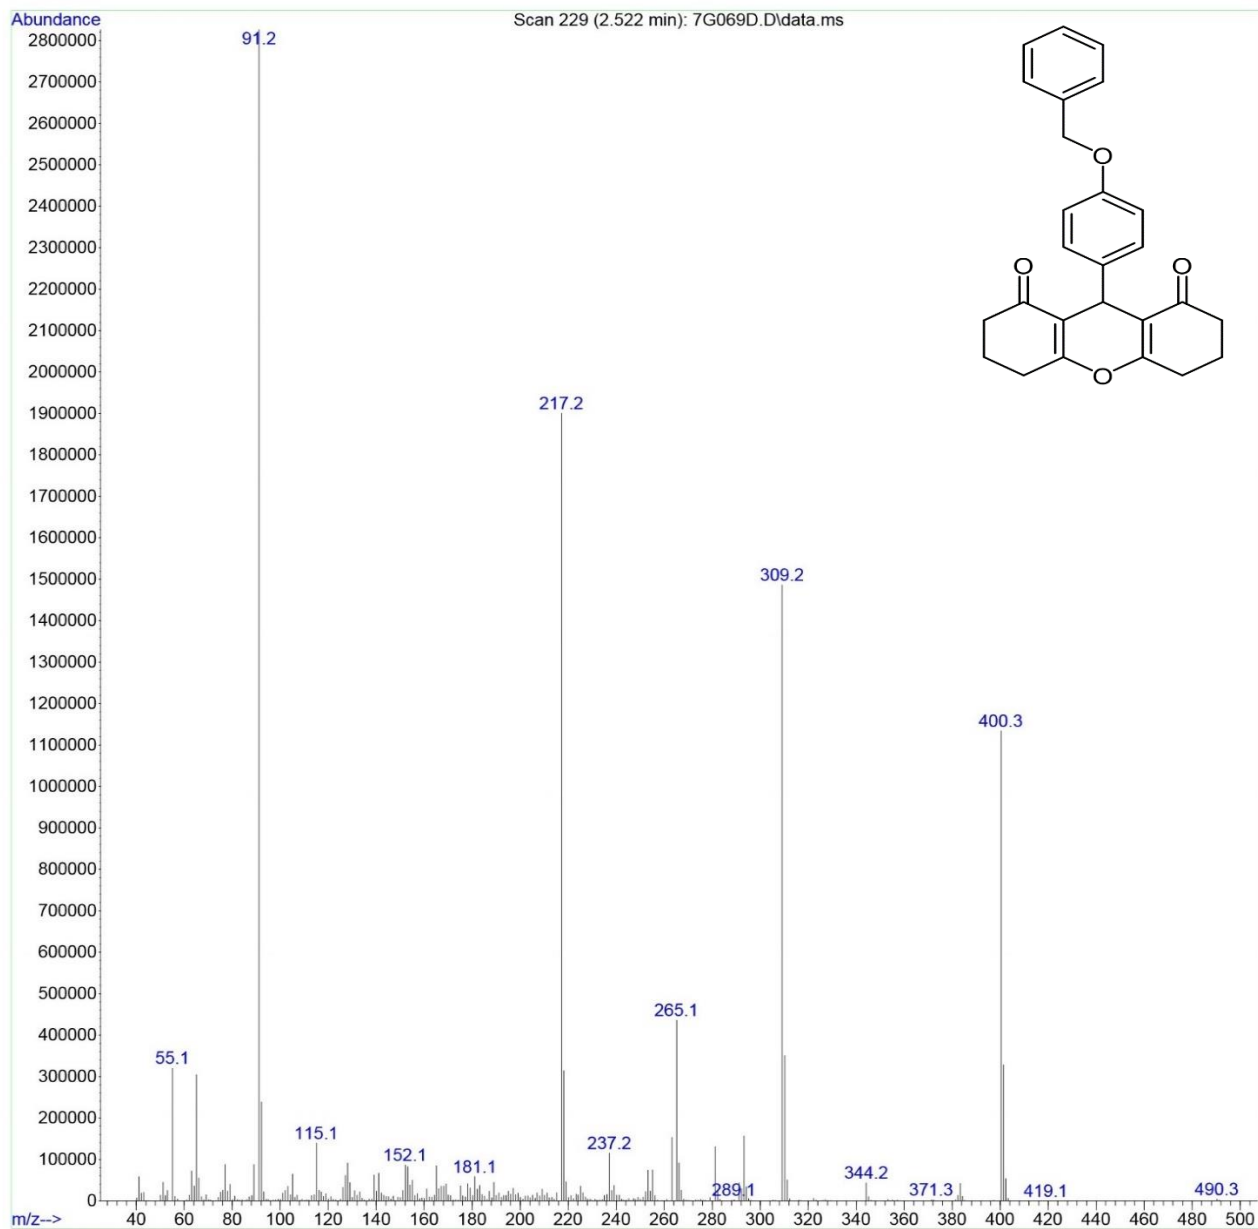

*Mass spectrum of 4a*

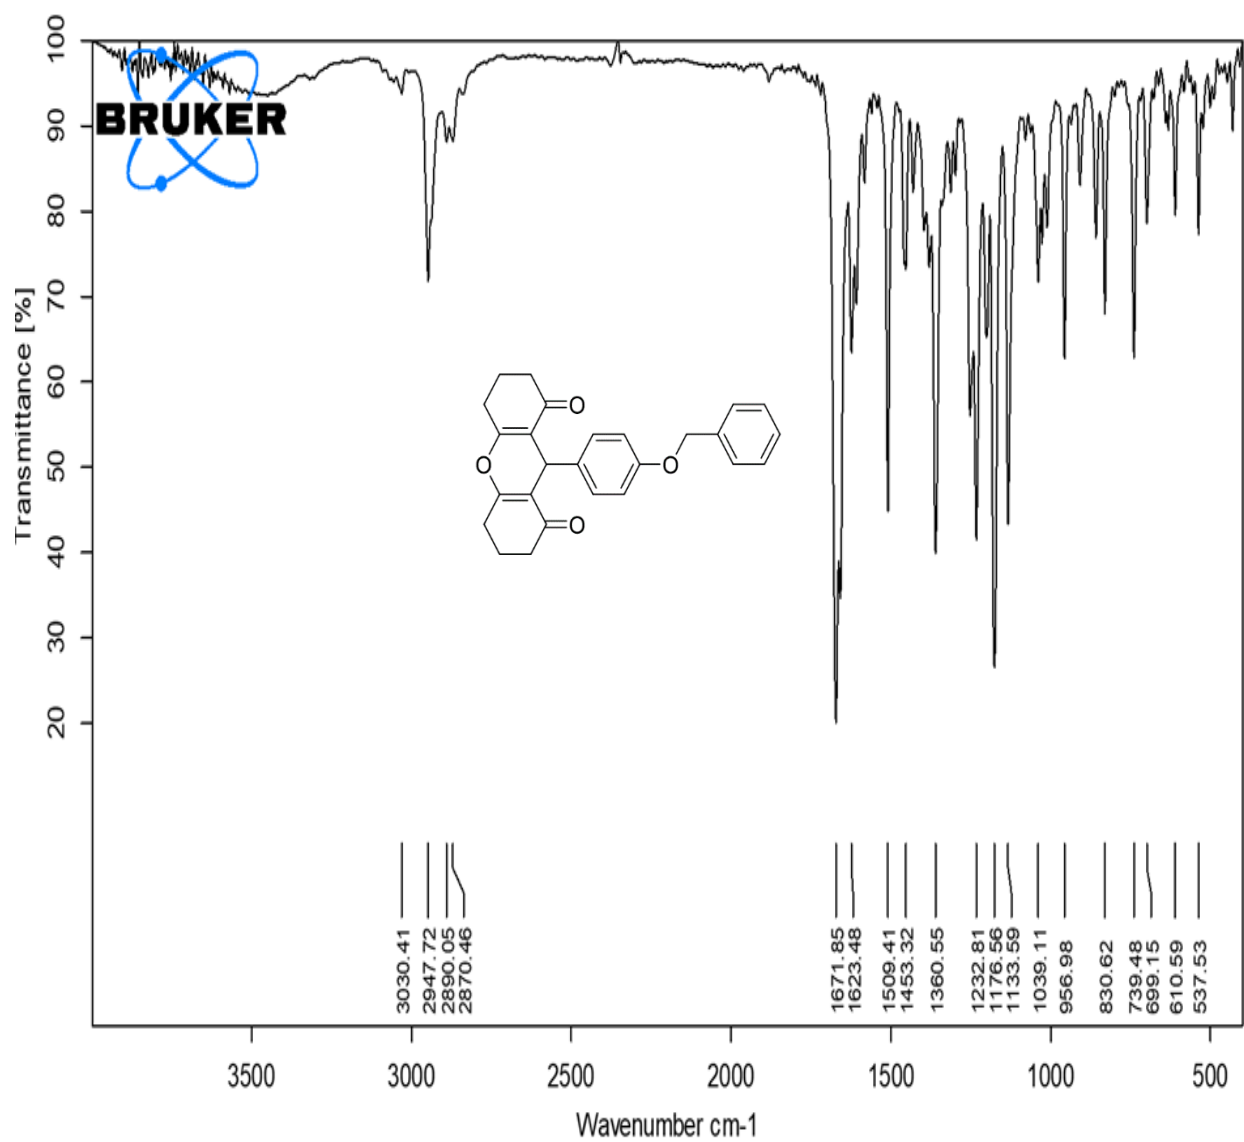

*IR spectrum of 4a*

## 4b Spectra

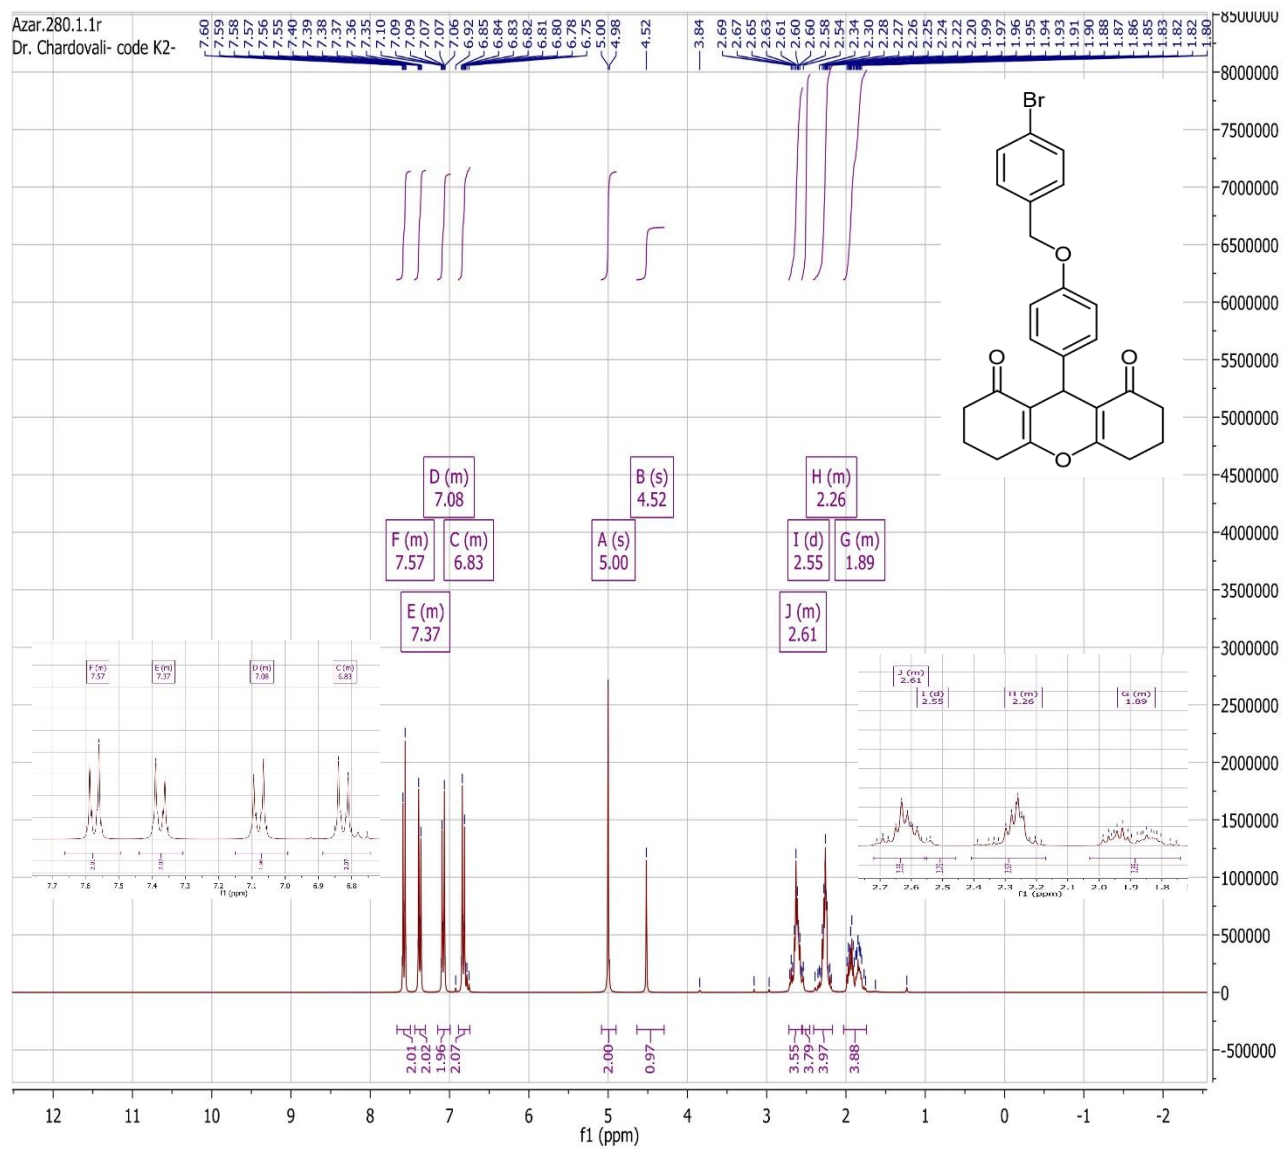

*<sup>1</sup>H-NMR spectrum of 4b*

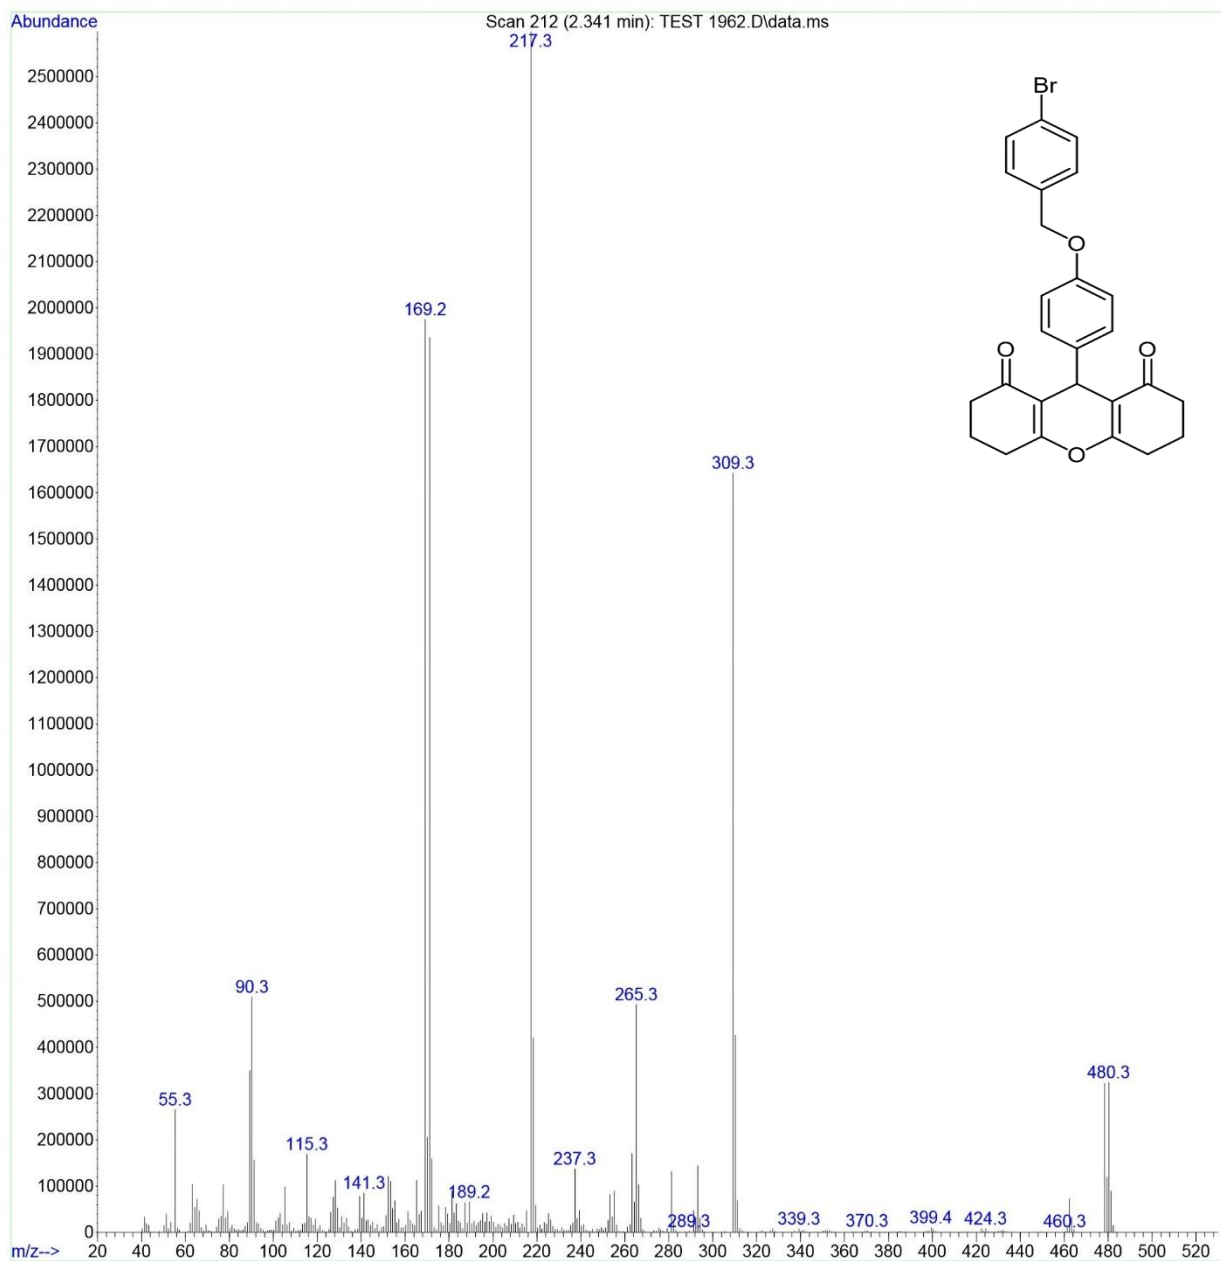

*Mass spectrum of 4b*

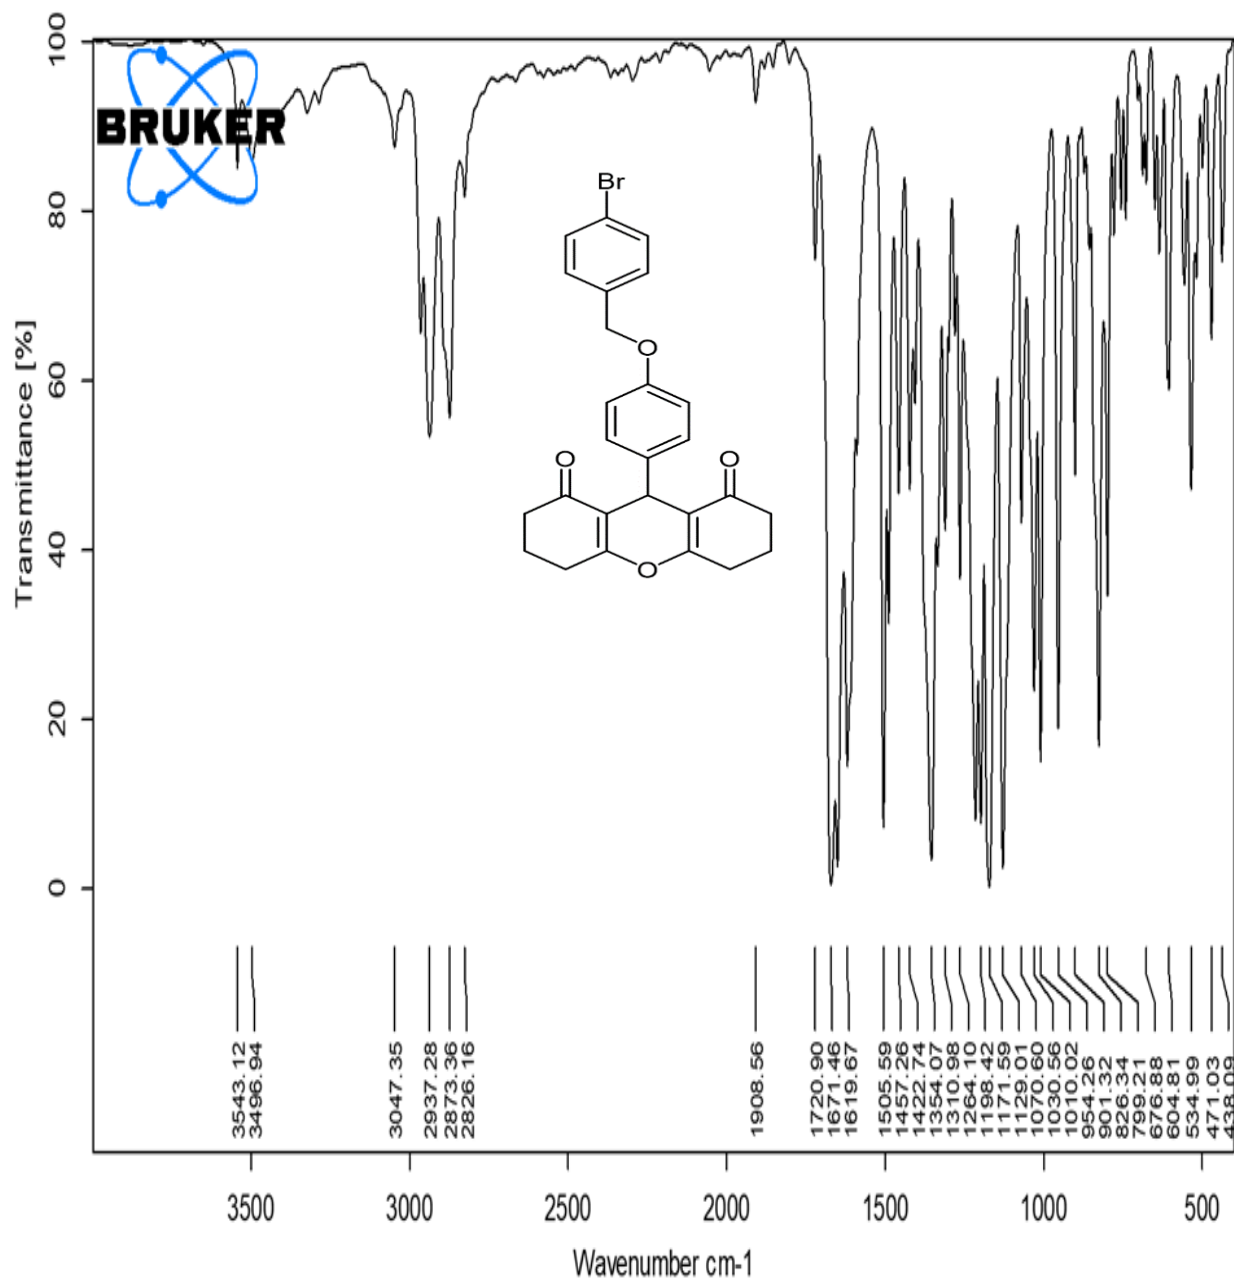

*IR spectrum of 4b*

# 4c Spectra

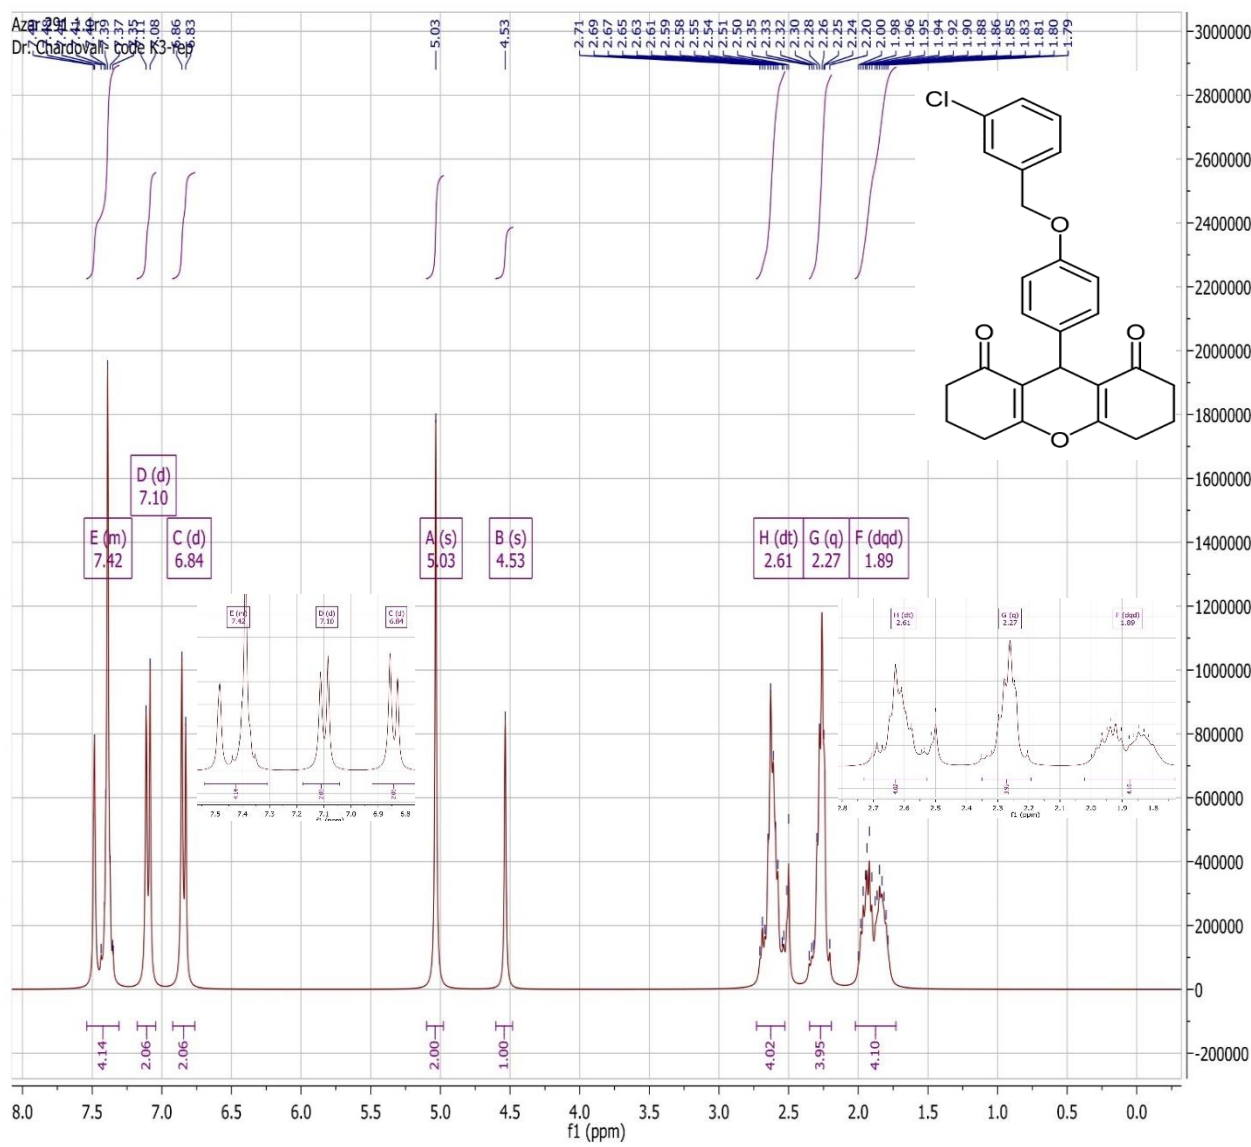

*<sup>1</sup>H-NMR spectrum of 4c*

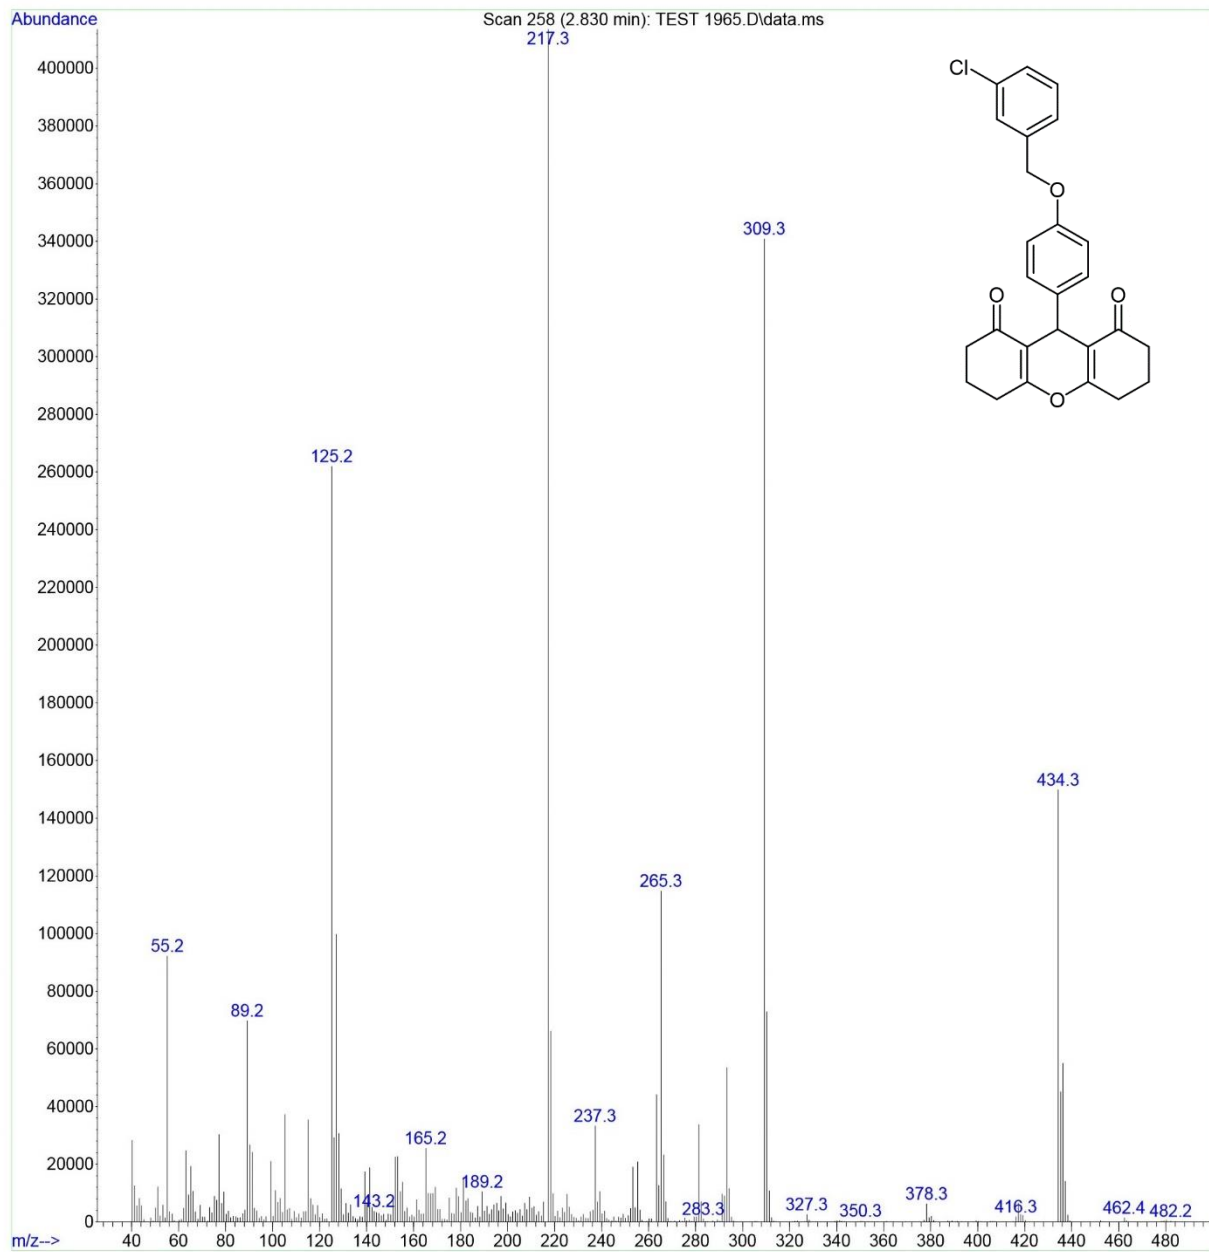

**Mass spectrum of 4c**



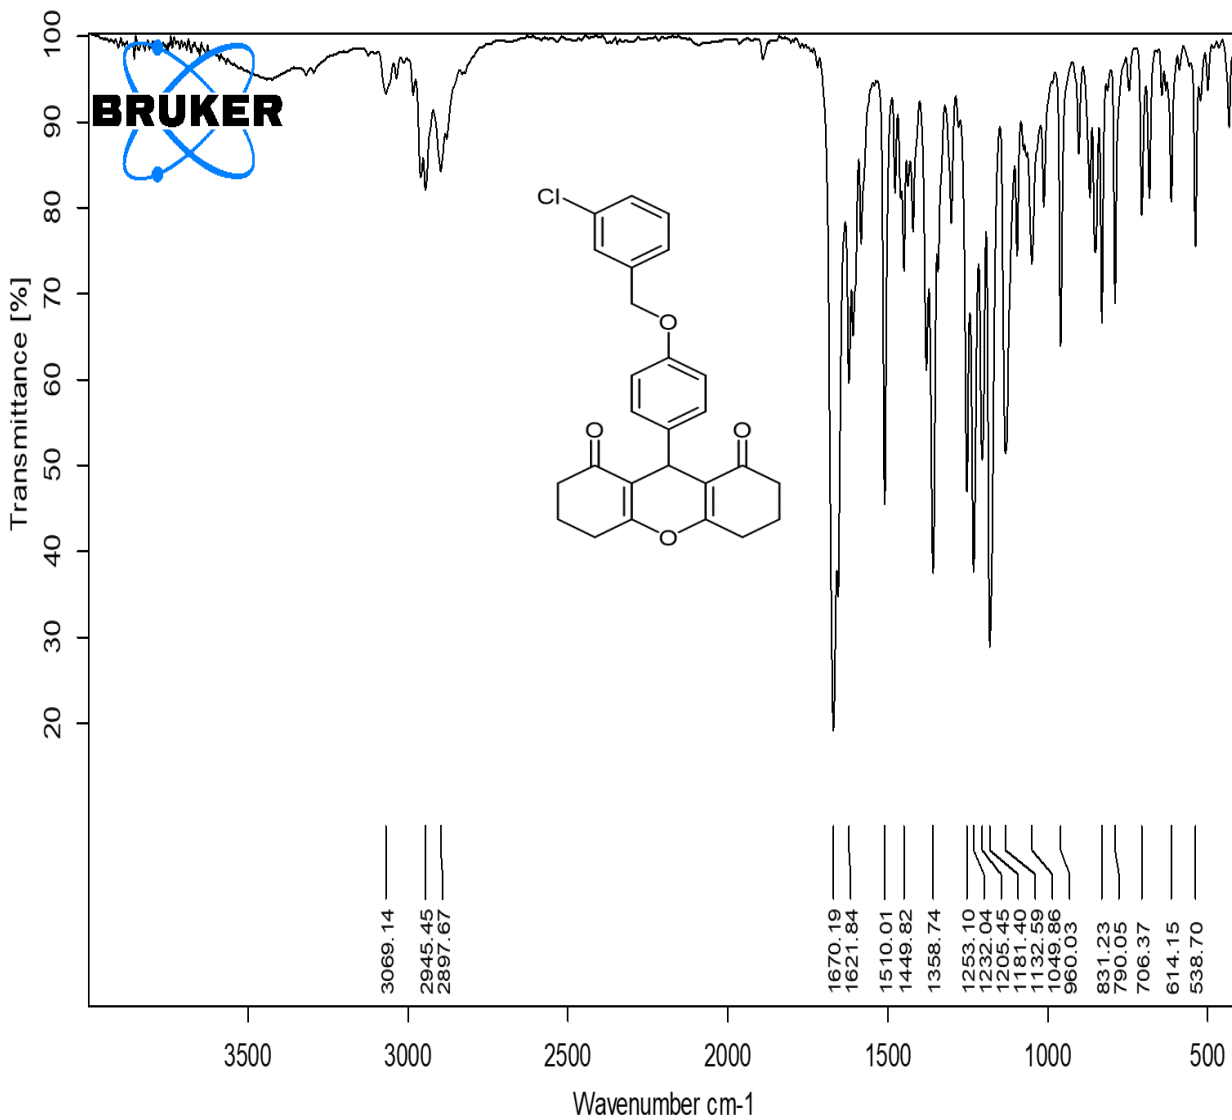

*IR spectrum of 4c*

## 4d Spectra

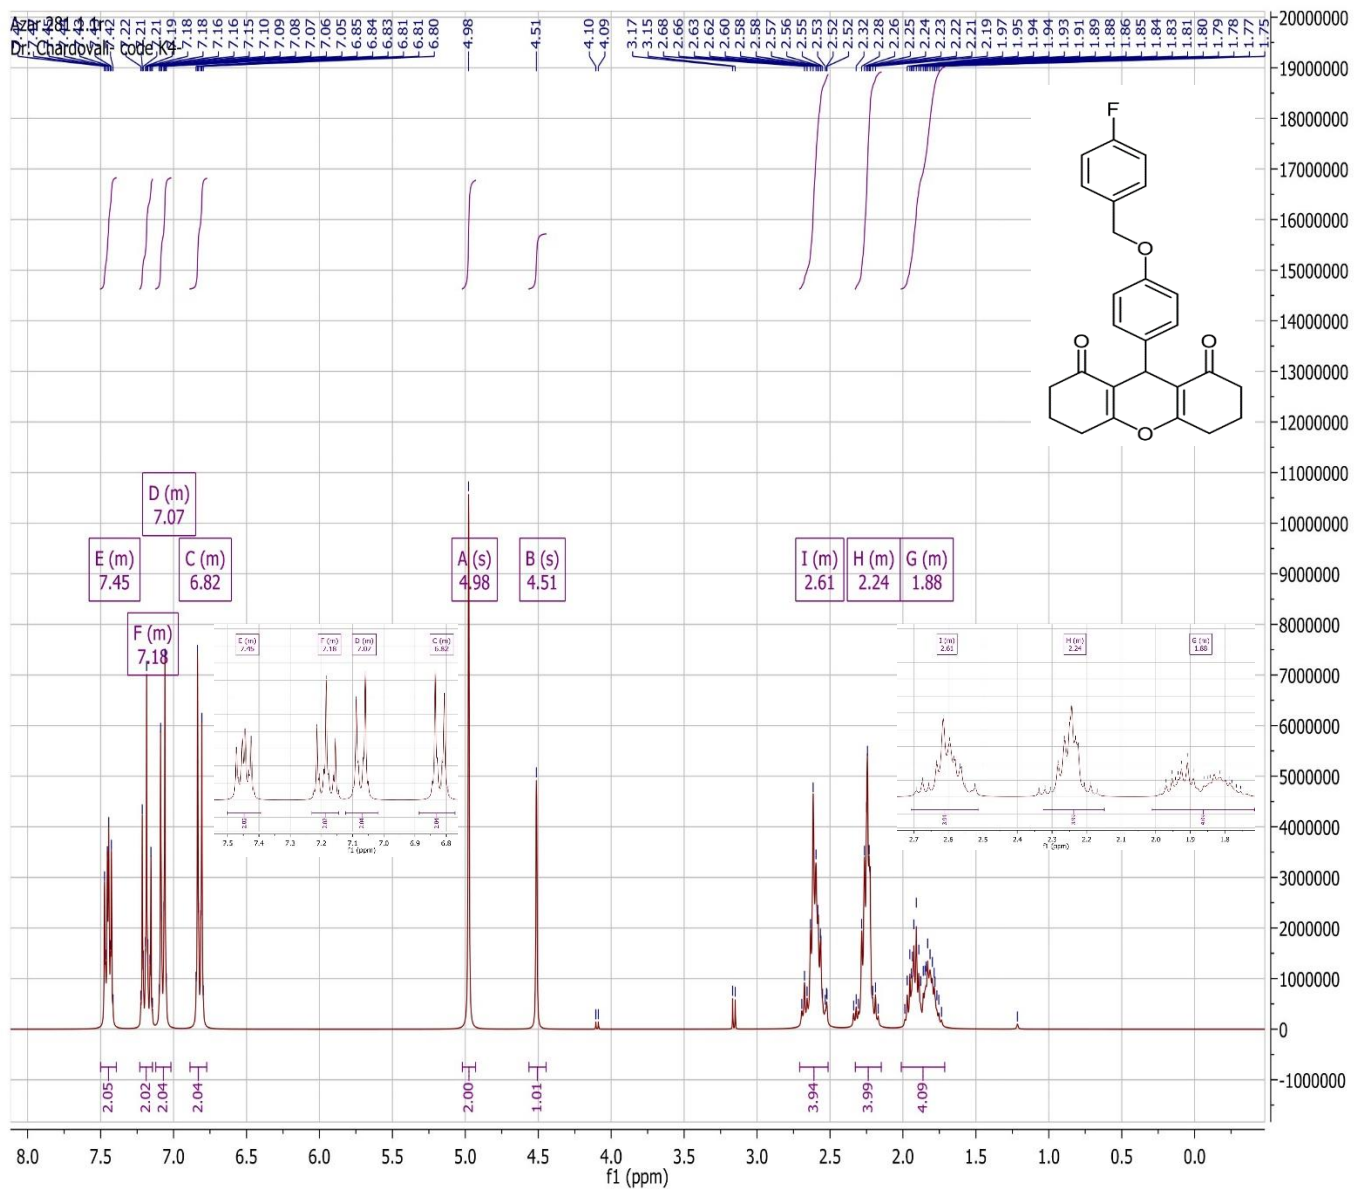

***<sup>1</sup>H-NMR spectrum of 4d***

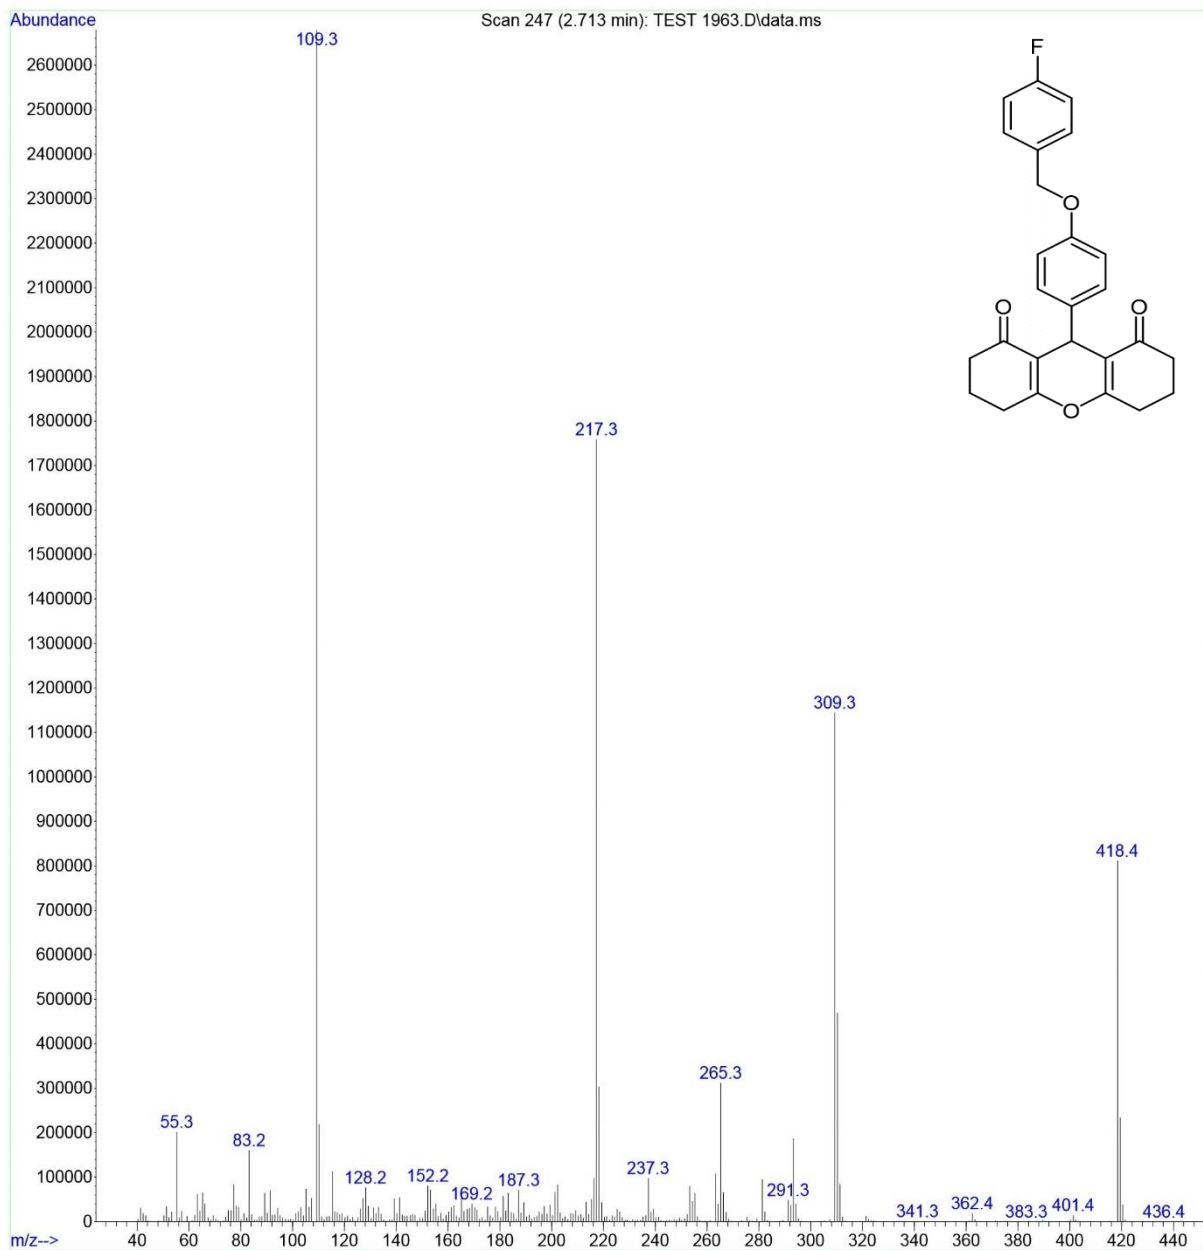

*Mass spectrum of 4d*

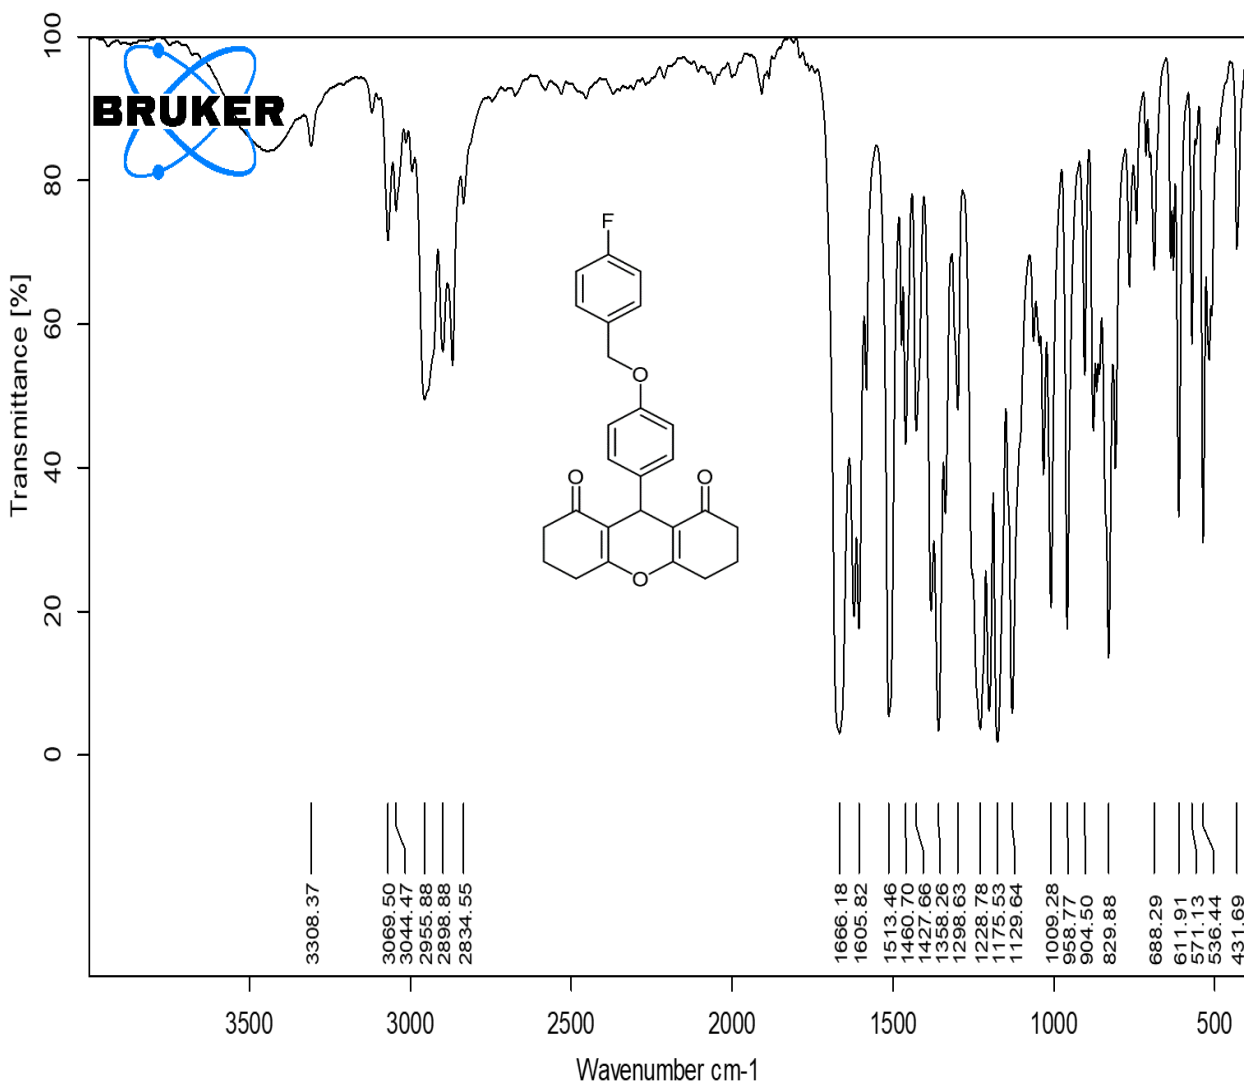

*IR spectrum of 4d*

## 4e Spectra

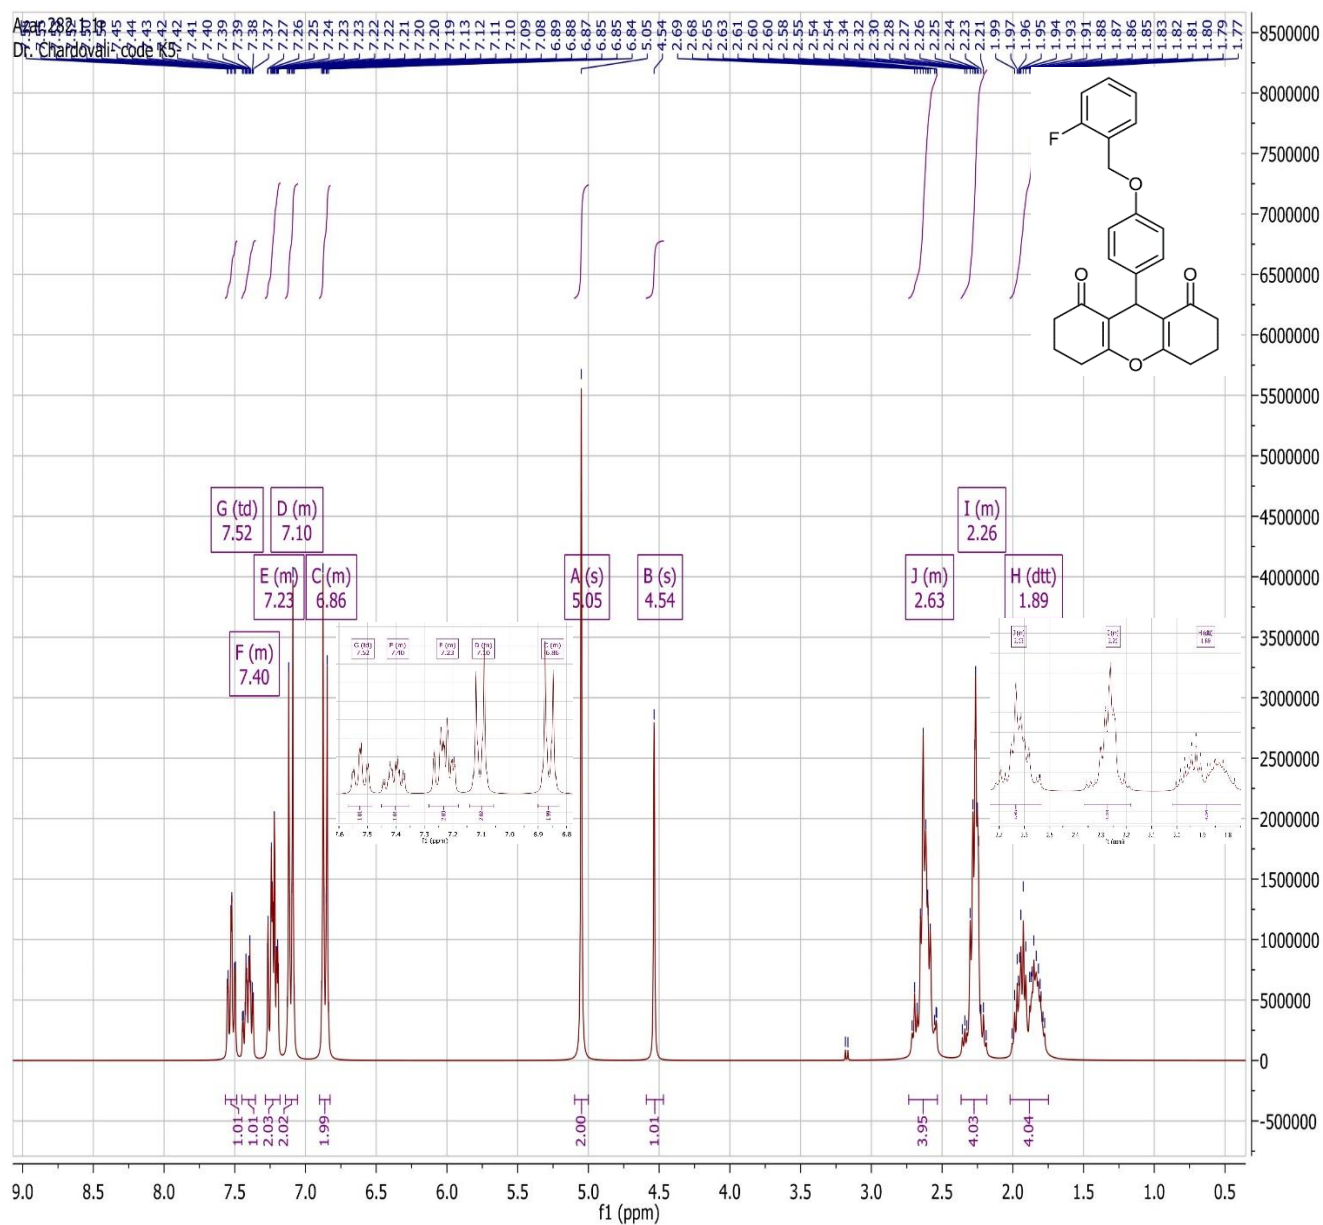

<sup>1</sup>H-NMR spectrum of 4e

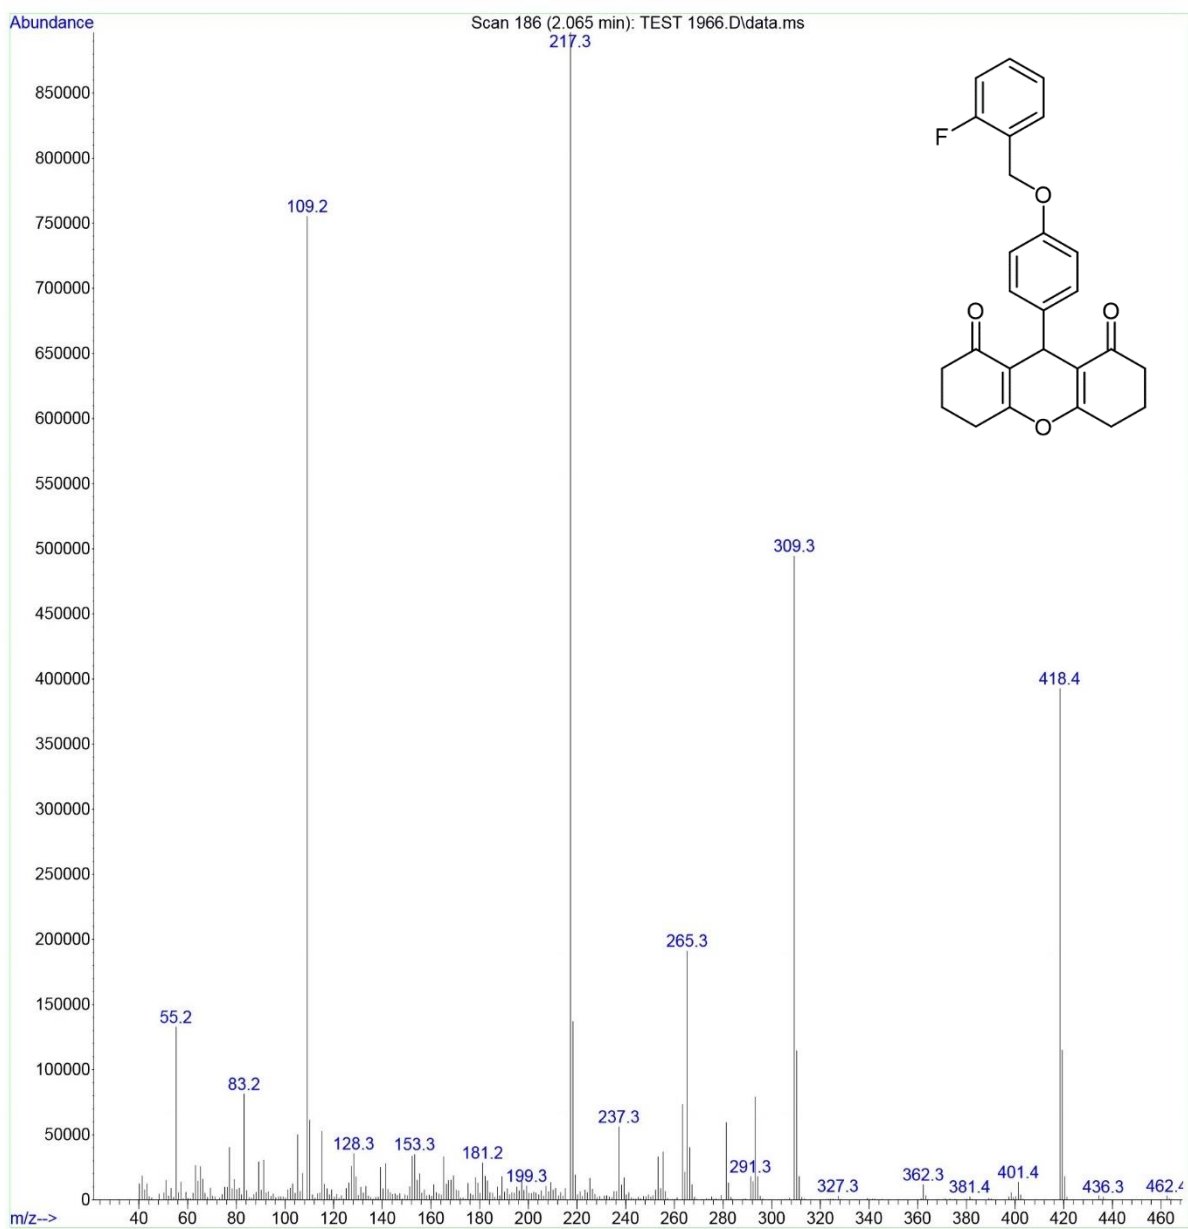

*Mass spectrum of 4e*

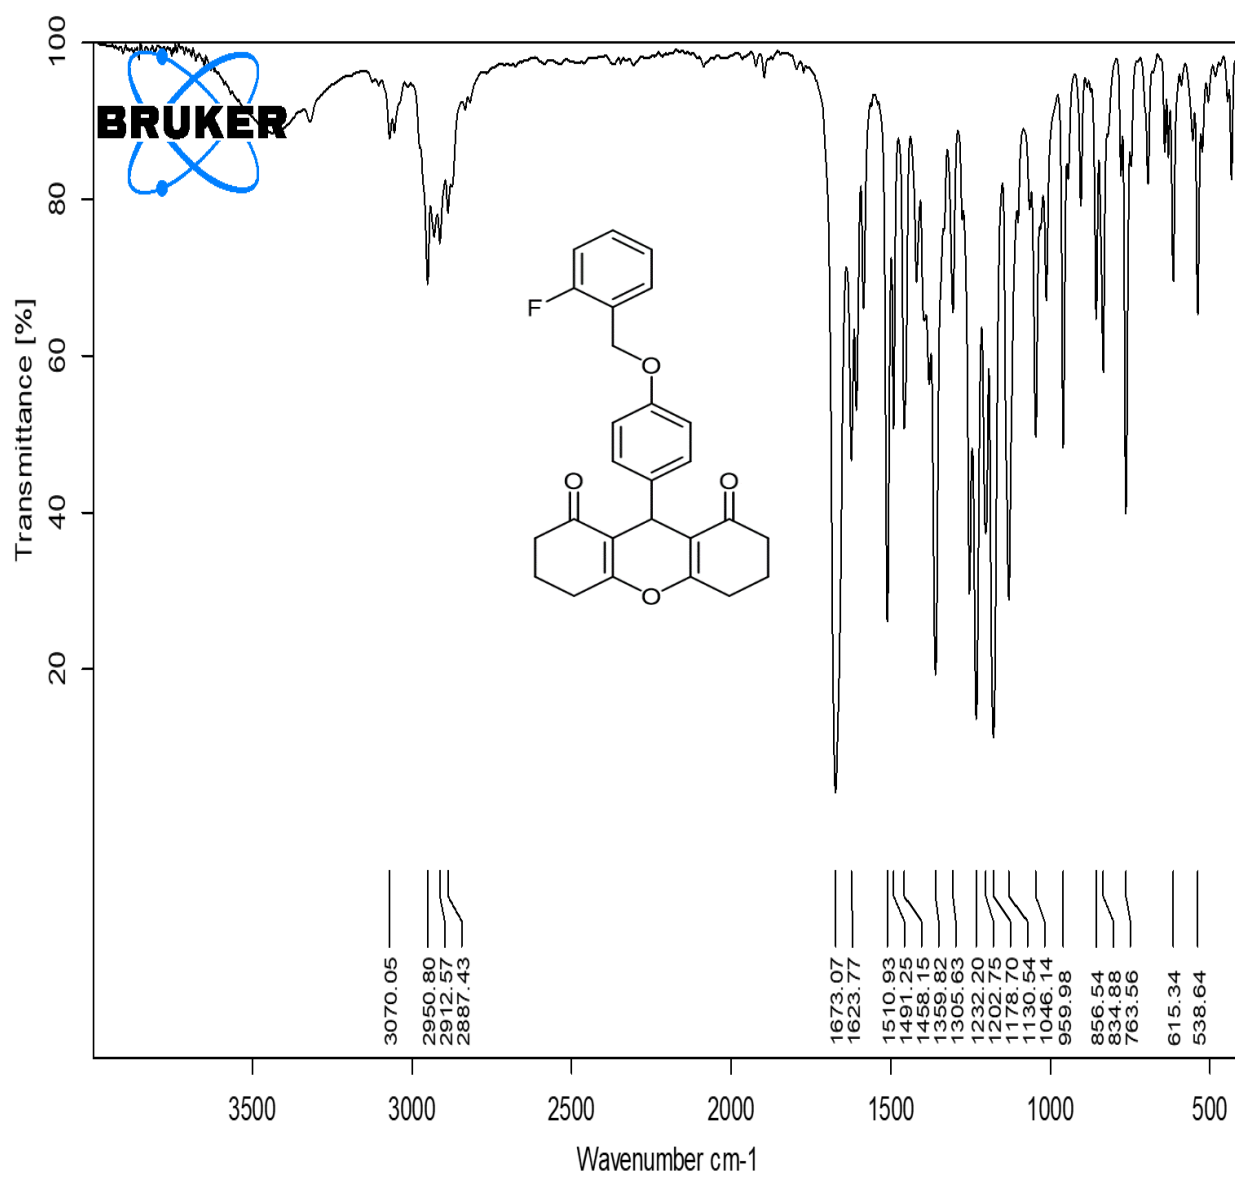

*IR spectrum of 4e*

## 4f Spectra

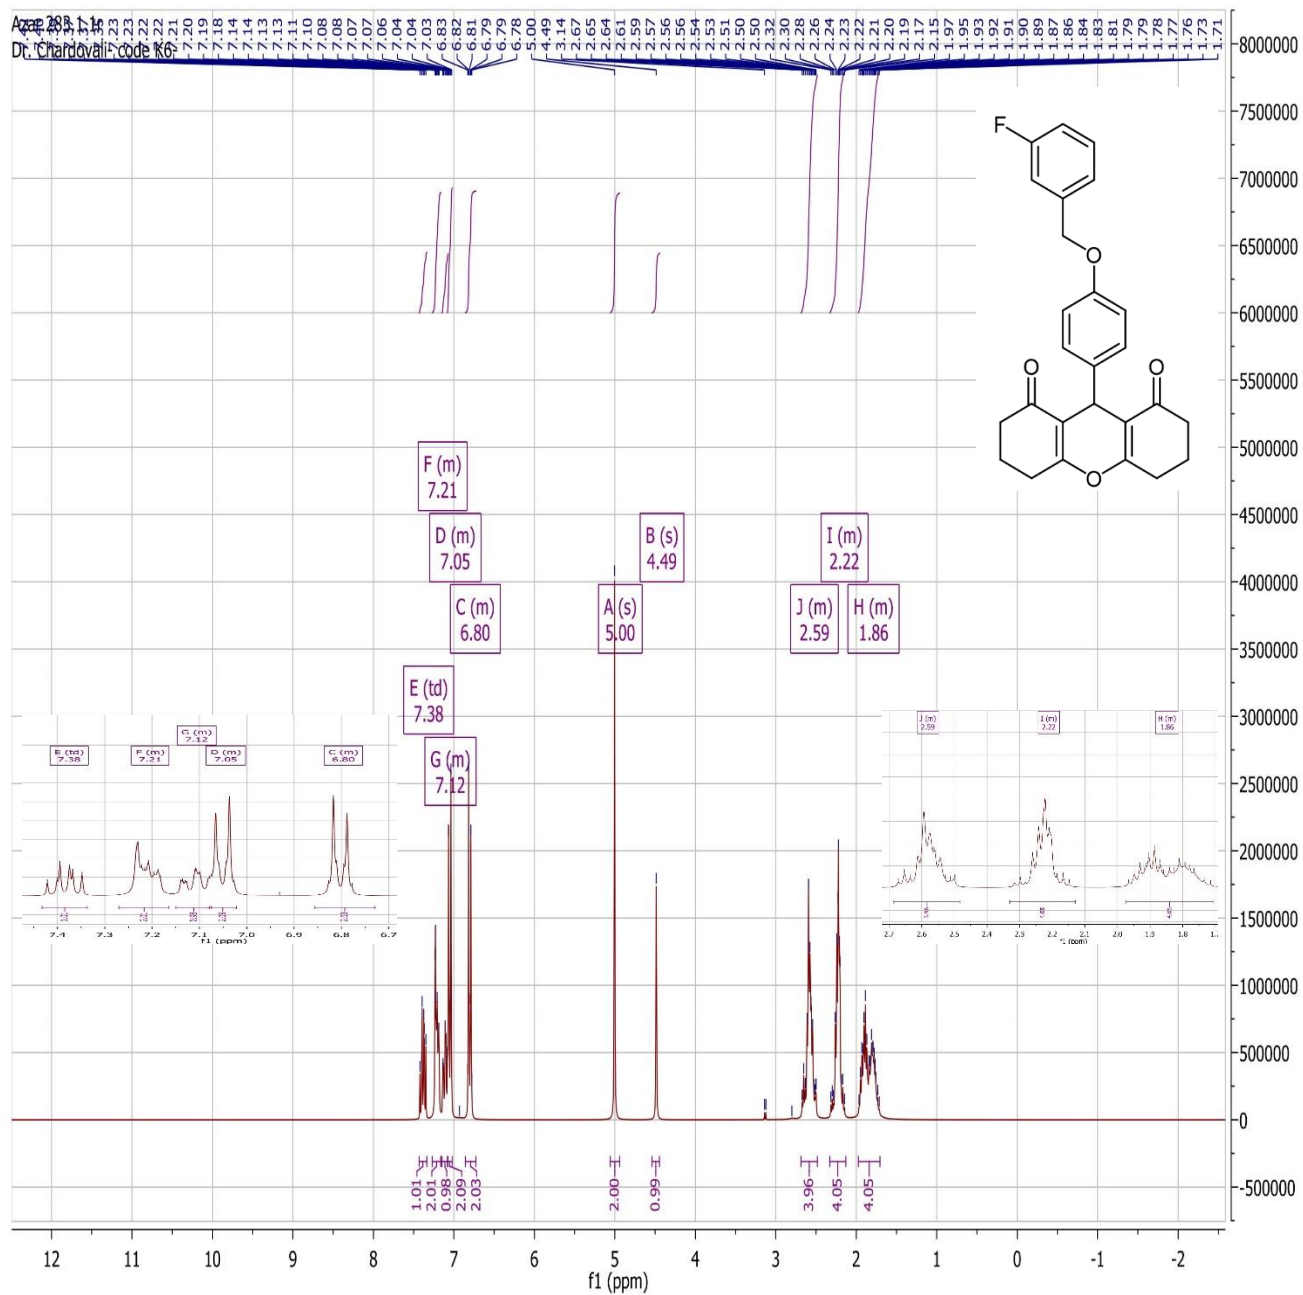

***<sup>1</sup>H-NMR spectrum of 4f***



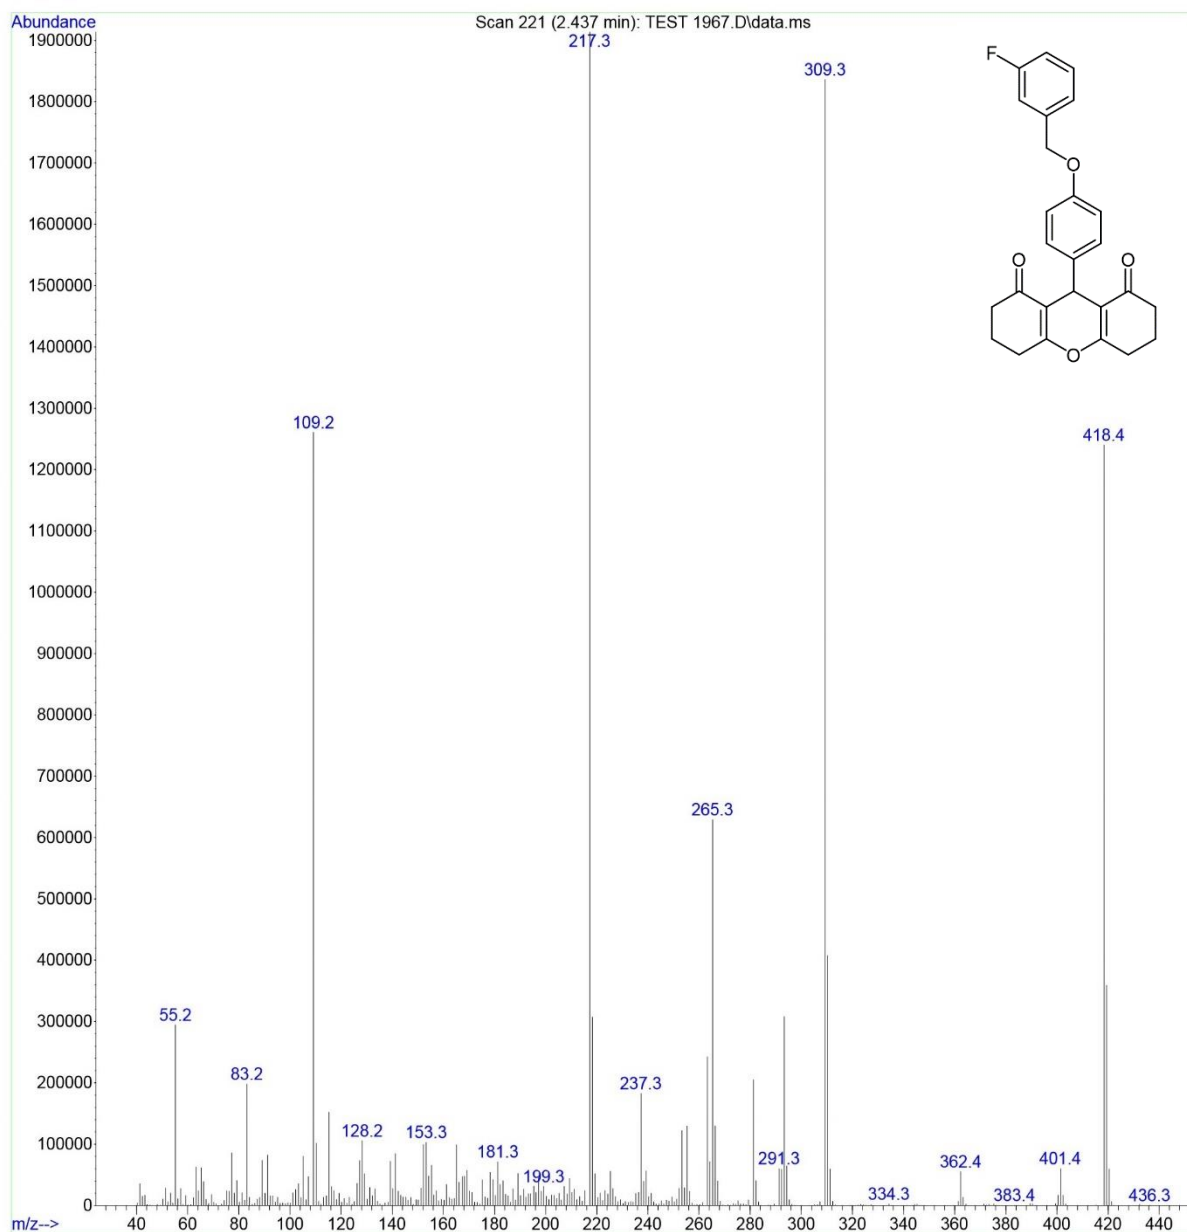

*Mass spectrum of 4f*

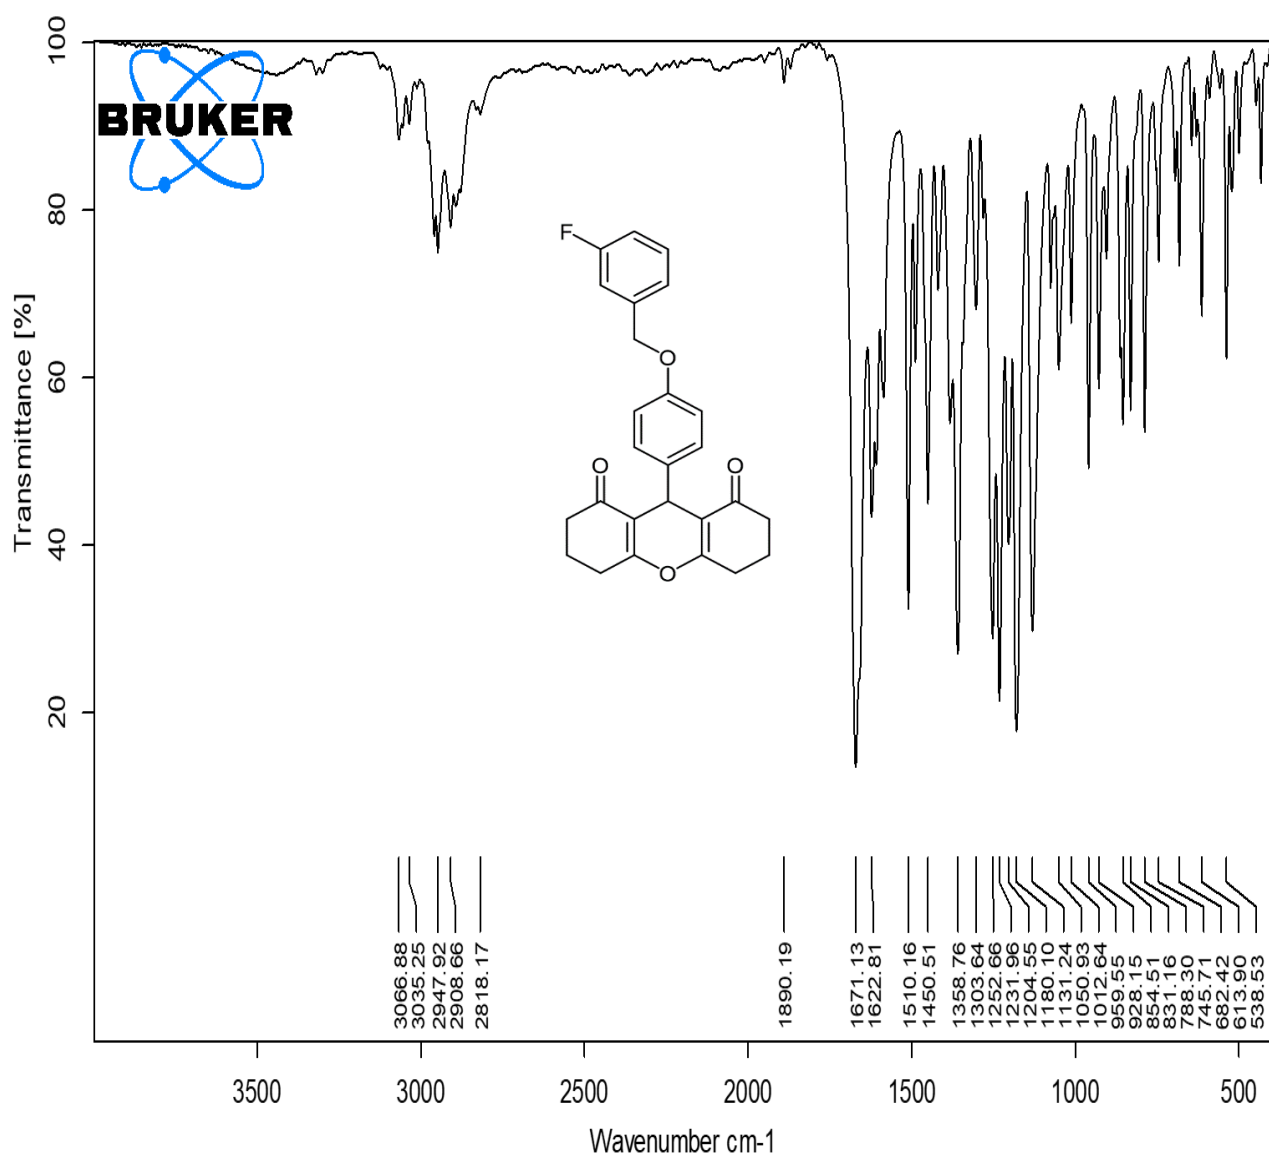

*IR spectrum of 4f*

# 4g Spectra

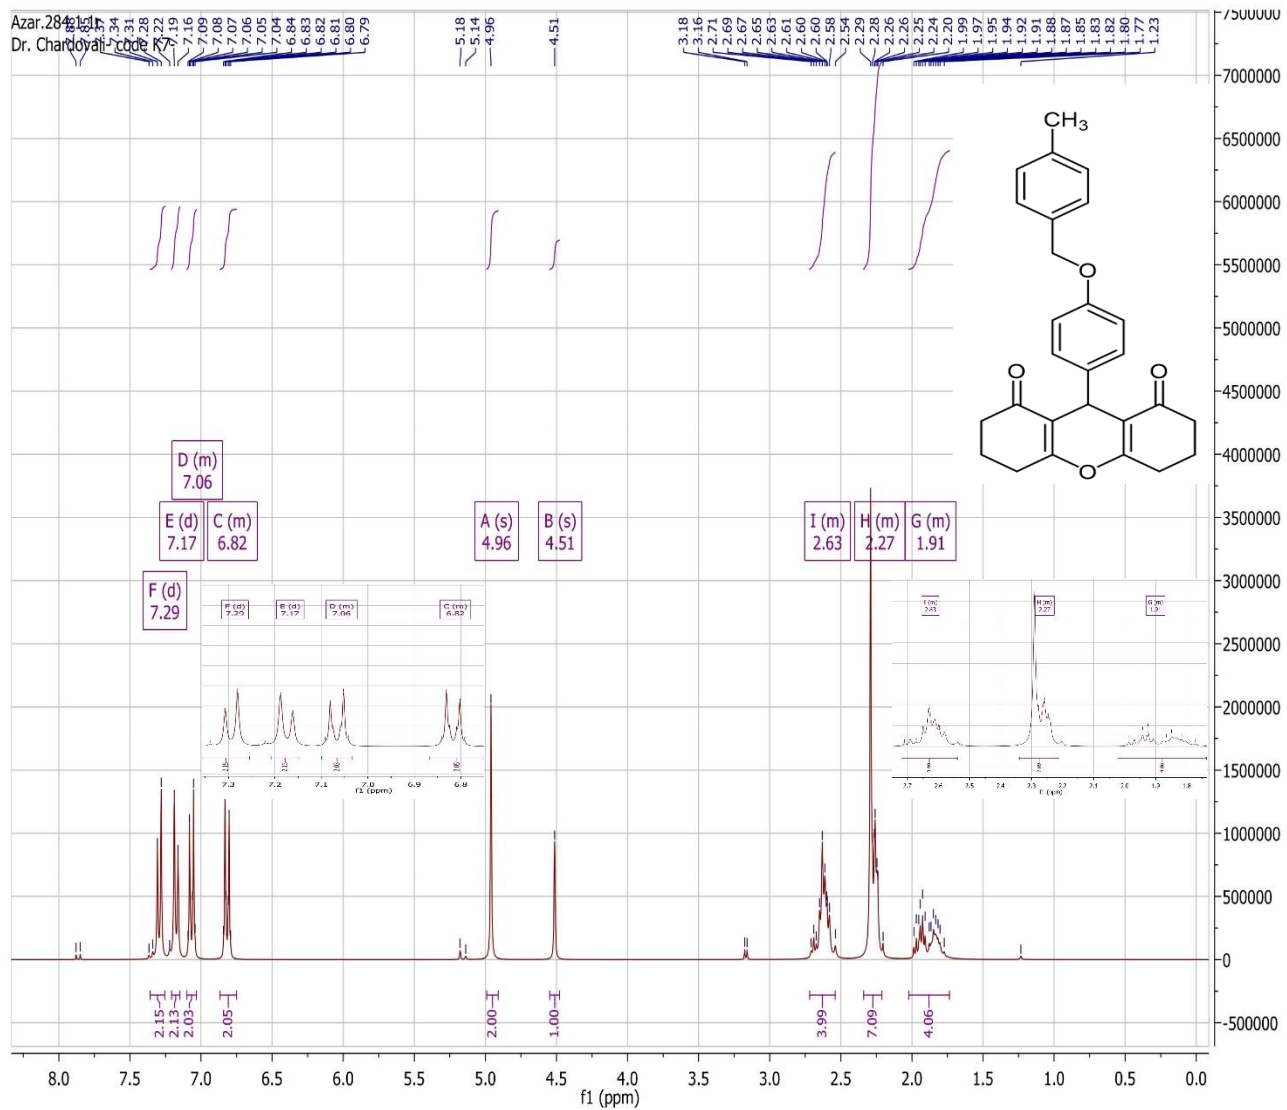

*<sup>1</sup>H-NMR spectrum of 4g*

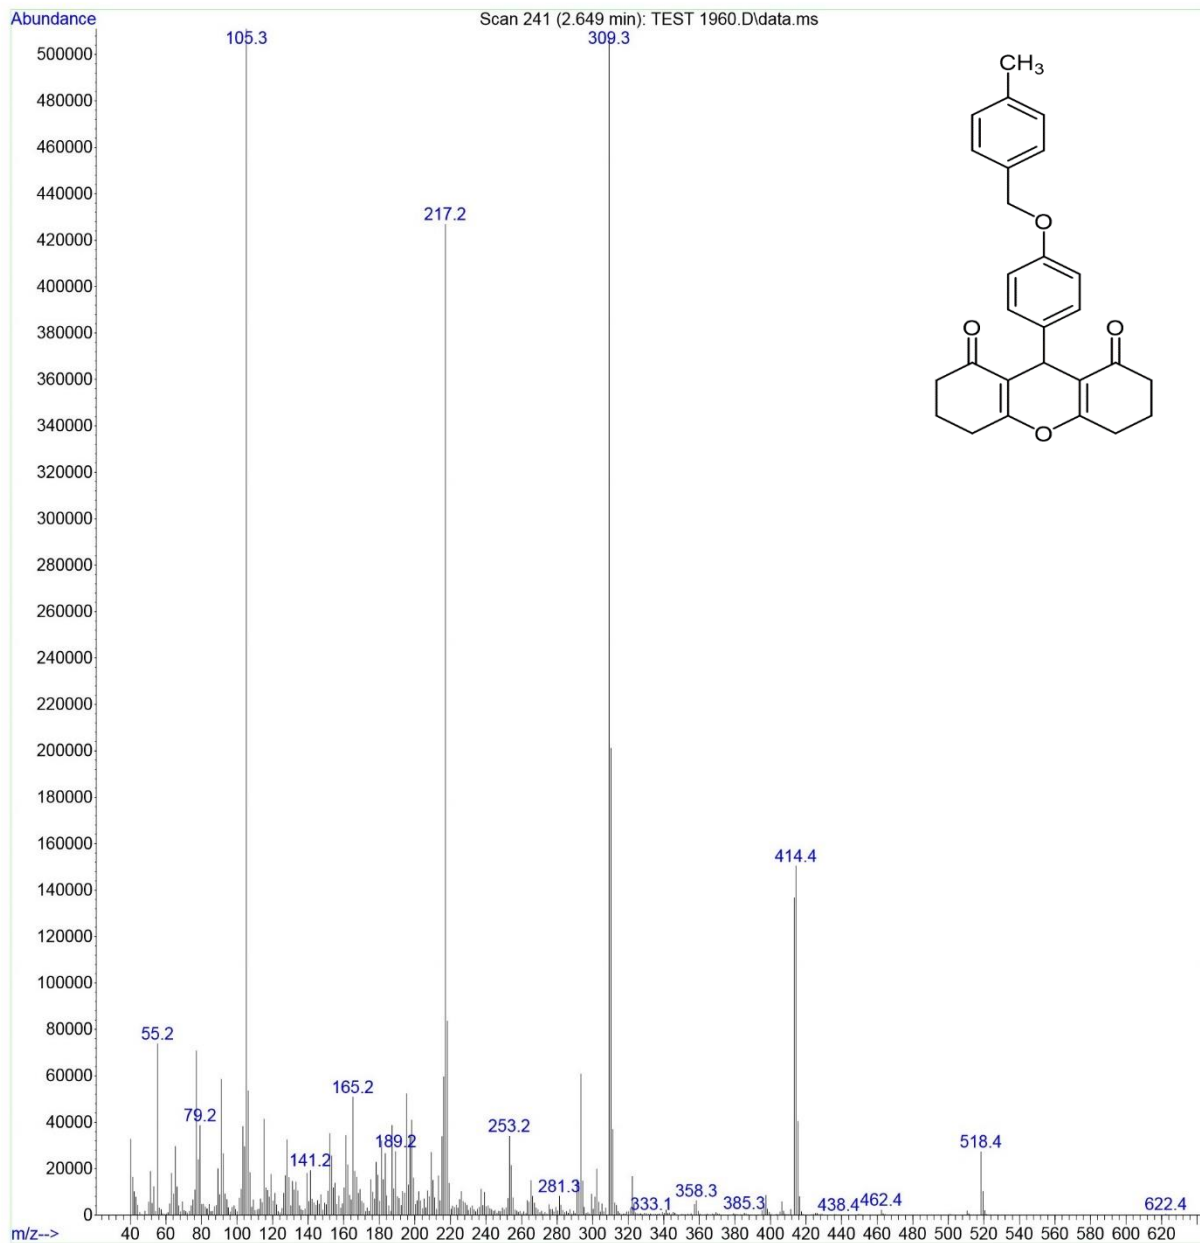

**Mass spectrum of 4g**

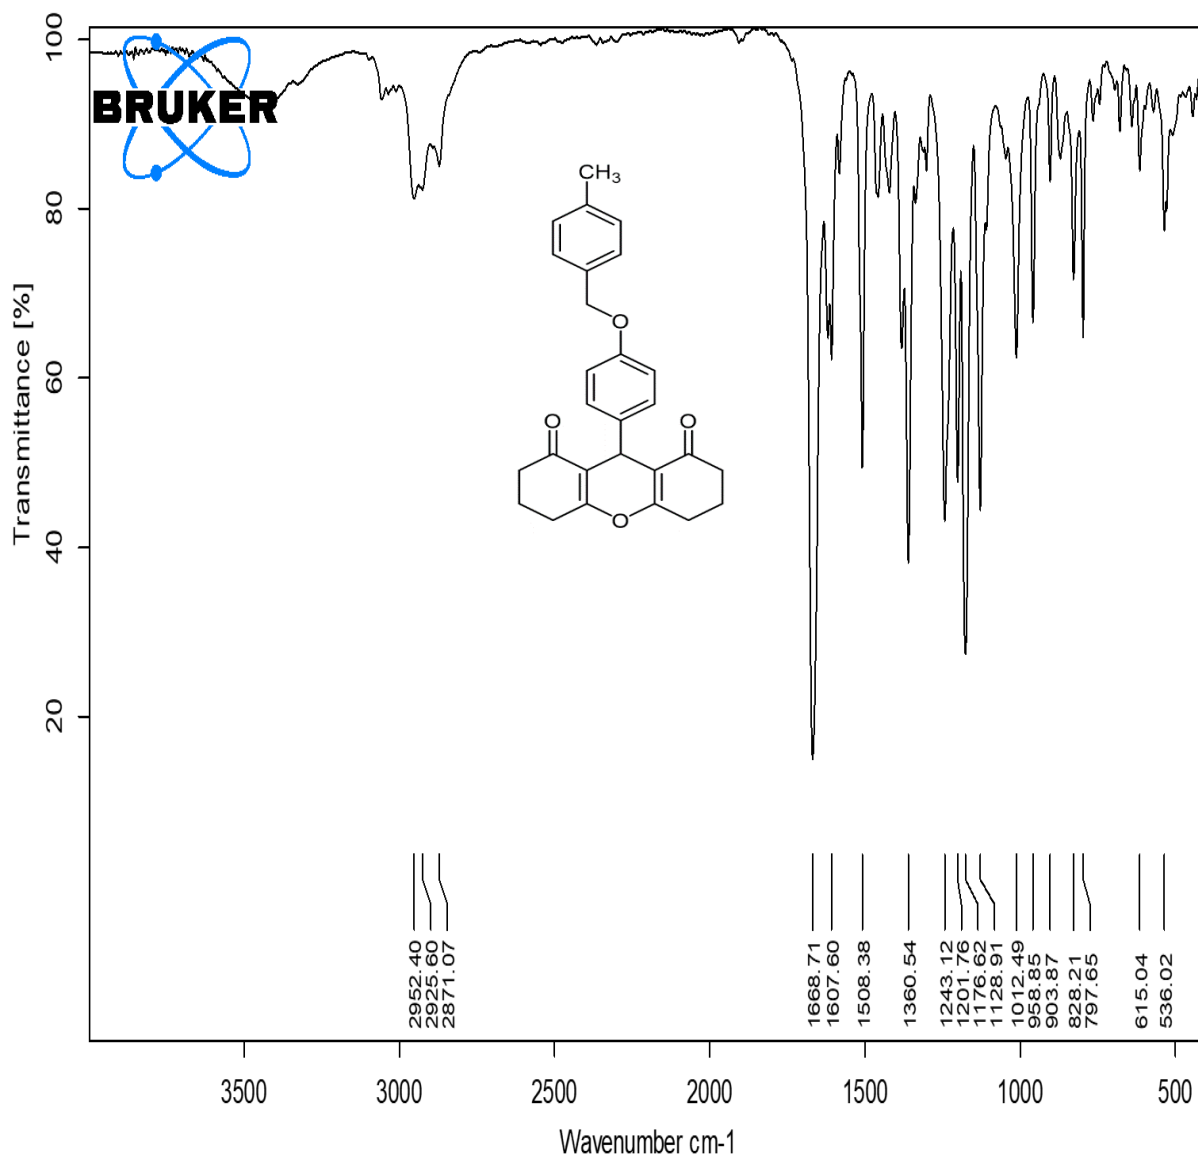

*IR spectrum of 4g*

# 4h Spectra

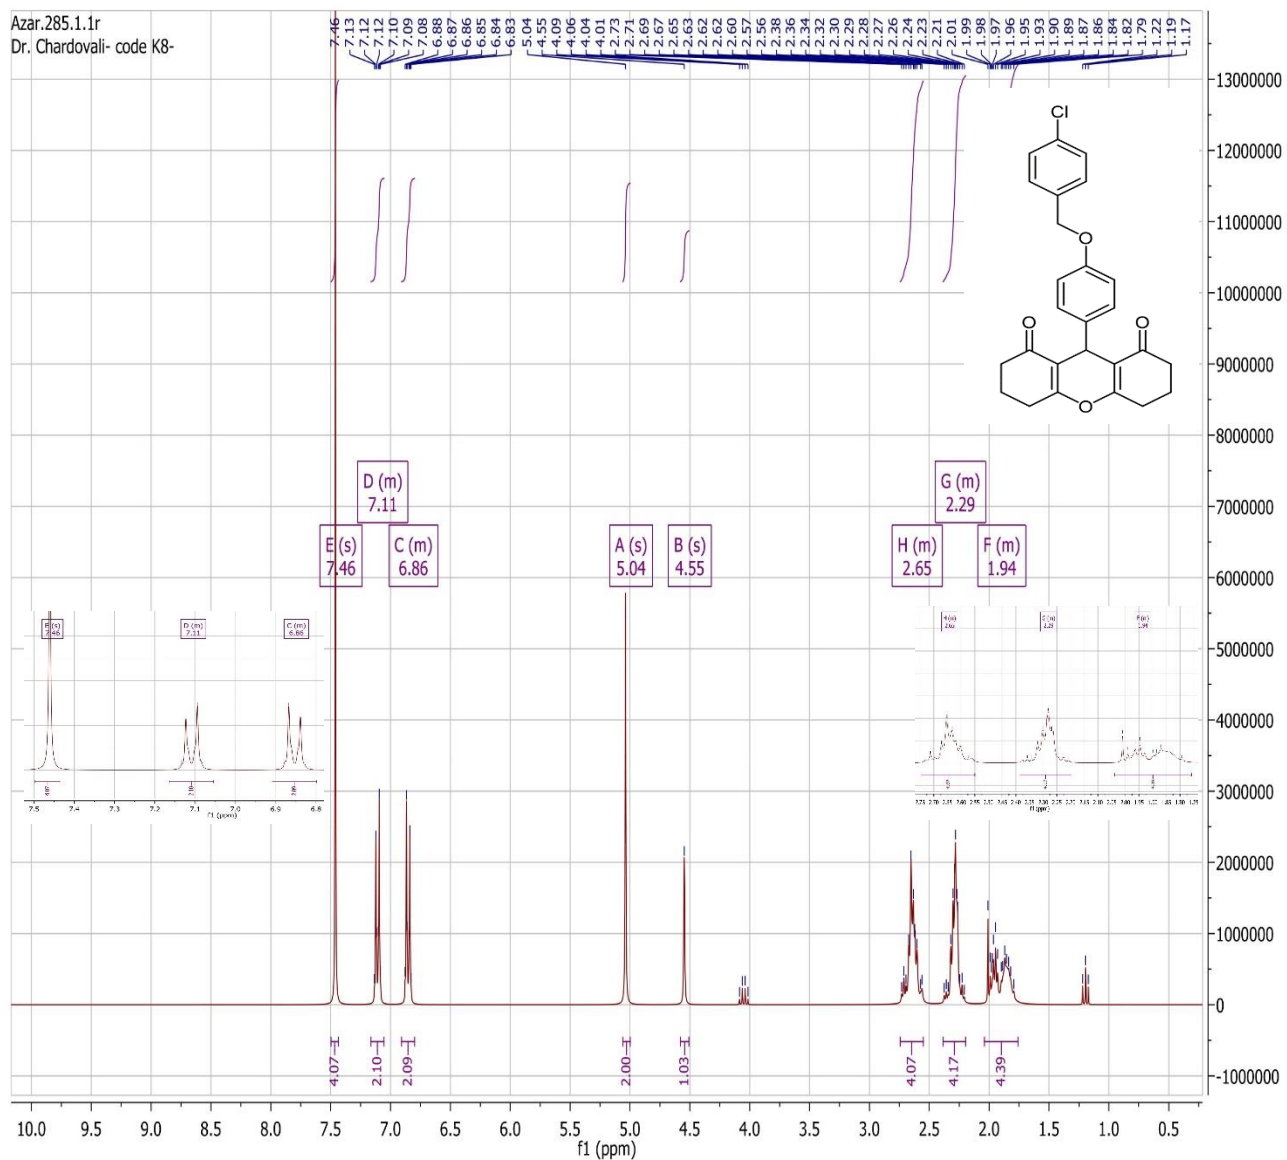

***<sup>1</sup>H-NMR spectrum of 4h***

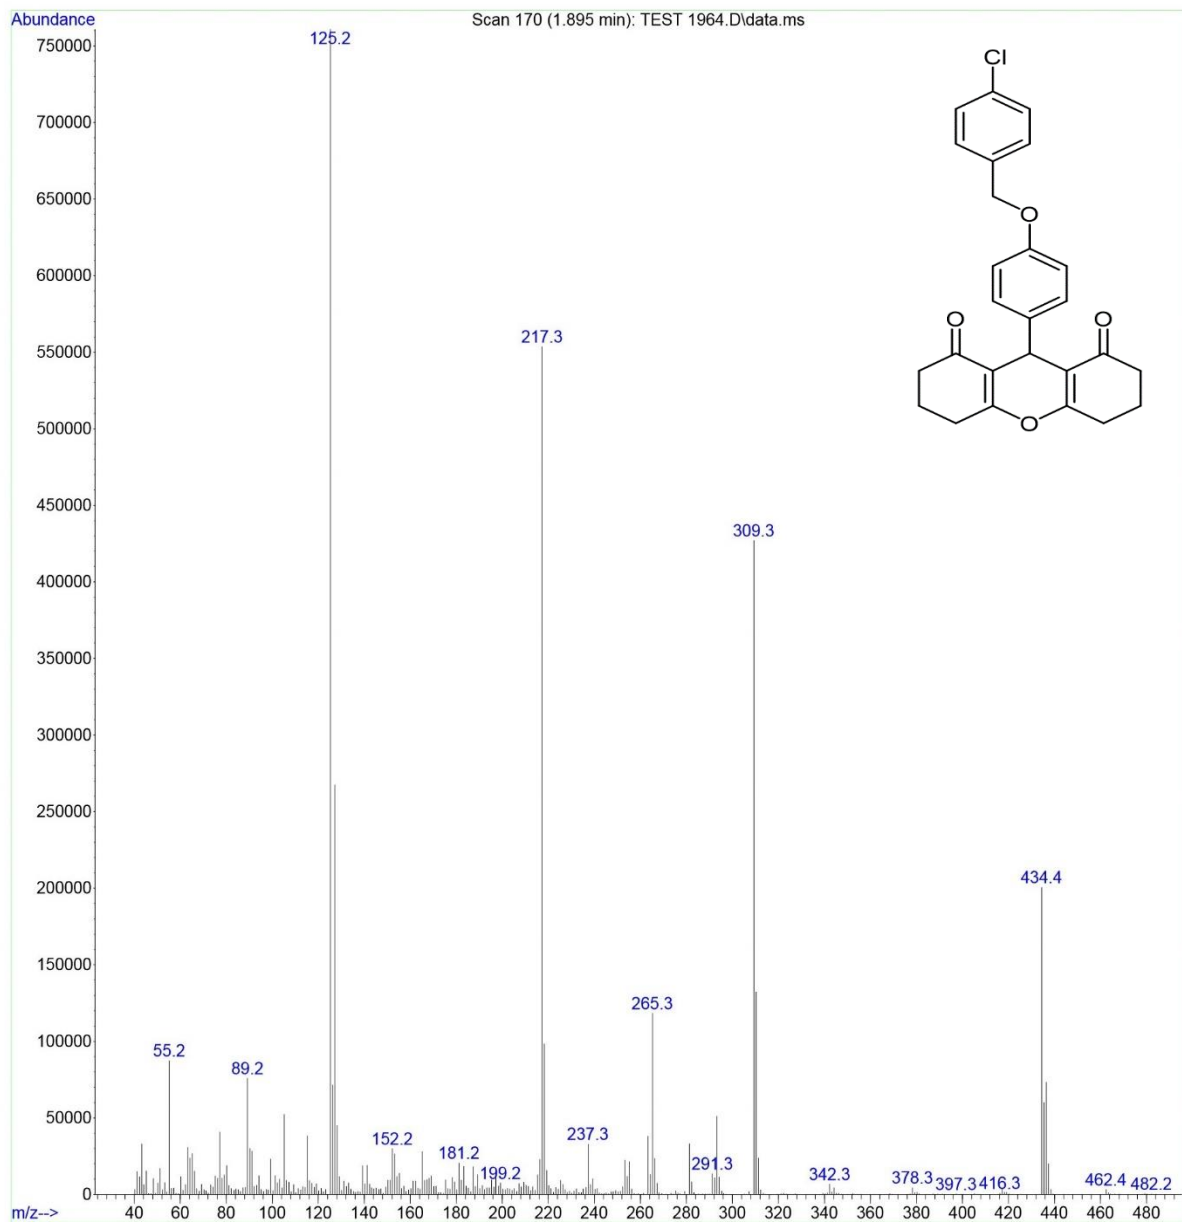

**Mass spectrum of 4h**

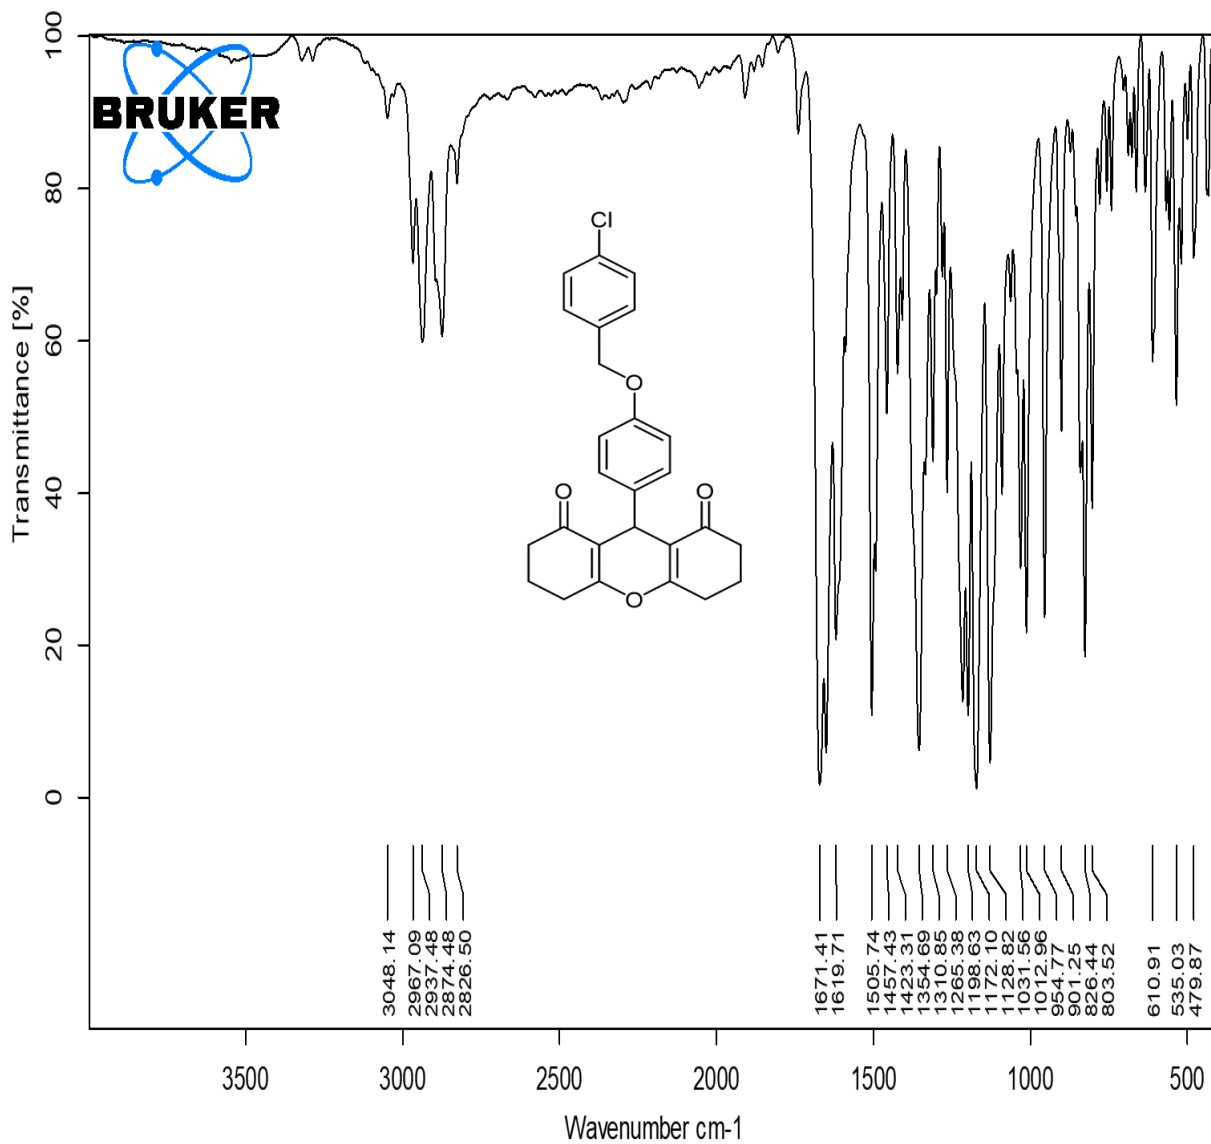

*IR spectrum of 4h*



## 4i Spectra

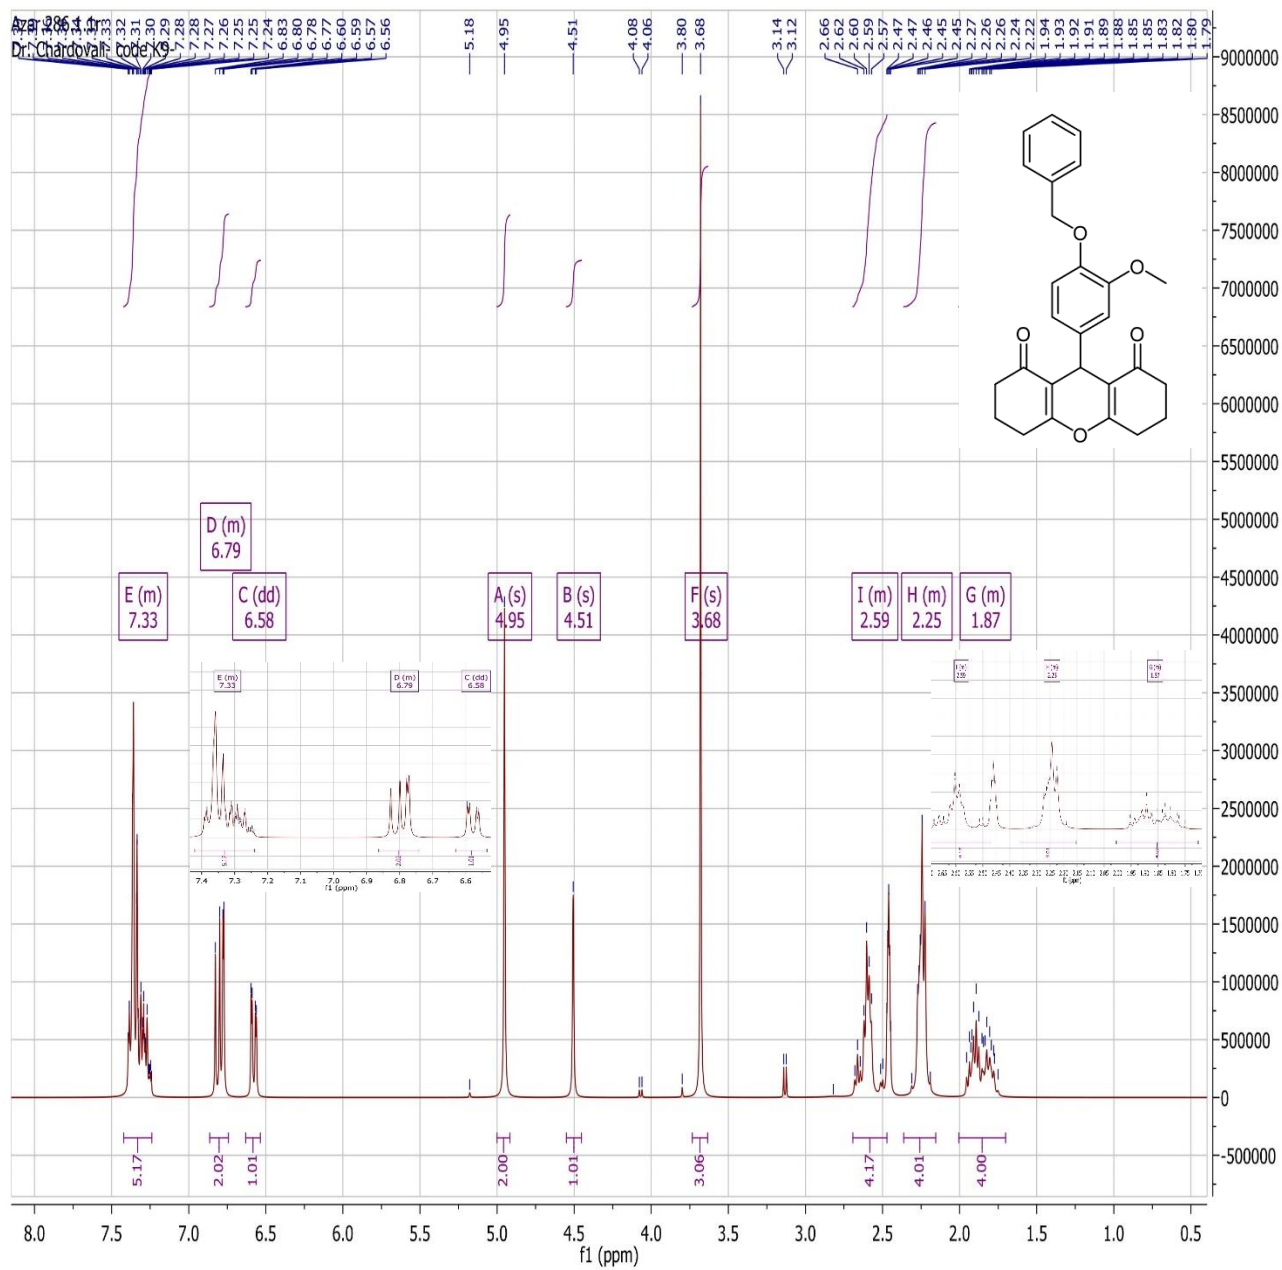

$^1\text{H-NMR}$  spectrum of 4i

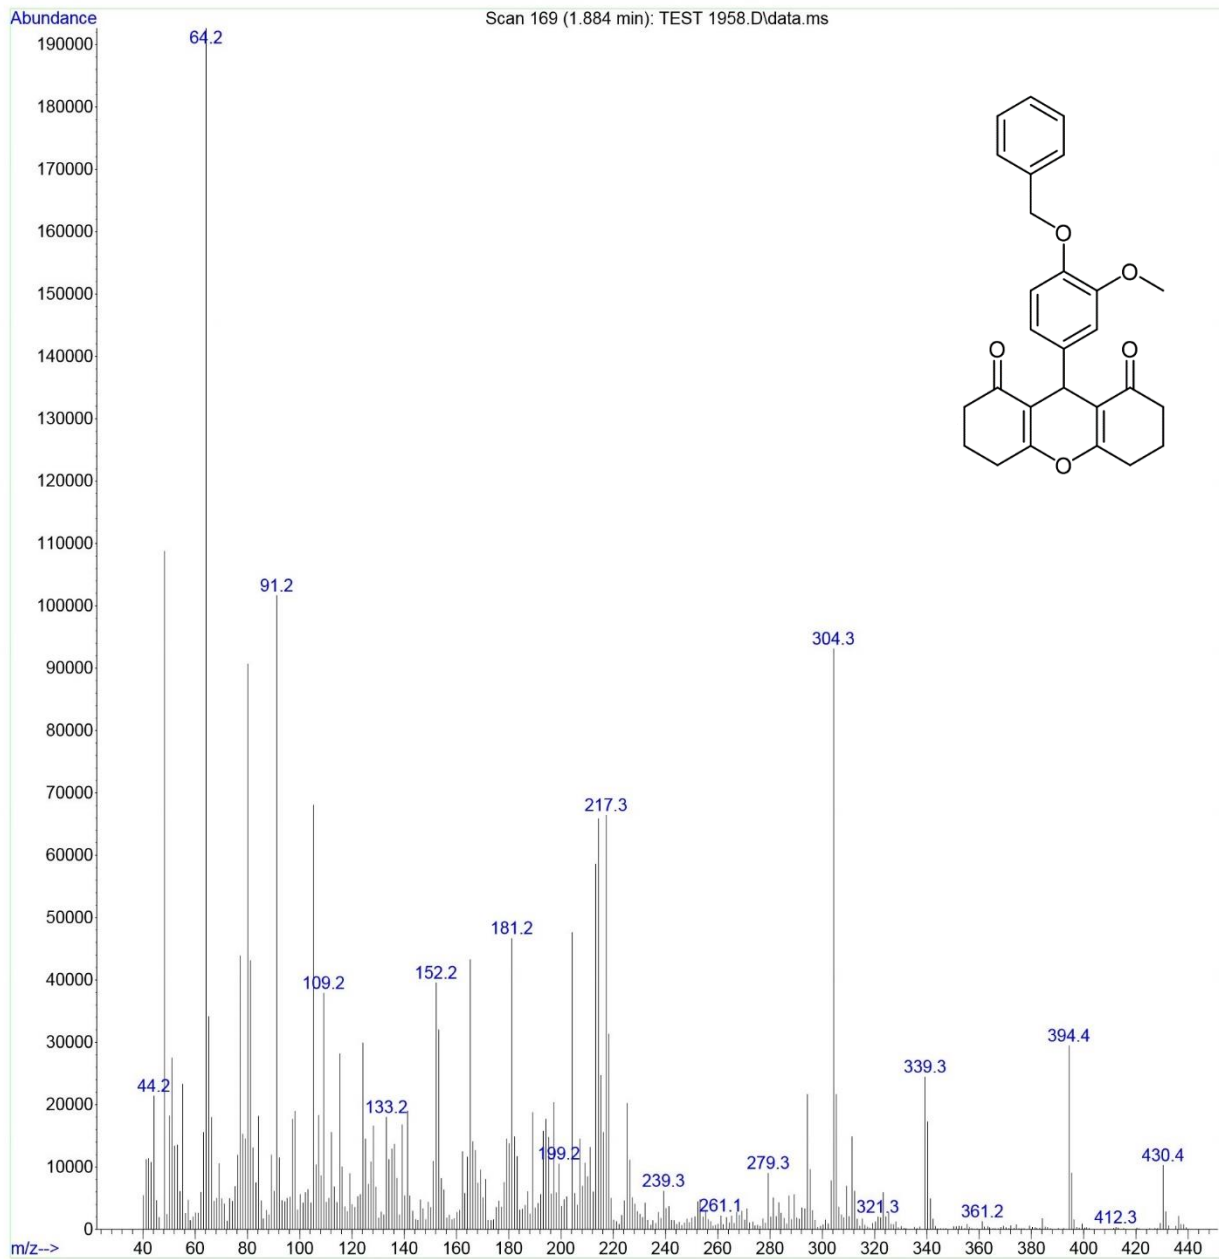

*Mass spectrum of 4i*

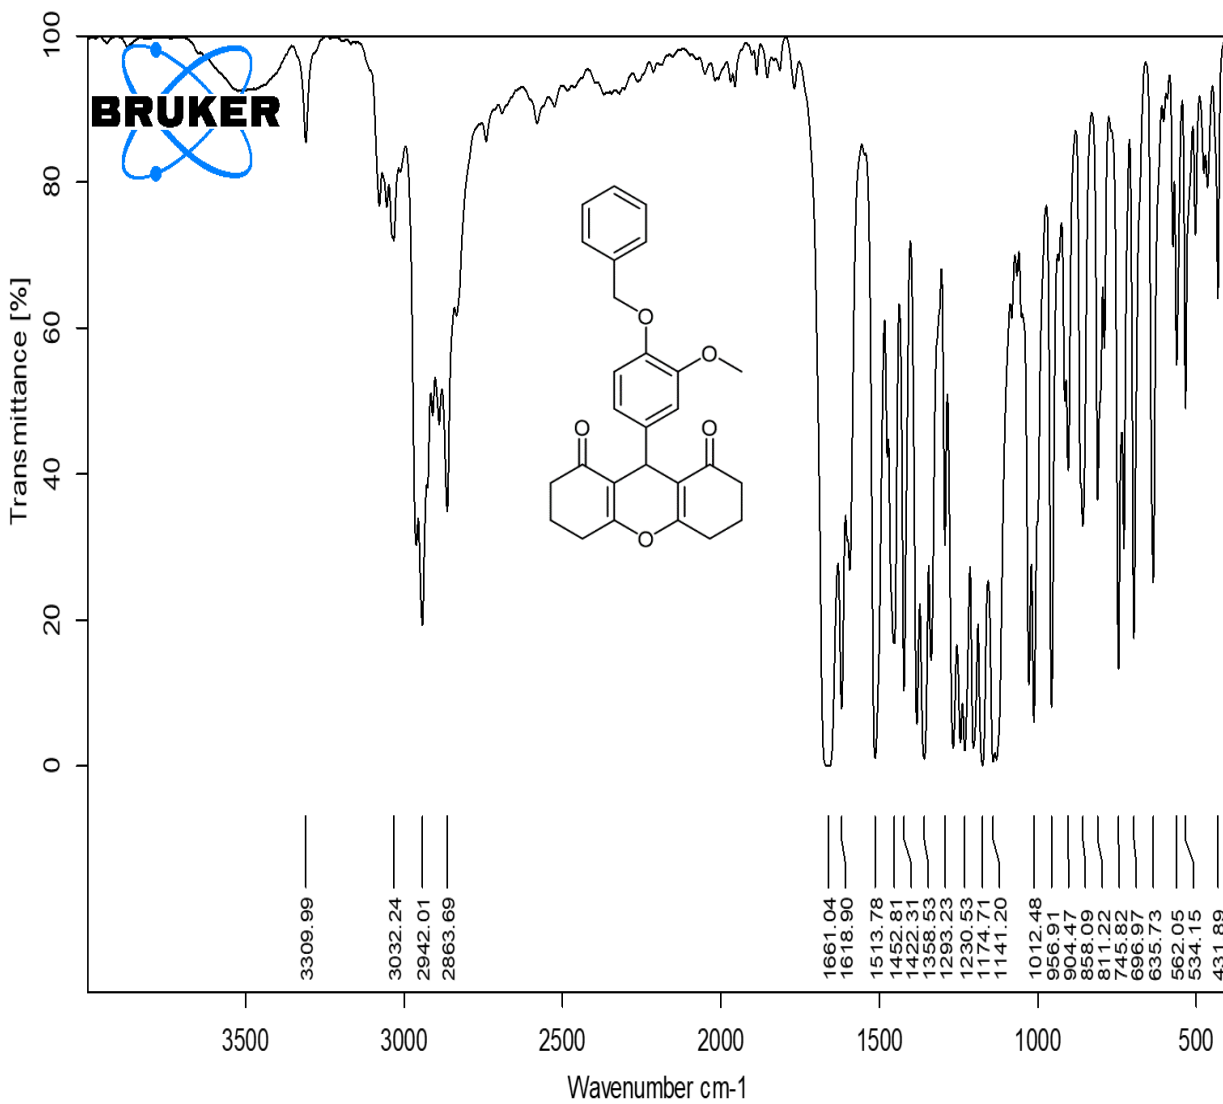

*IR spectrum of 4i*

# 4j Spectra

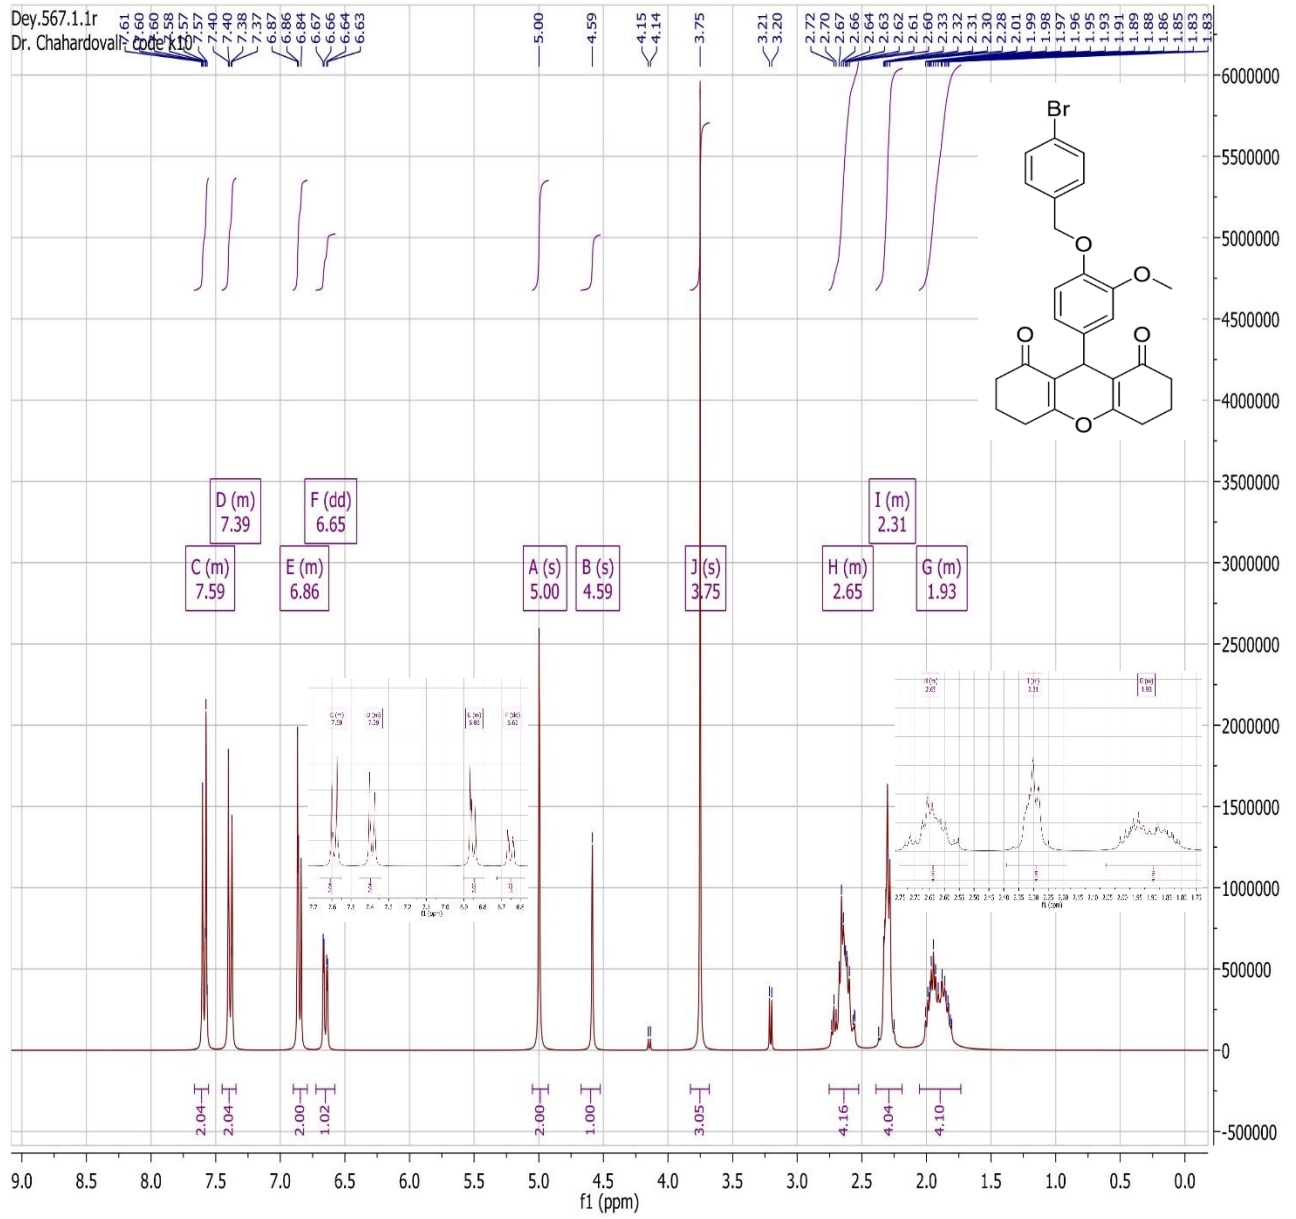

***<sup>1</sup>H-NMR spectrum of 4j***

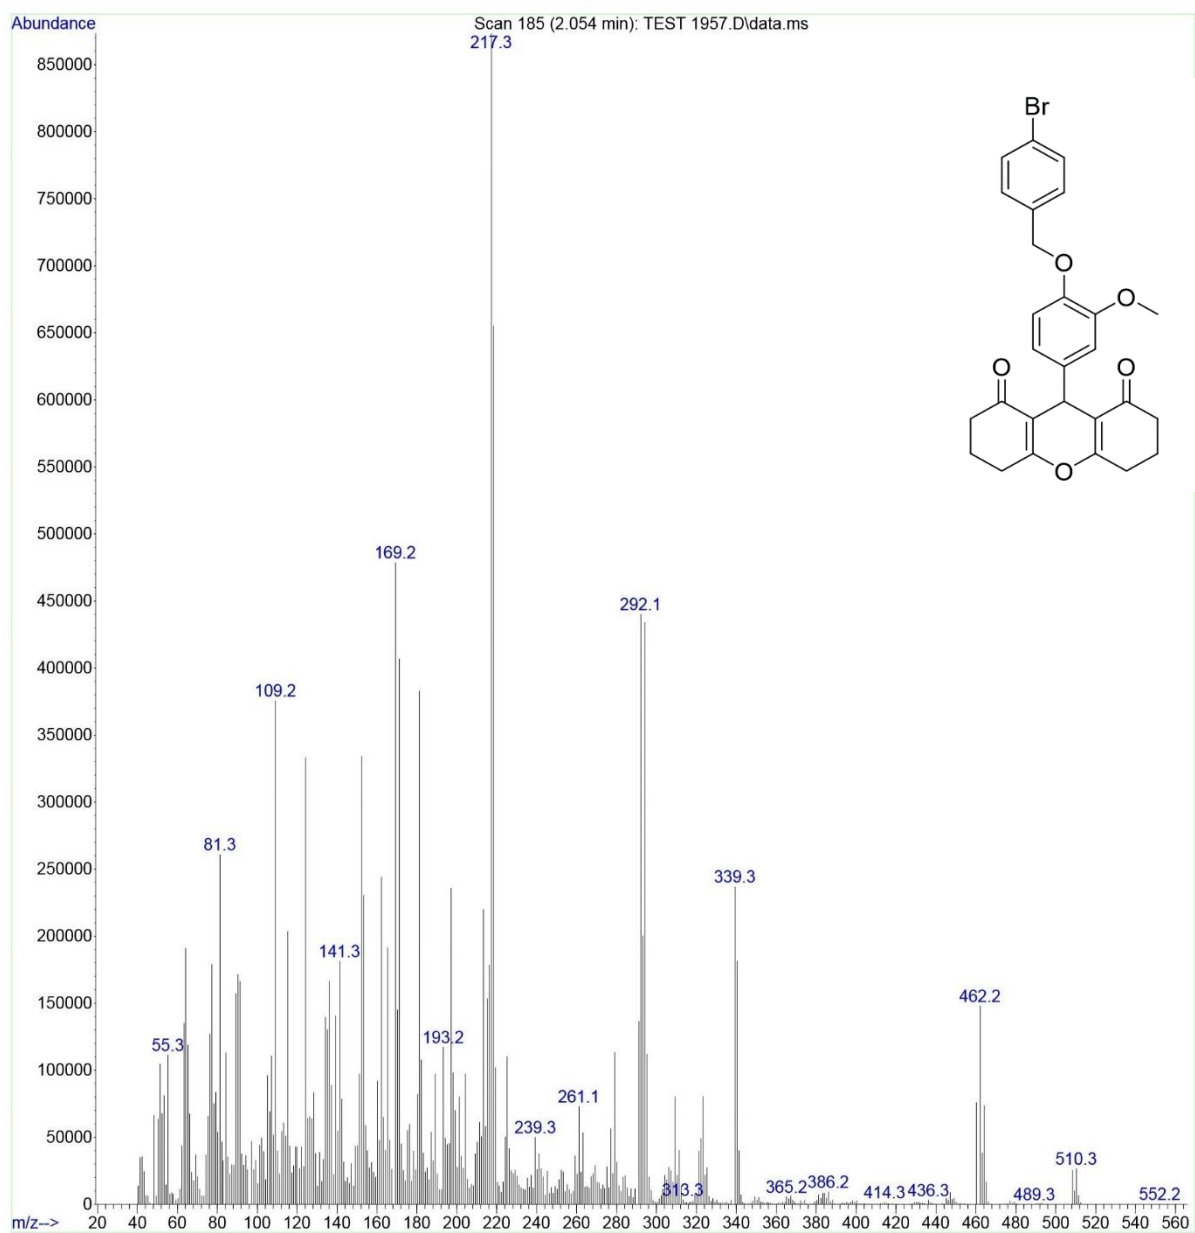

*Mass spectrum of 4j*

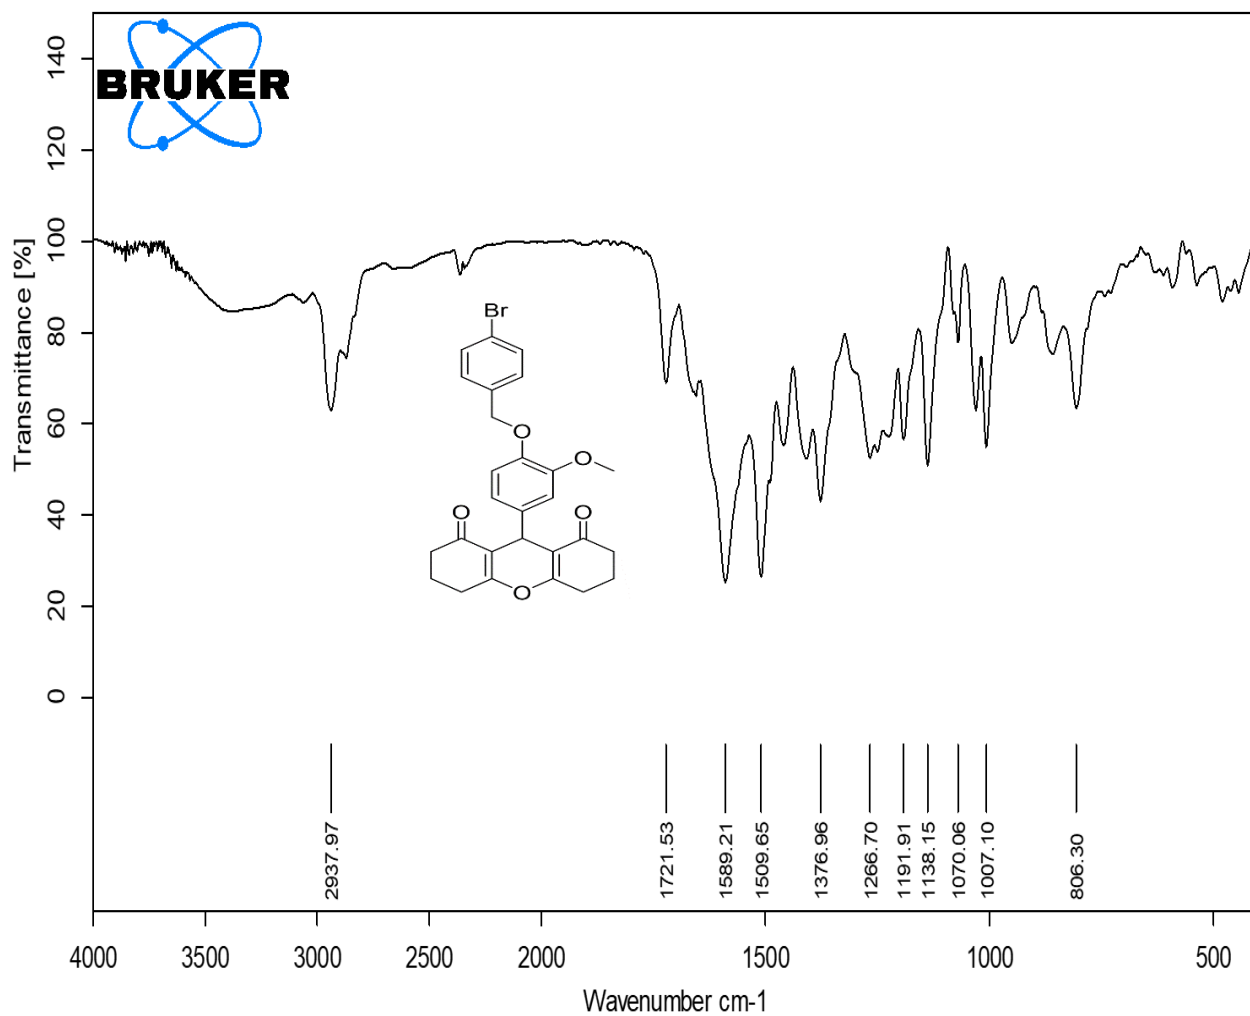

*IR spectrum of 4j*

# 4k Spectra

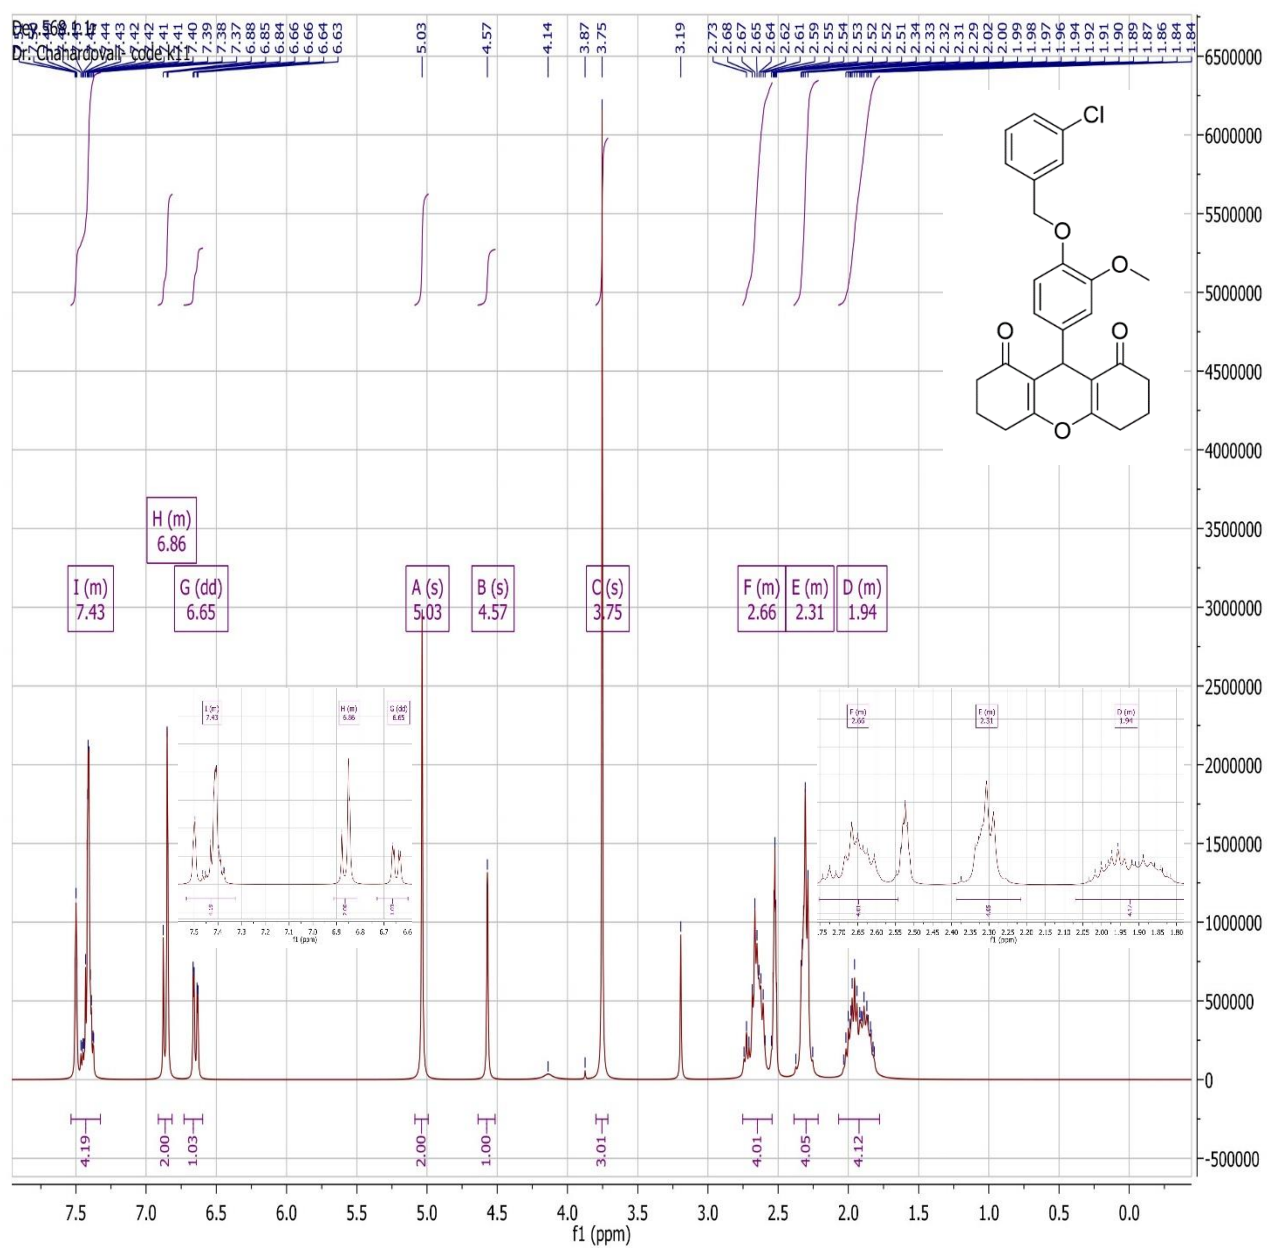

<sup>1</sup>H-NMR spectrum of 4k

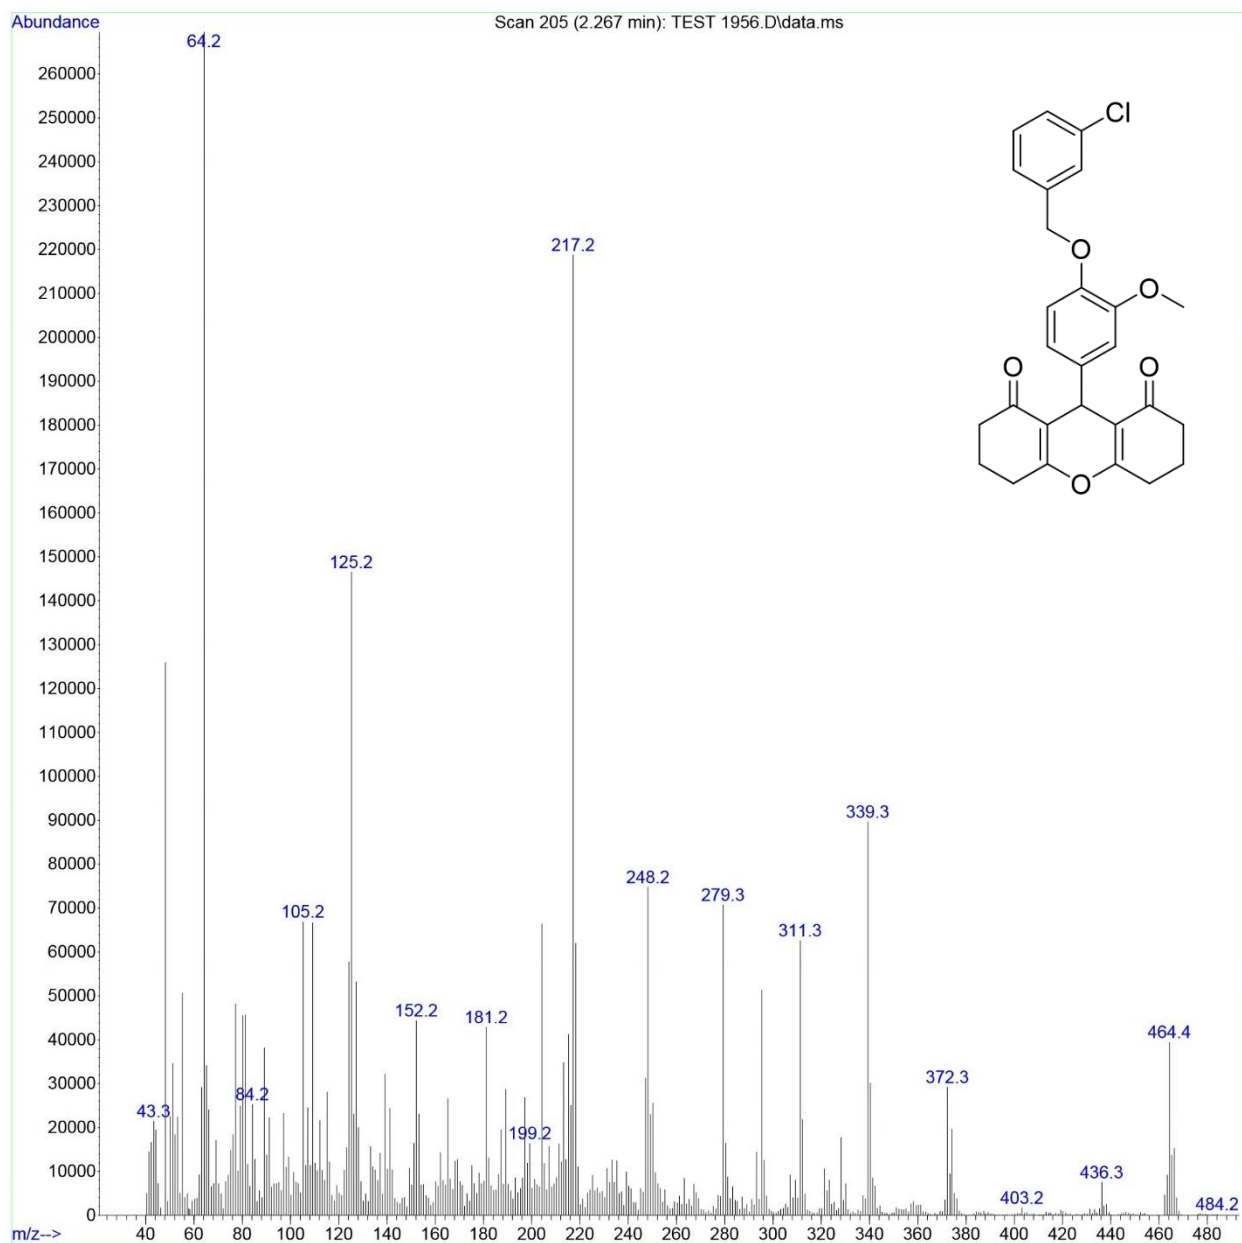

*Mass spectrum of 4k*



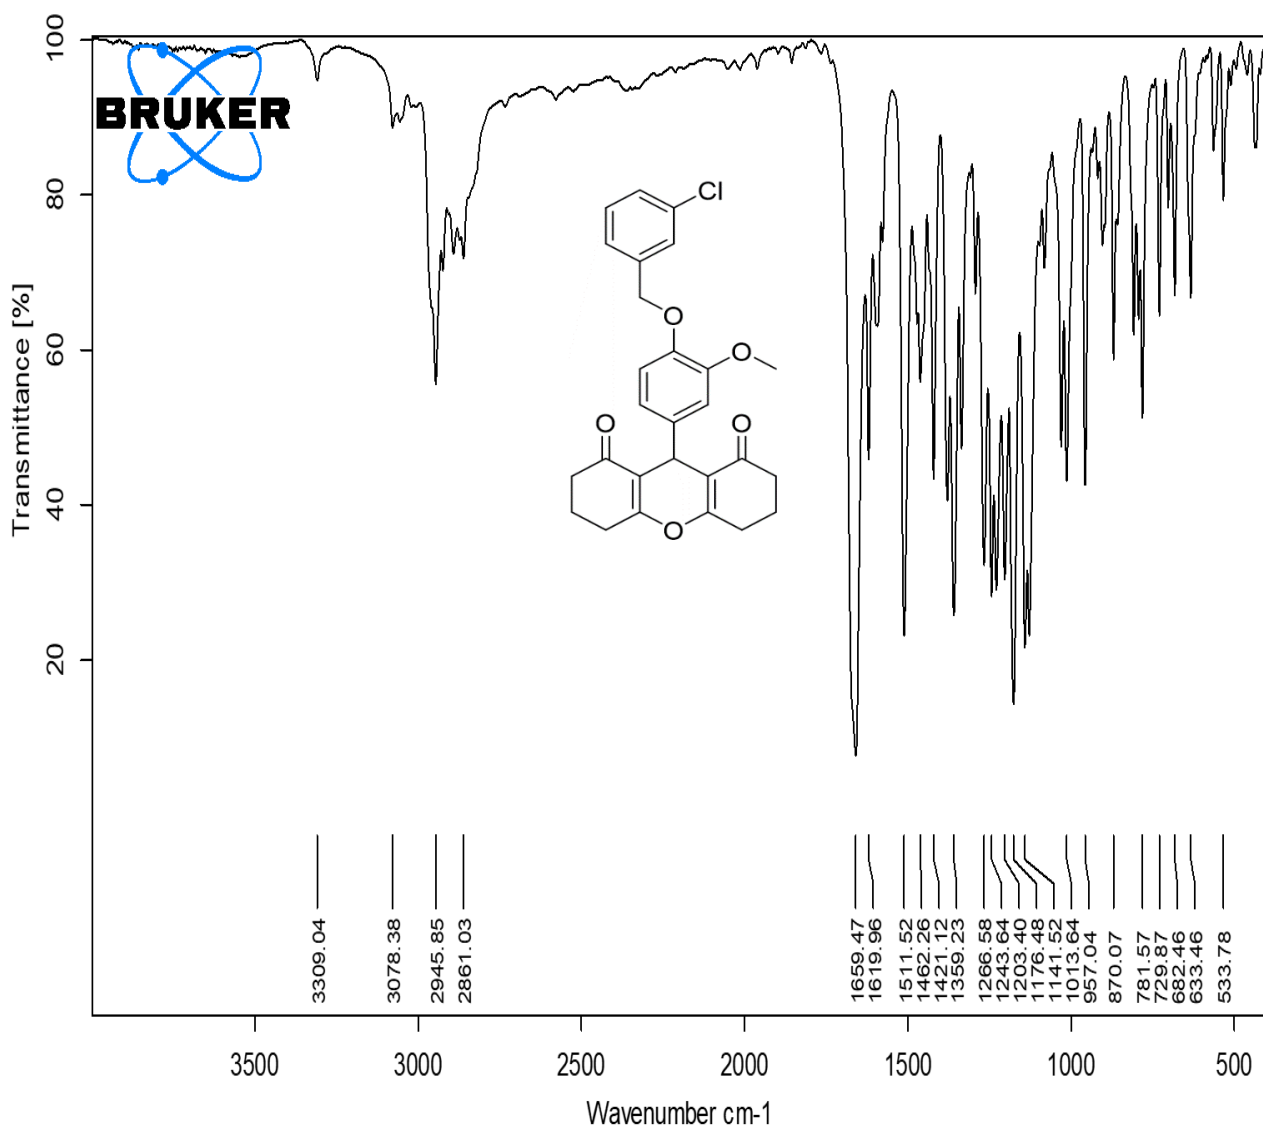

*IR spectrum of 4k*

## 4I Spectra

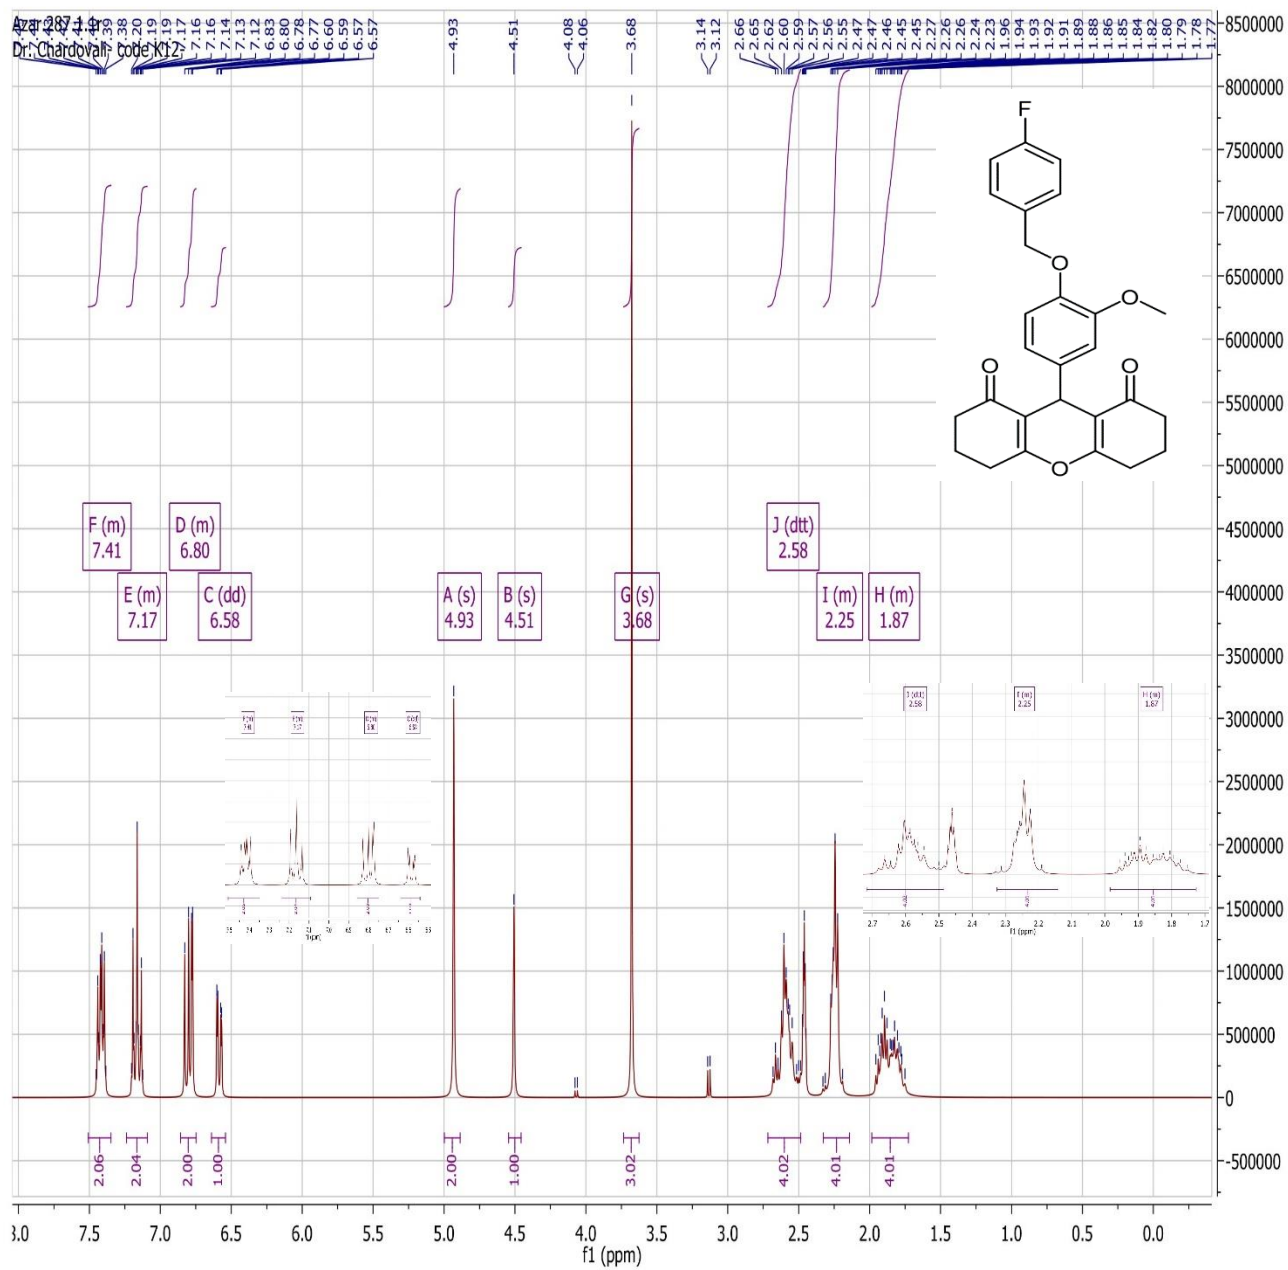

**<sup>1</sup>H-NMR spectrum of 4I**

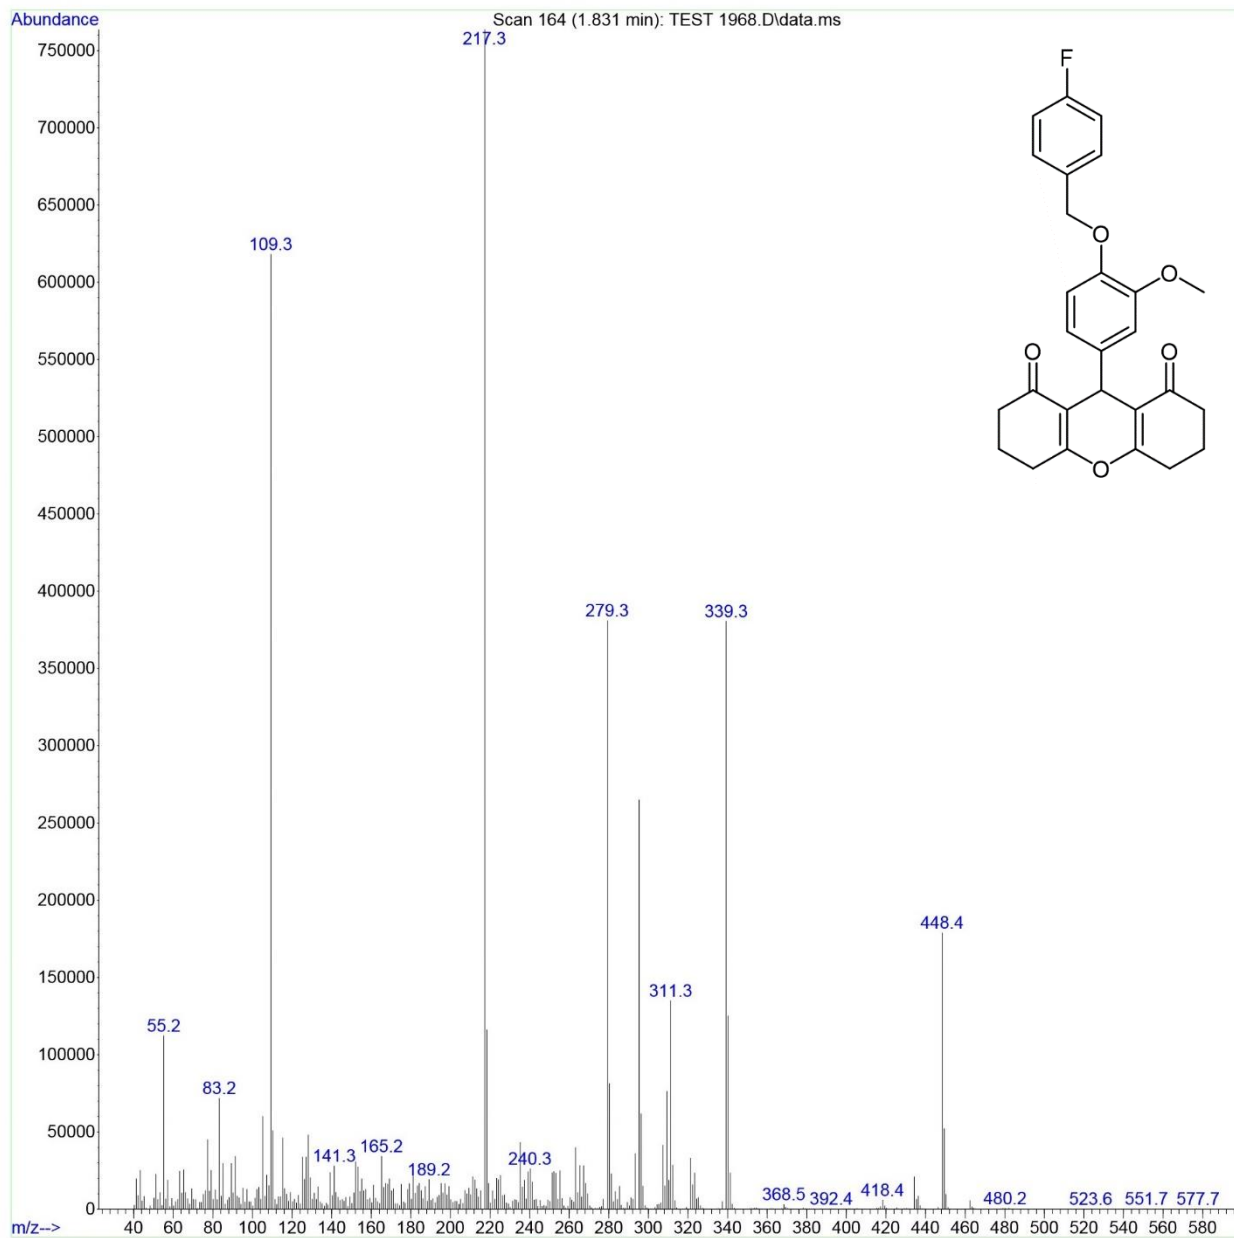

**Mass spectrum of 4I**

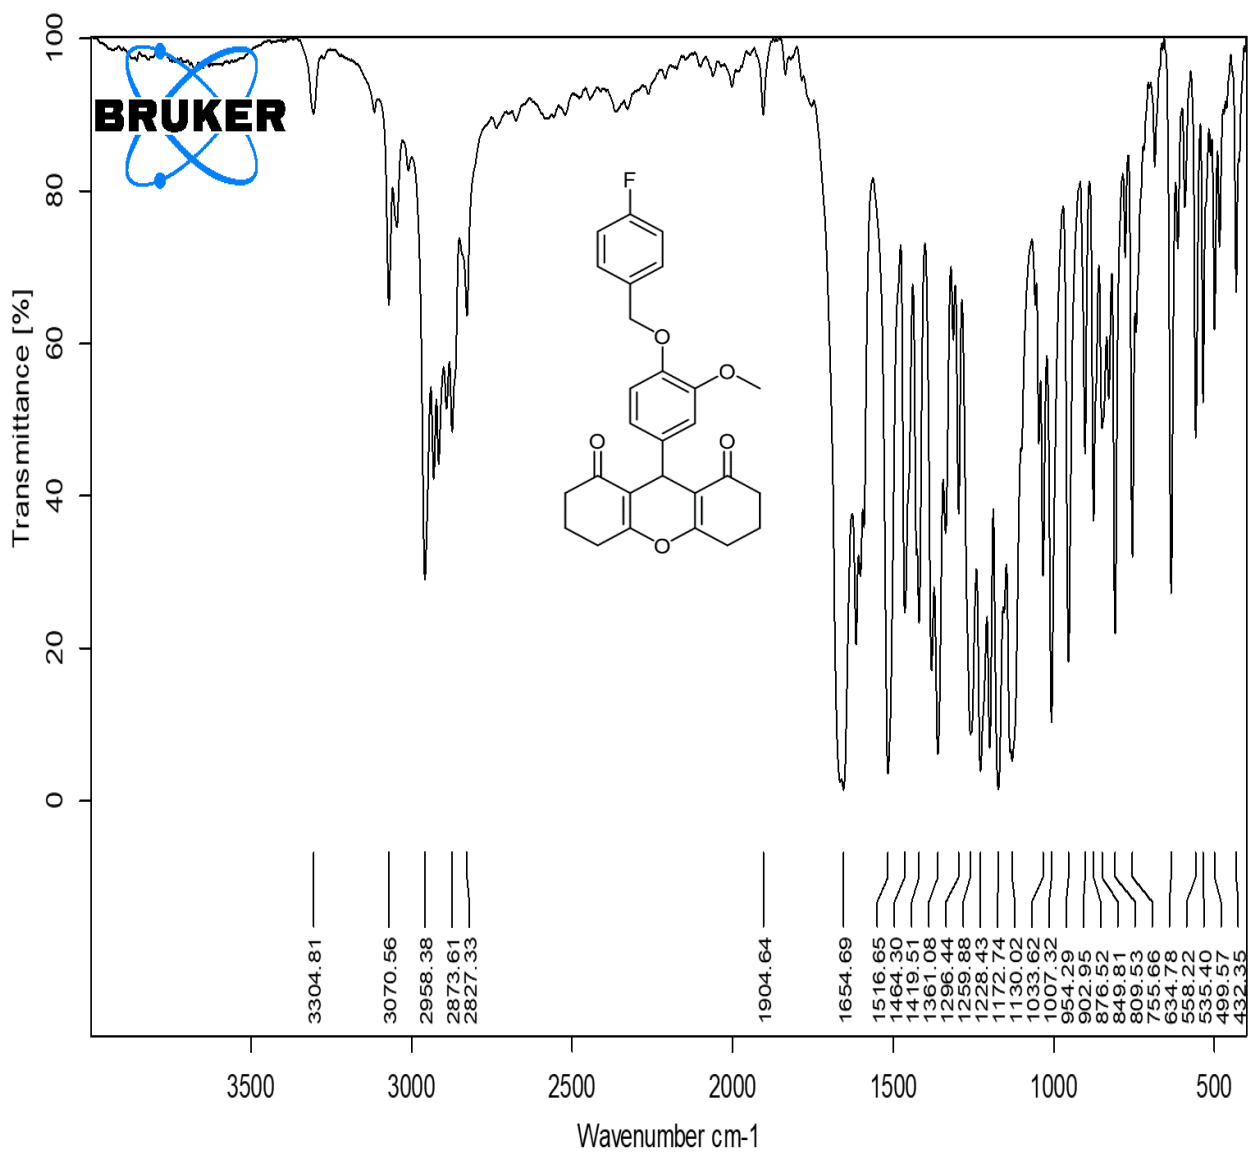

IR spectrum of 4I

## 4m Spectra

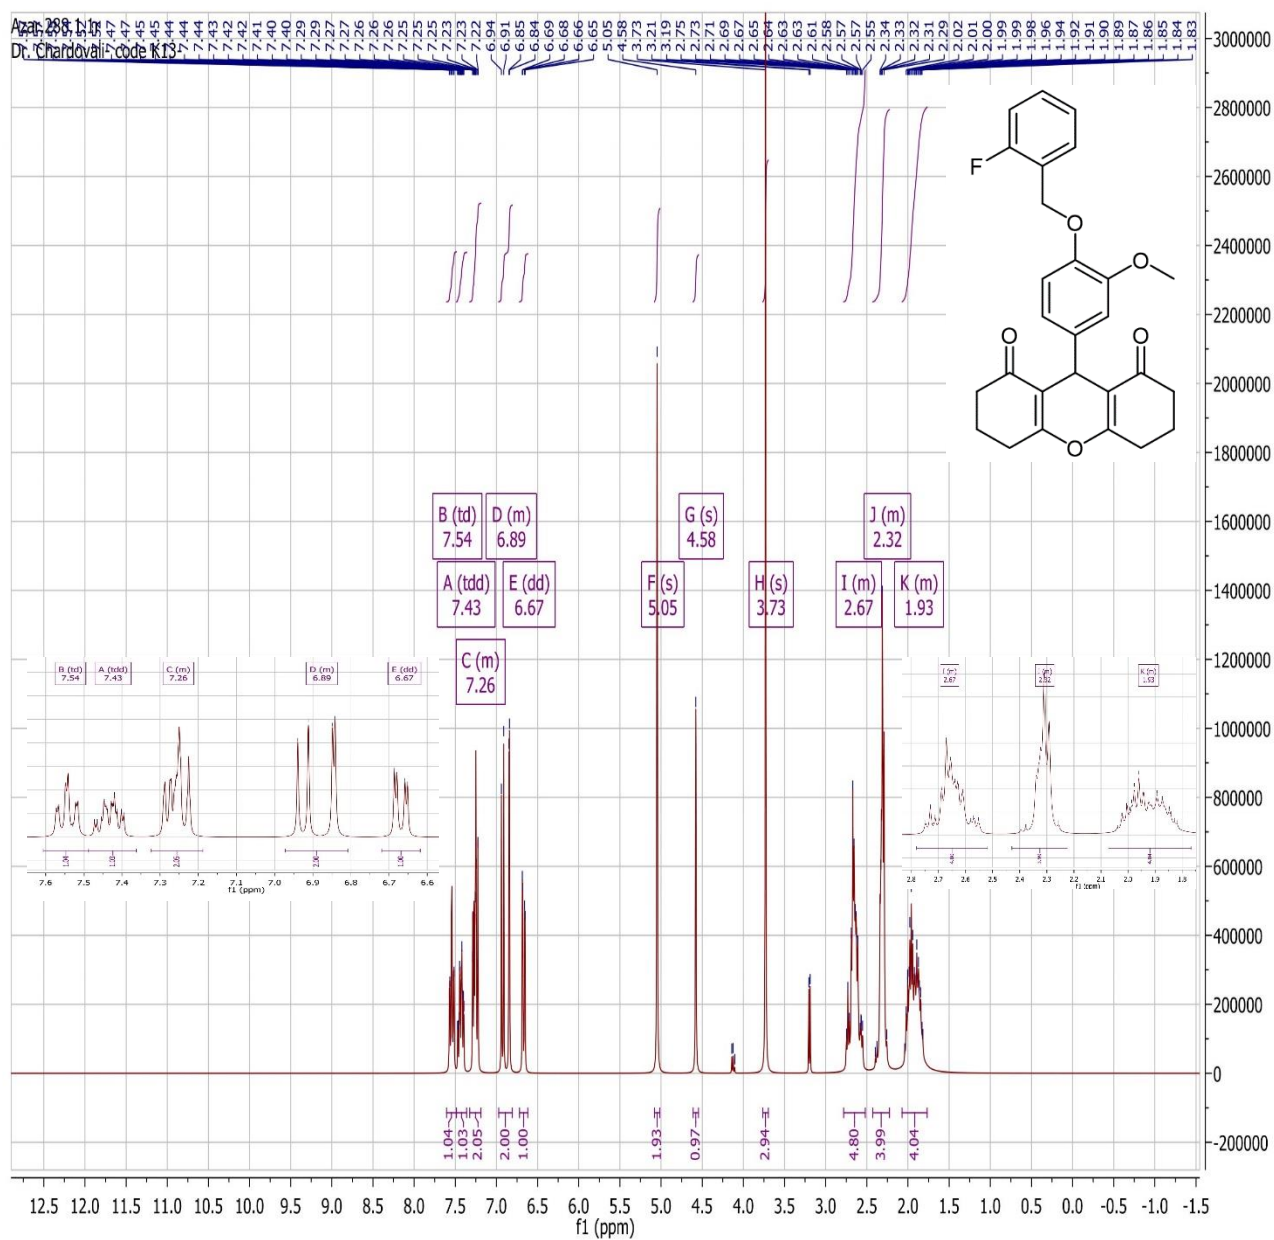

**<sup>1</sup>H-NMR spectrum of 4m**

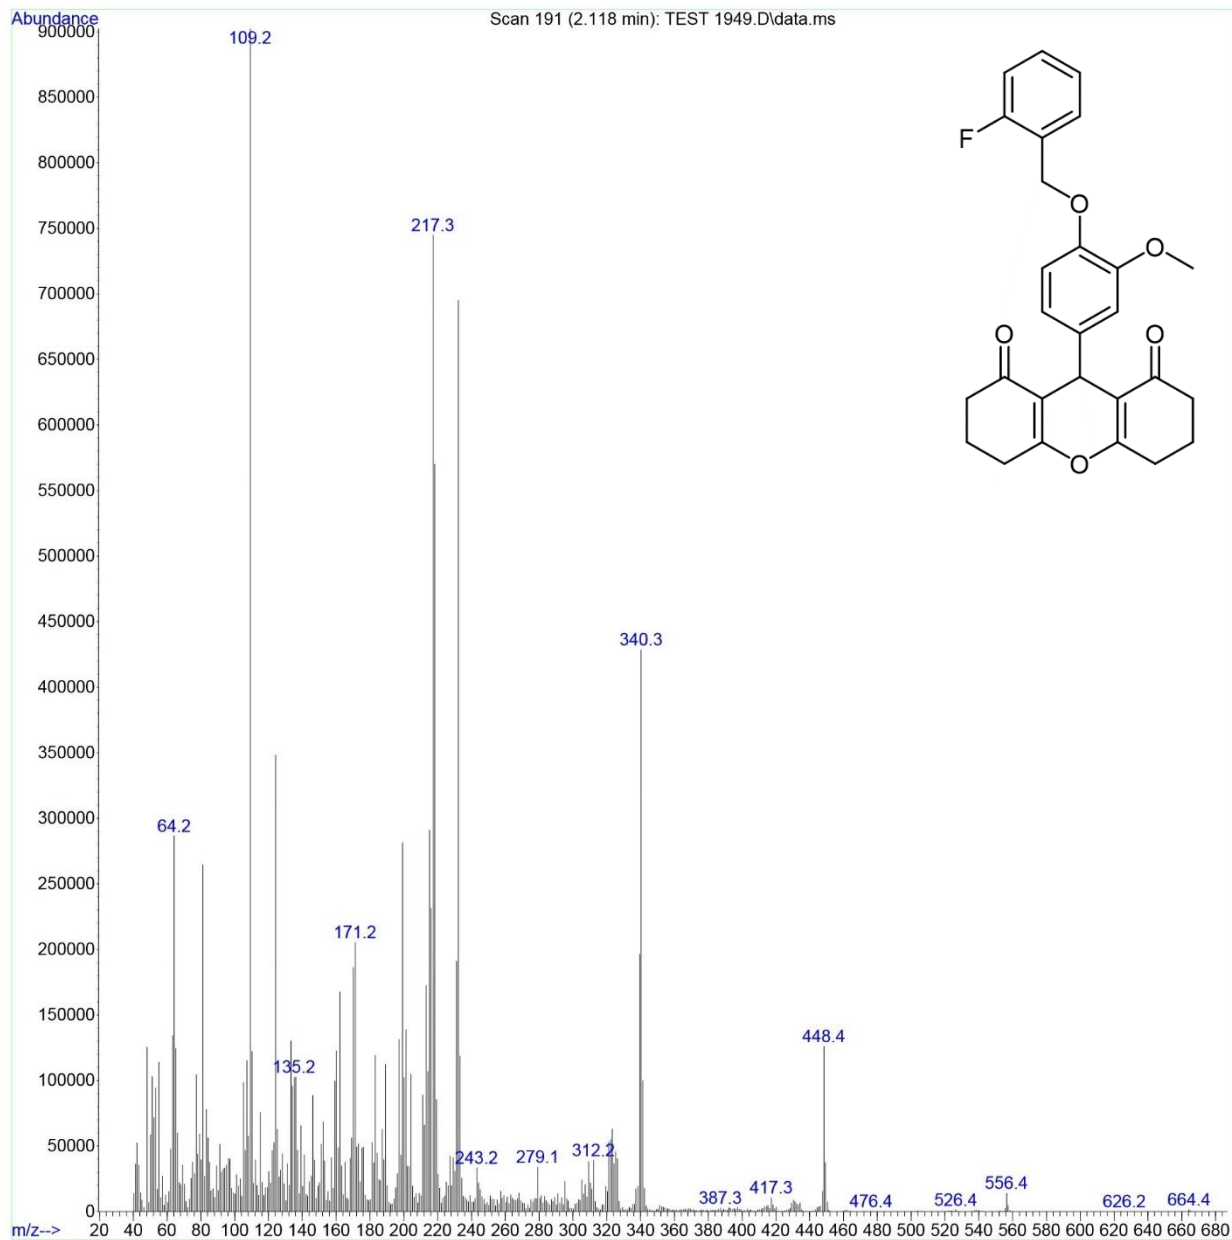

Mass spectrum of 4m

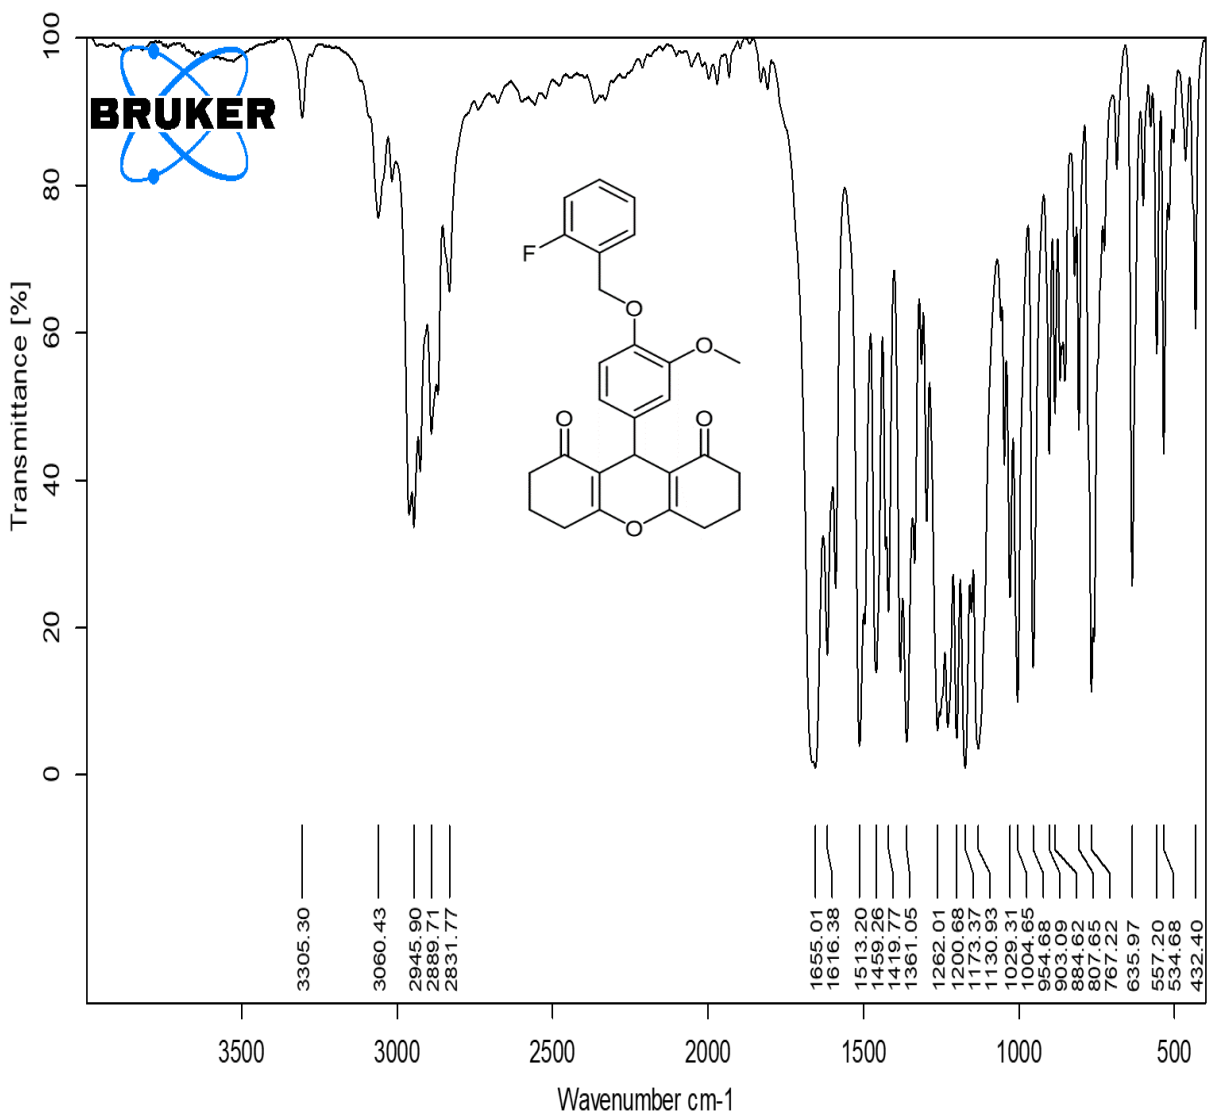

***IR spectrum of 4m***

## 4n Spectra

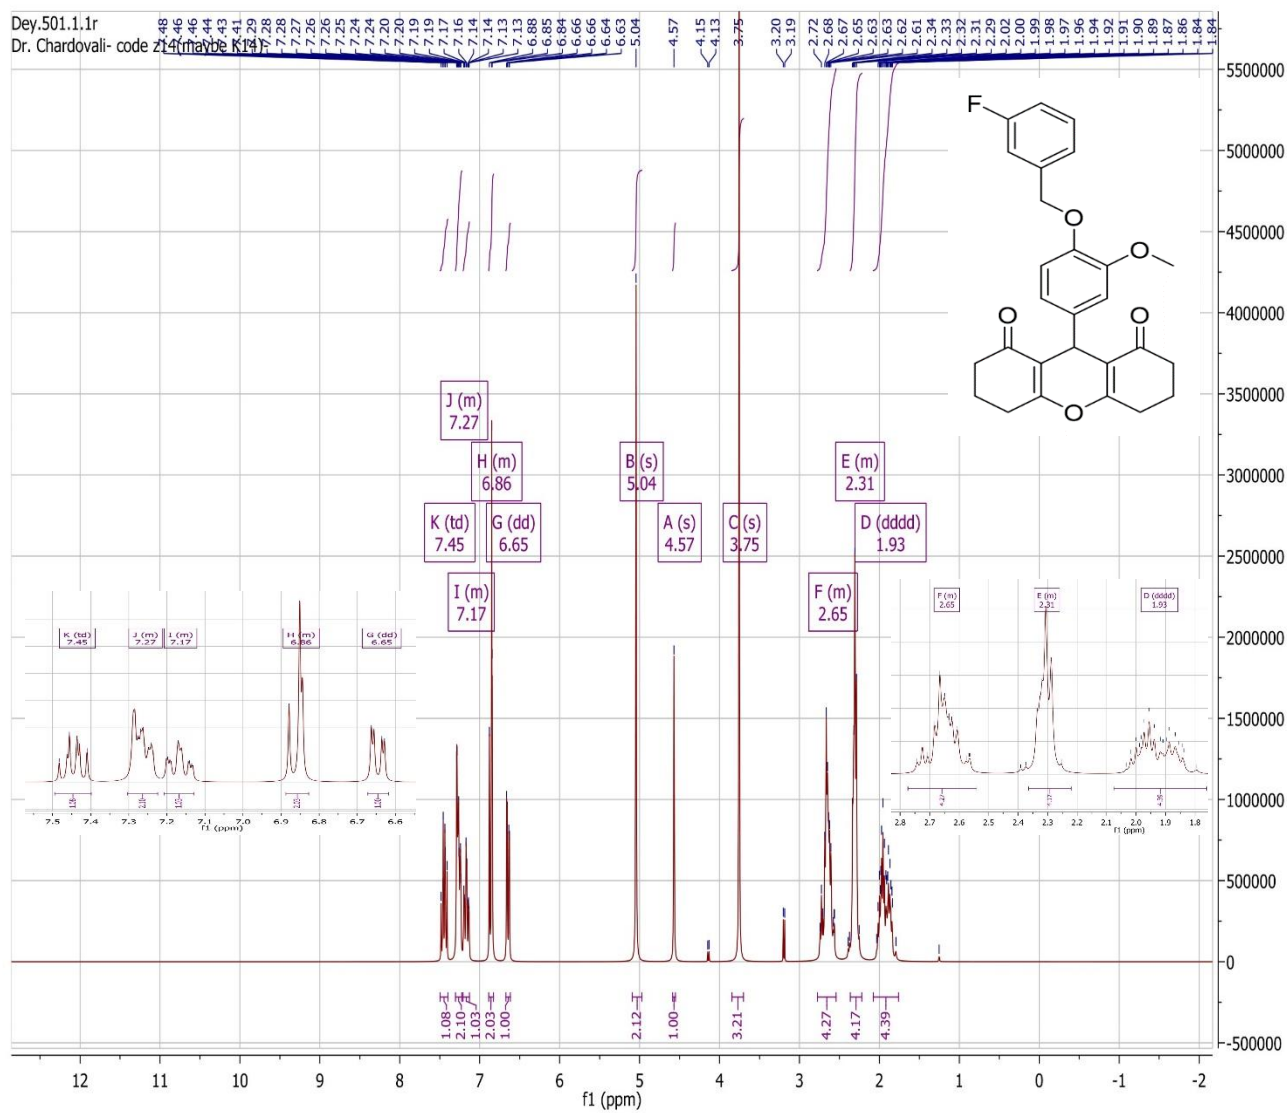

*<sup>1</sup>H-NMR spectrum of 4n*



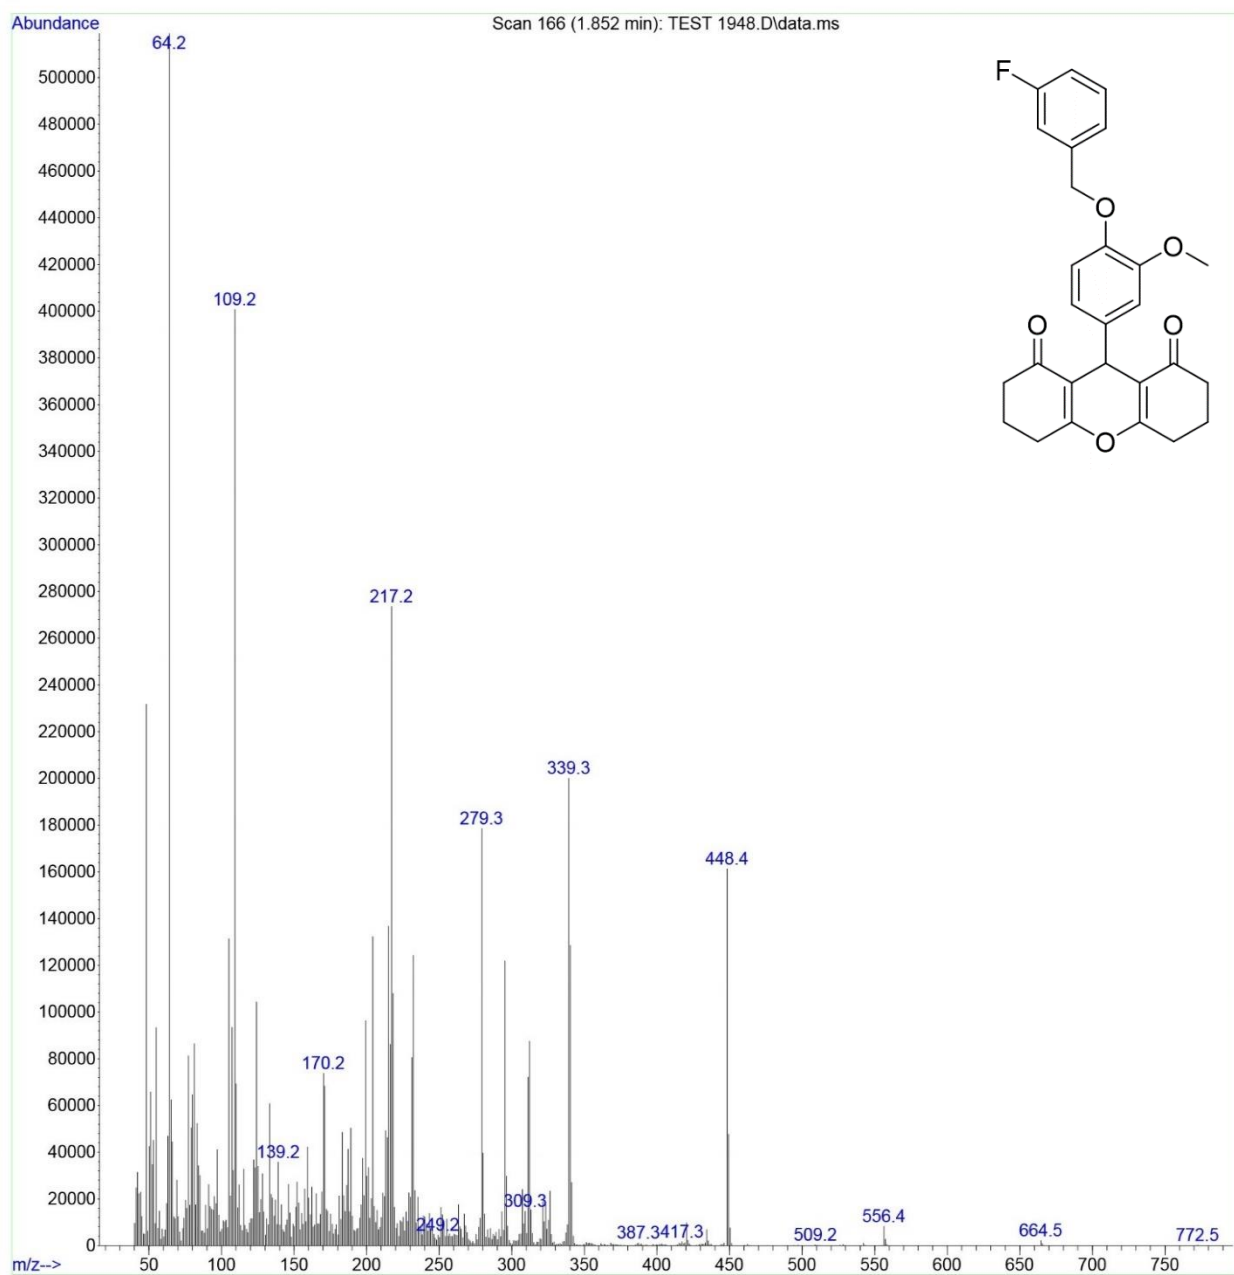

*Mass spectrum of 4n*

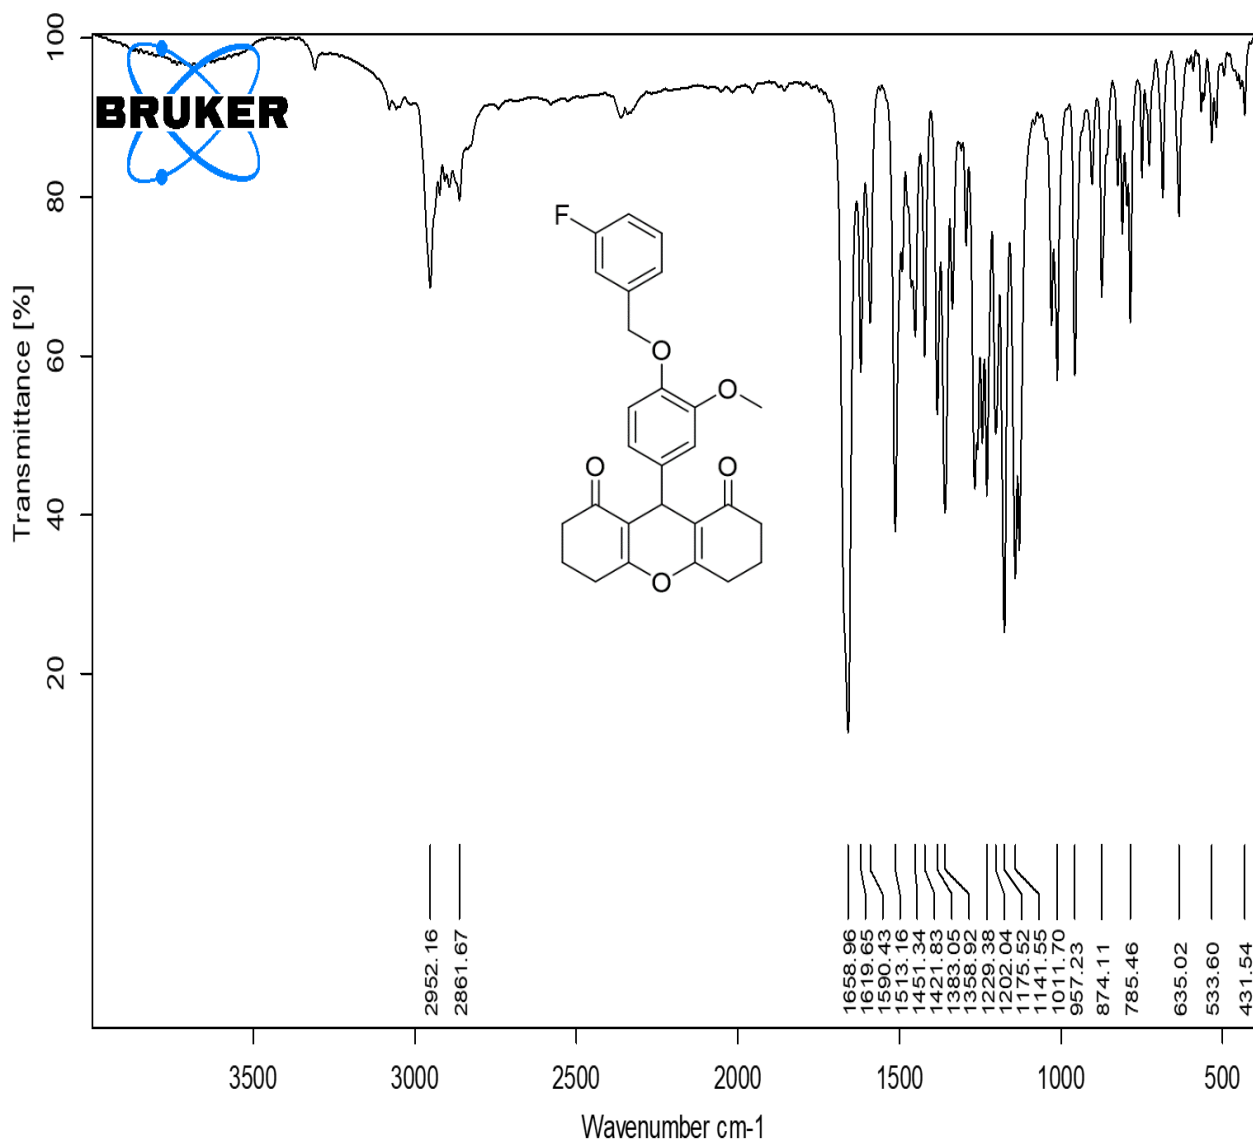

*IR spectrum of 4n*

## 4o Spectra

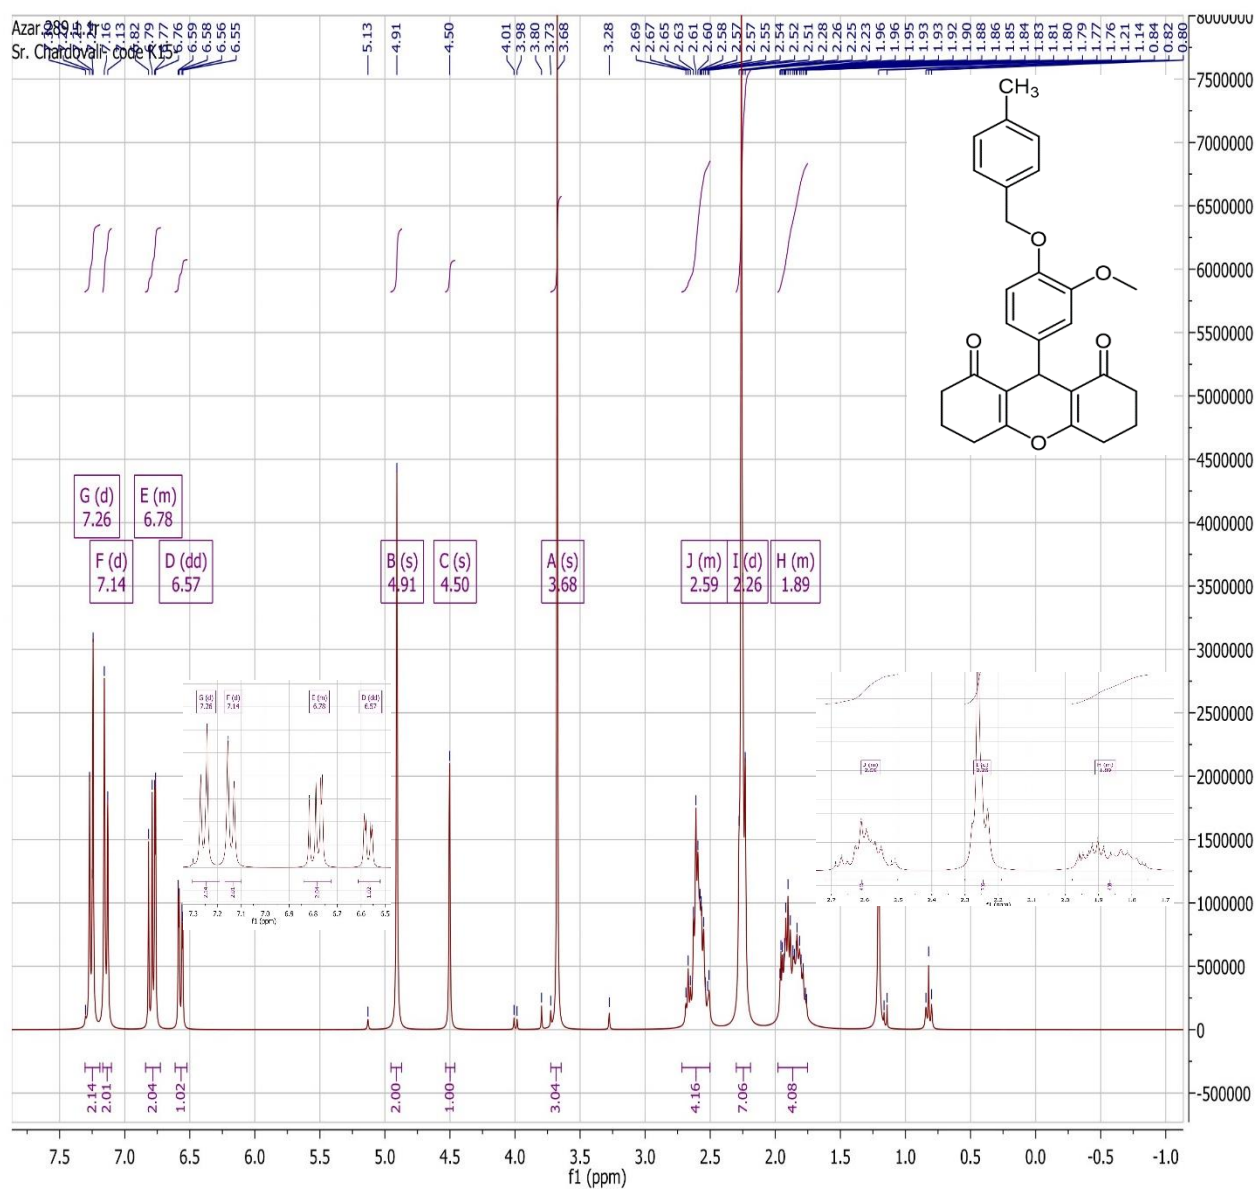

*<sup>1</sup>H-NMR spectrum of 4o*

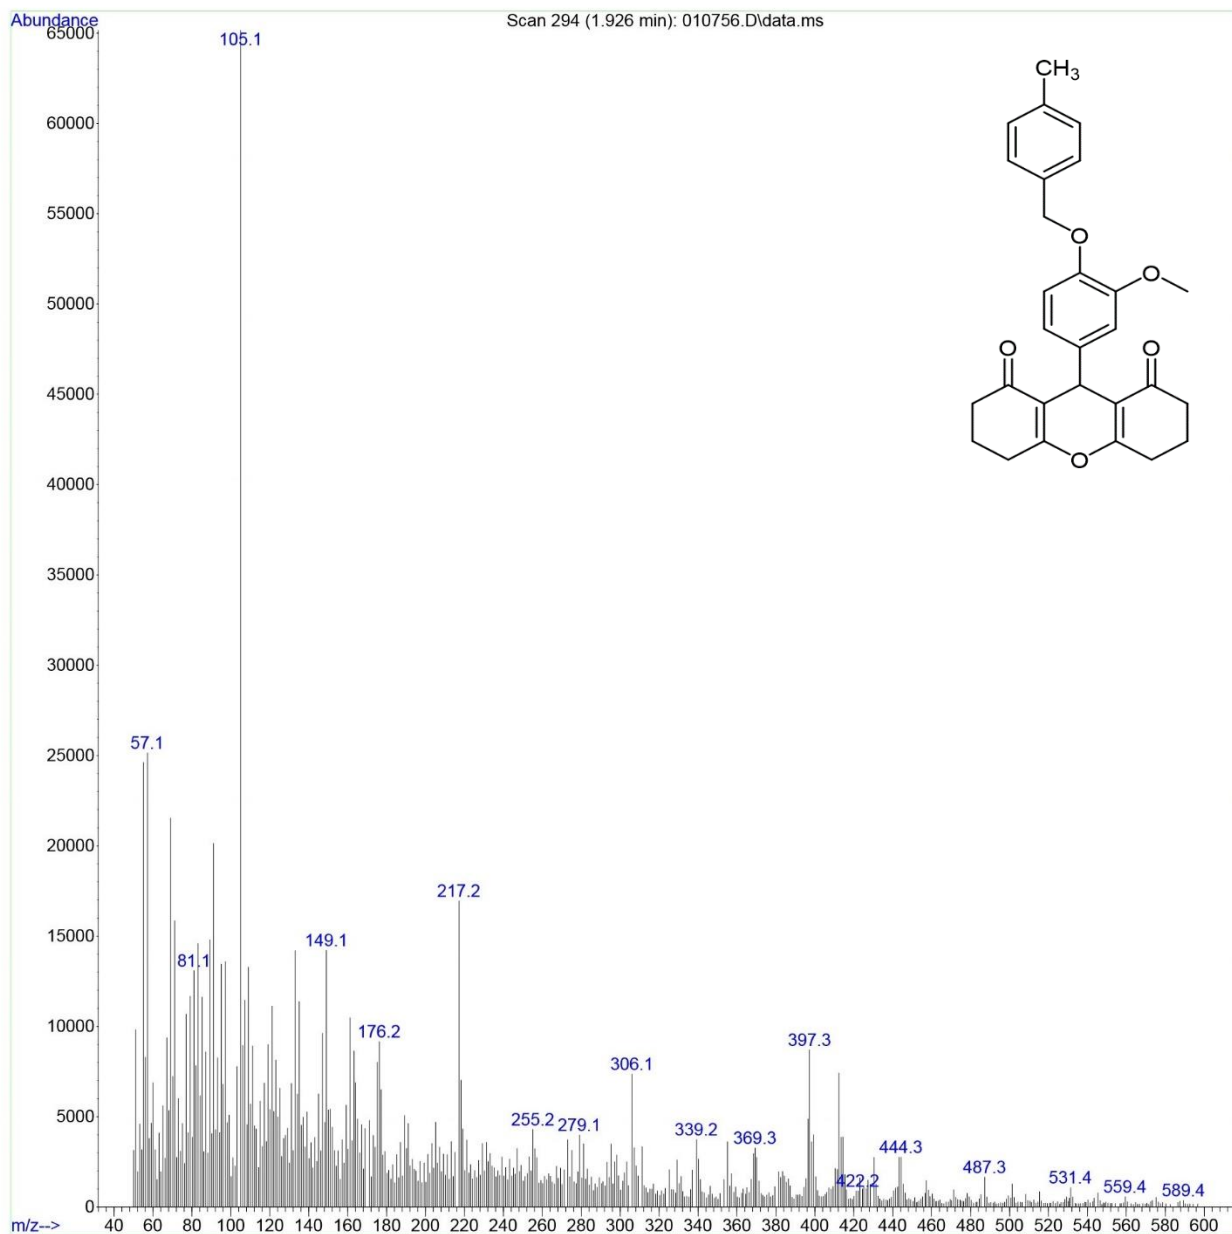

*Mass spectra of 4o*

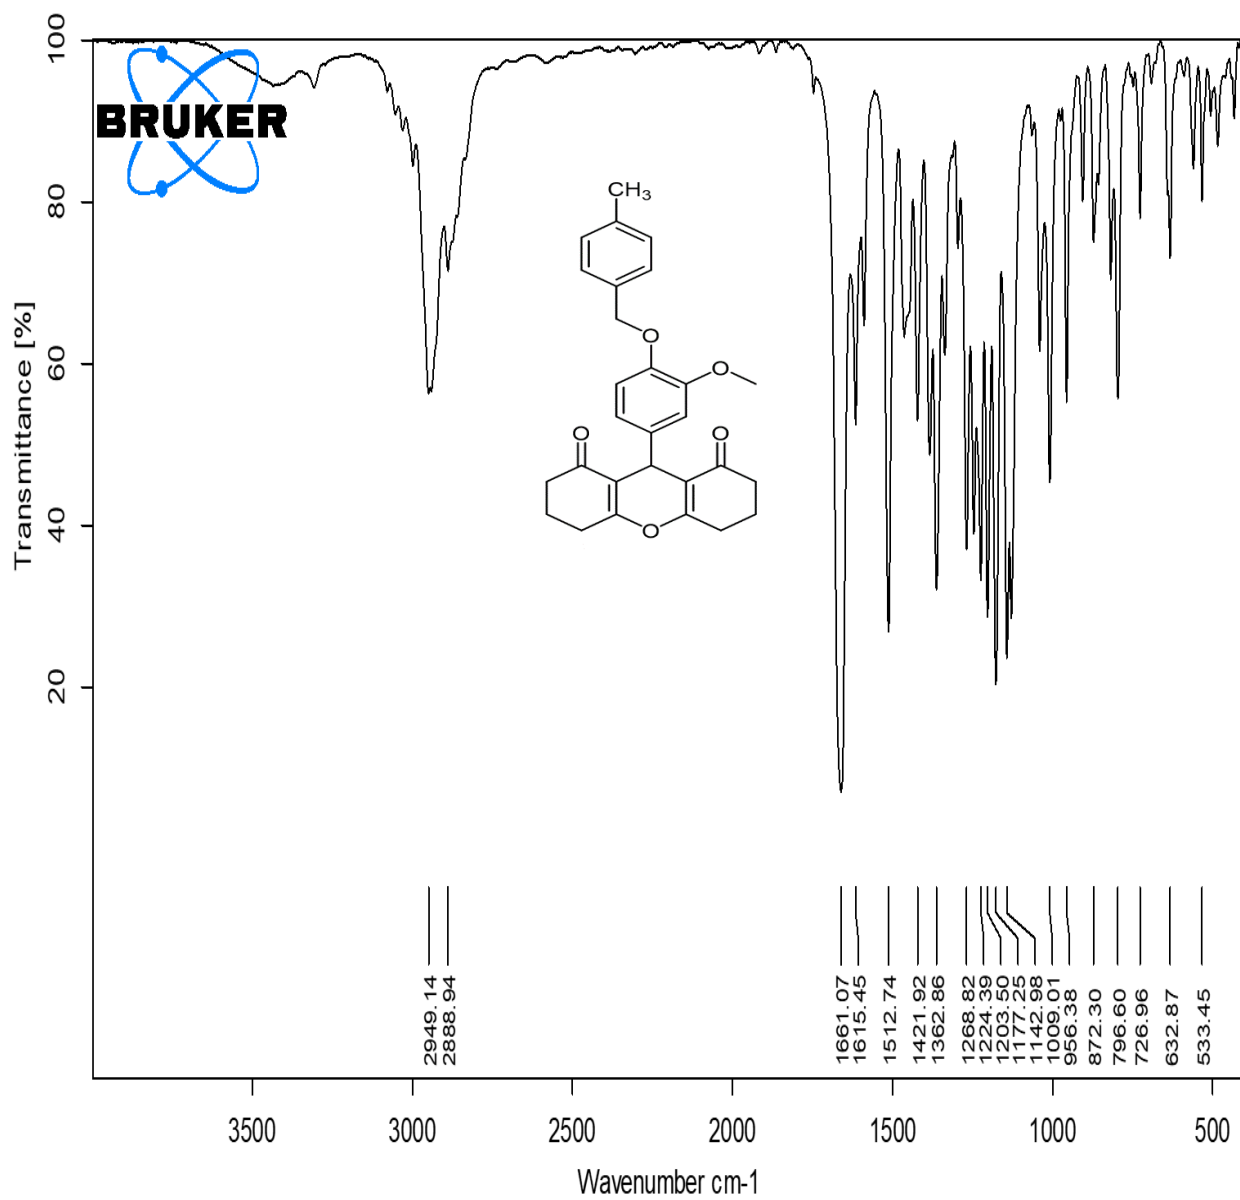

*IR spectrum of 4o*

## 4p Spectra

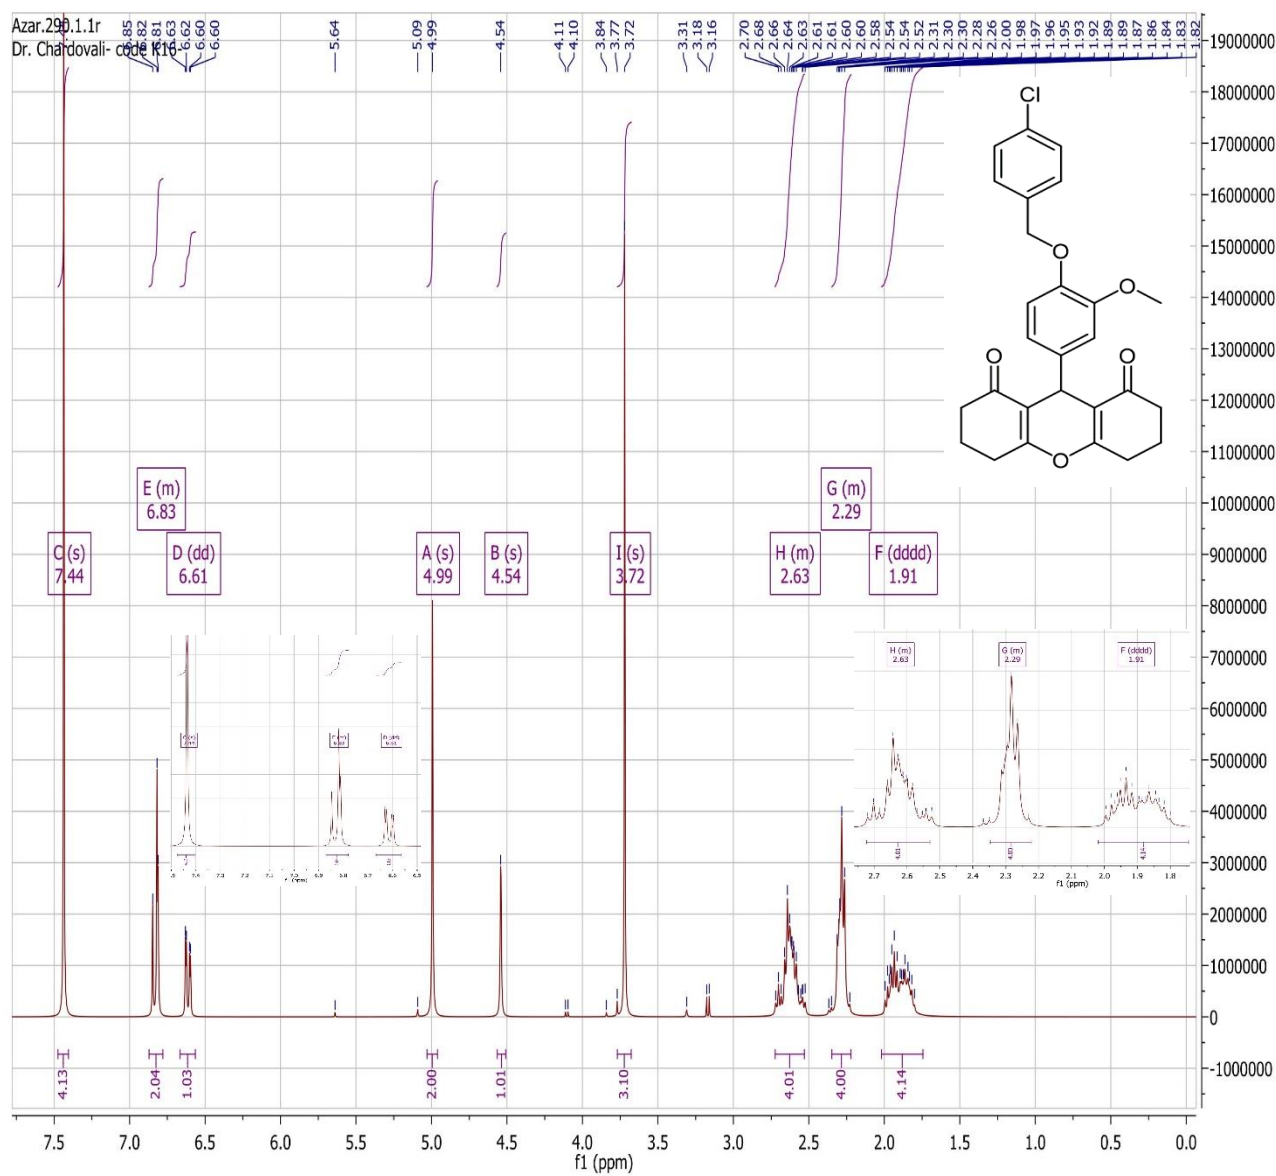

*<sup>1</sup>H-NMR spectrum of 4p*

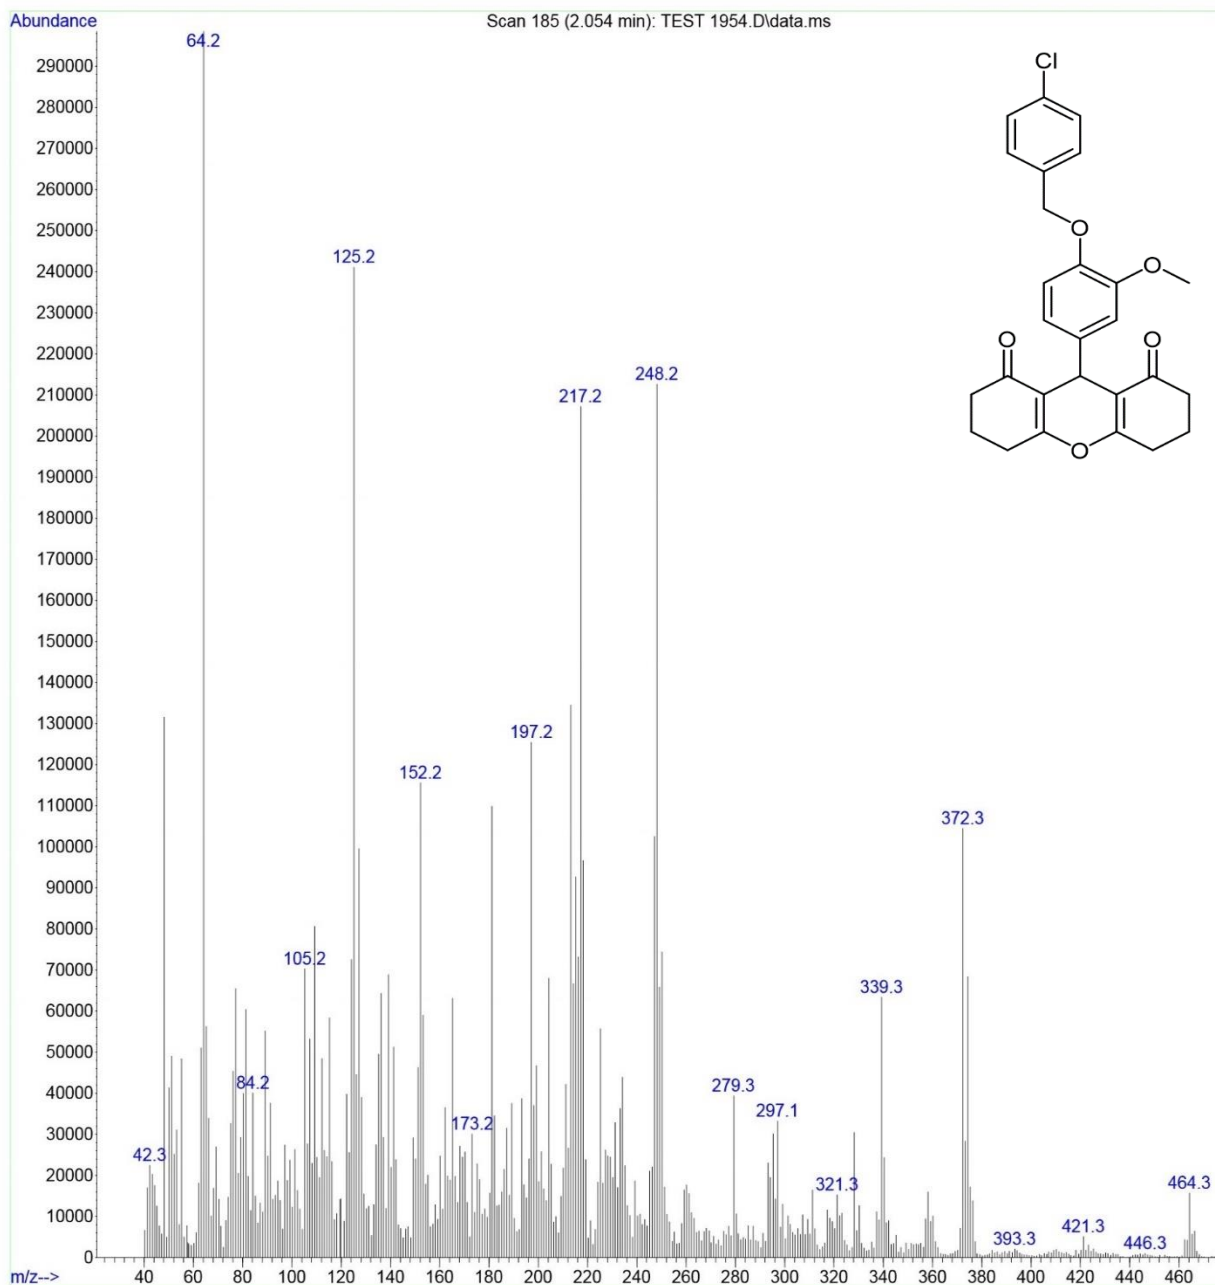

**Mass spectrum of 4p**

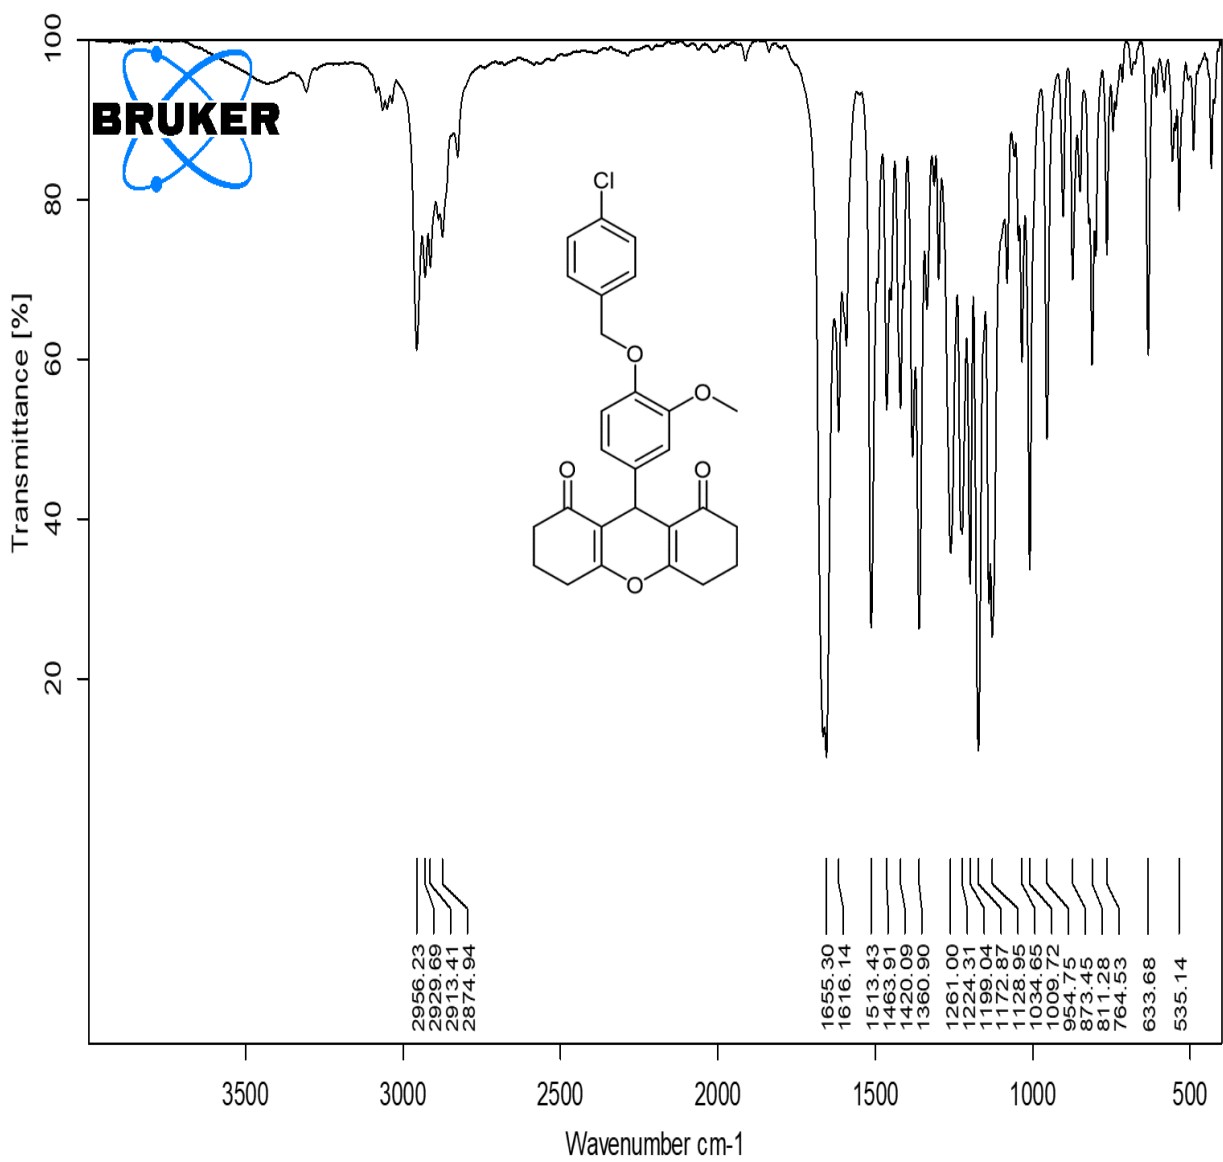

*IR spectrum of 4p*



## 4q Spectra

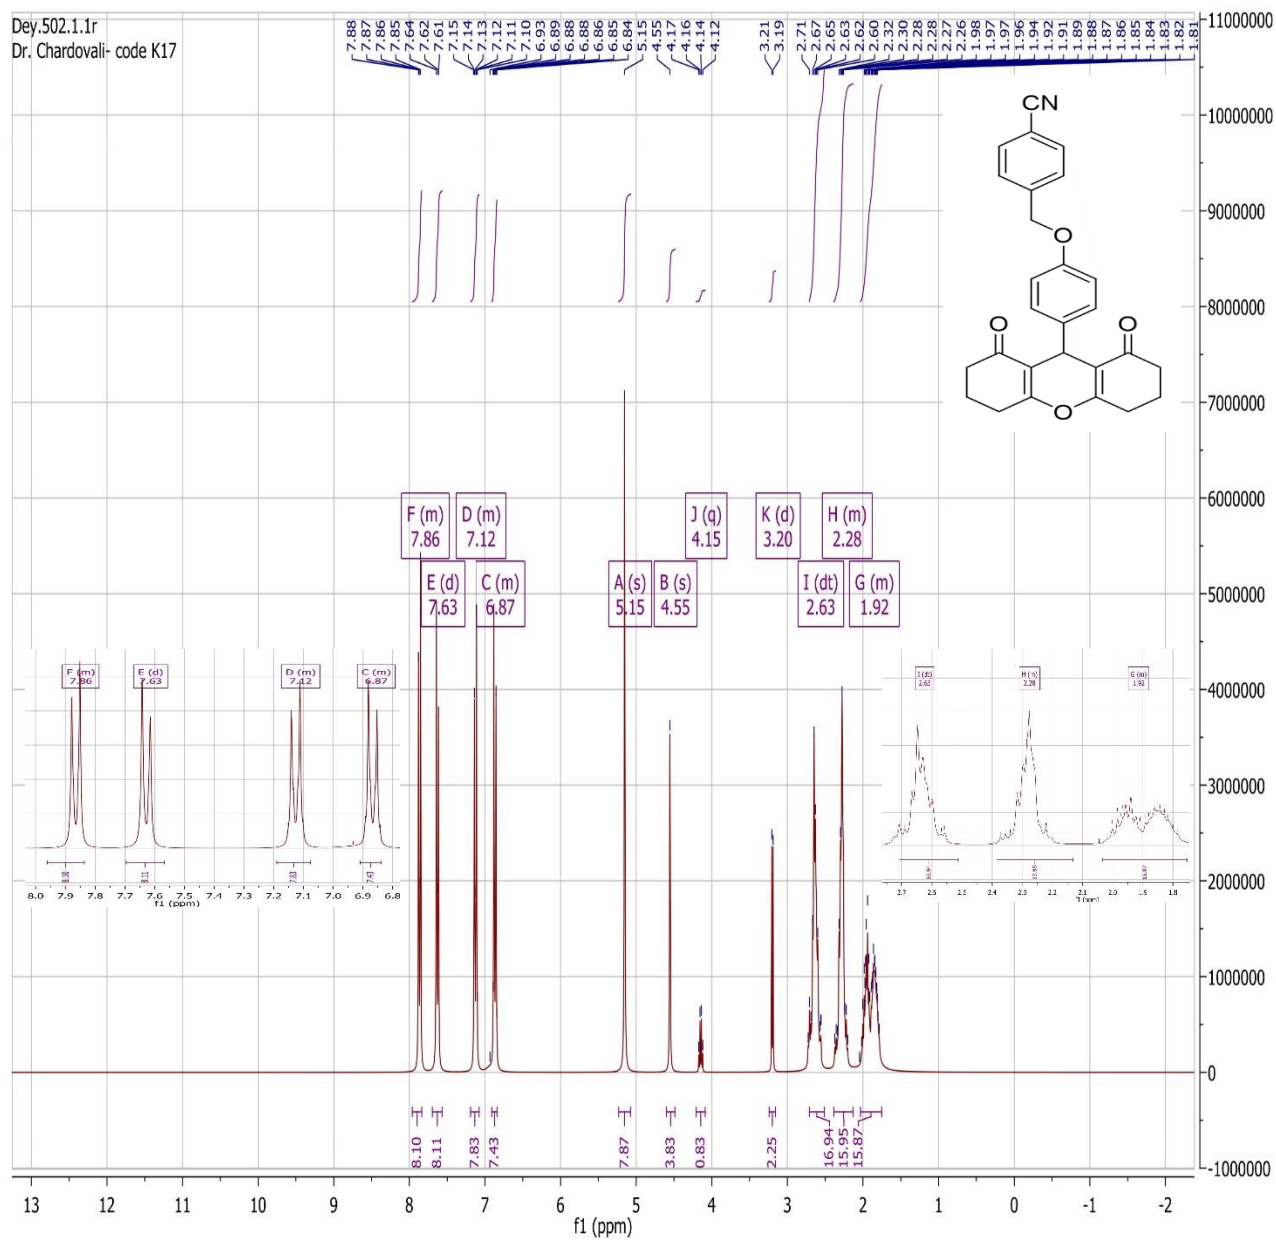

*<sup>1</sup>H-NMR spectrum of 4q*

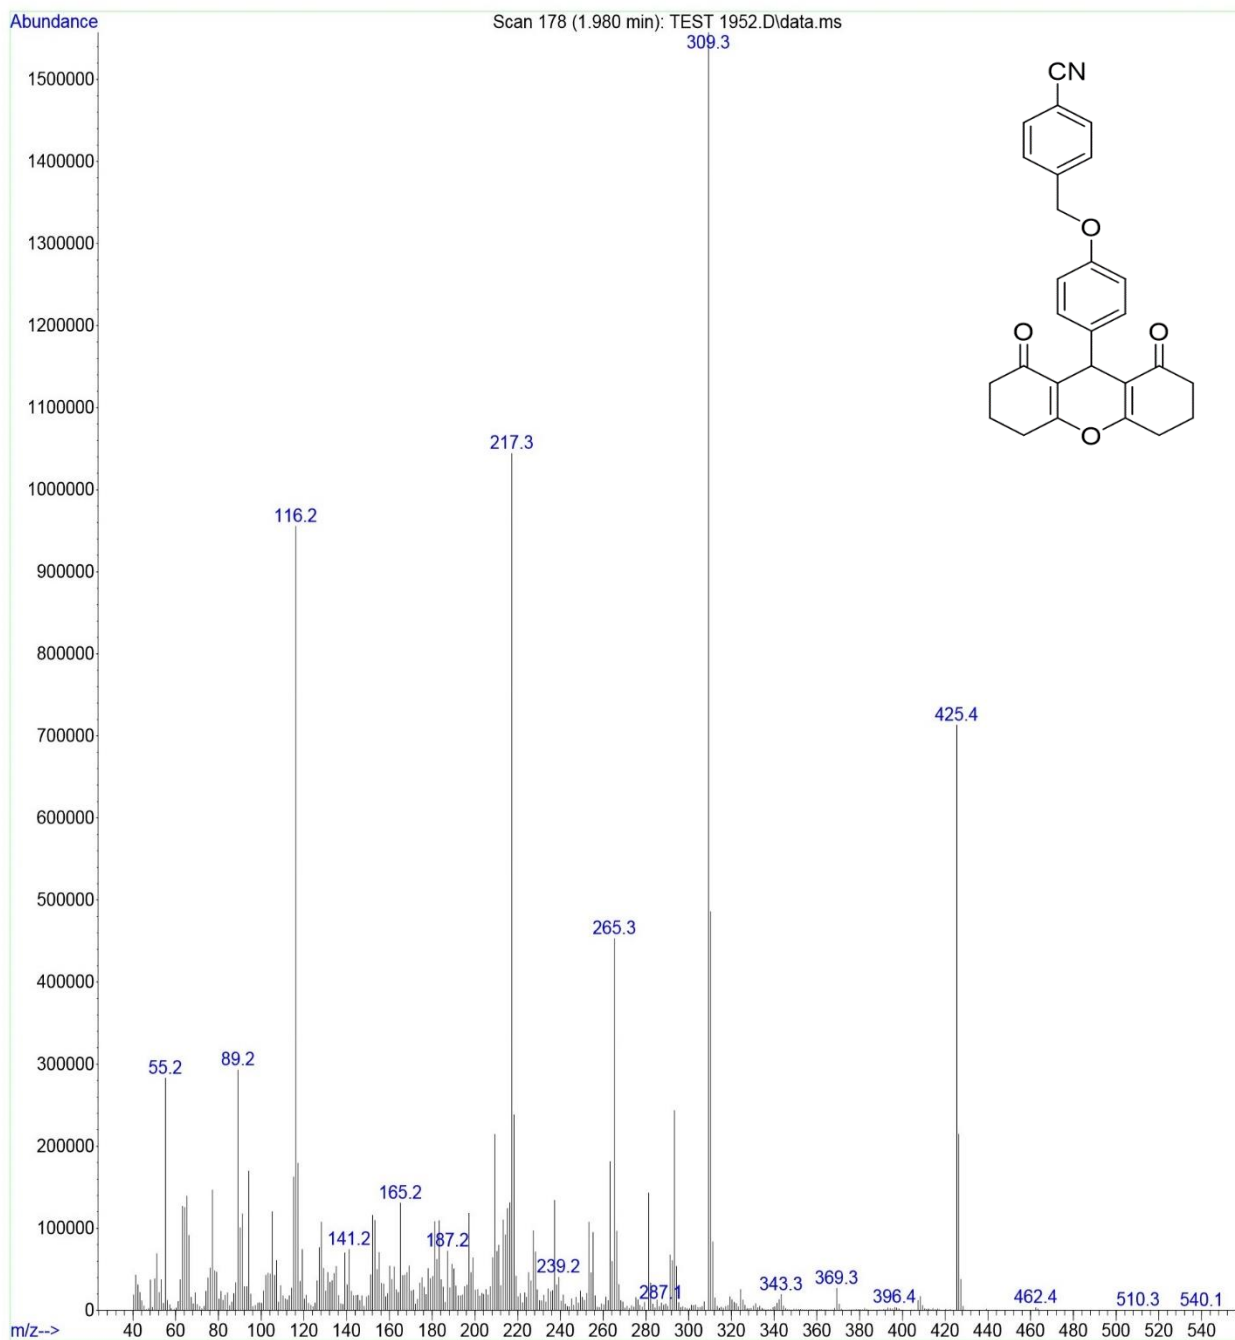

*Mass spectrum of 4q*

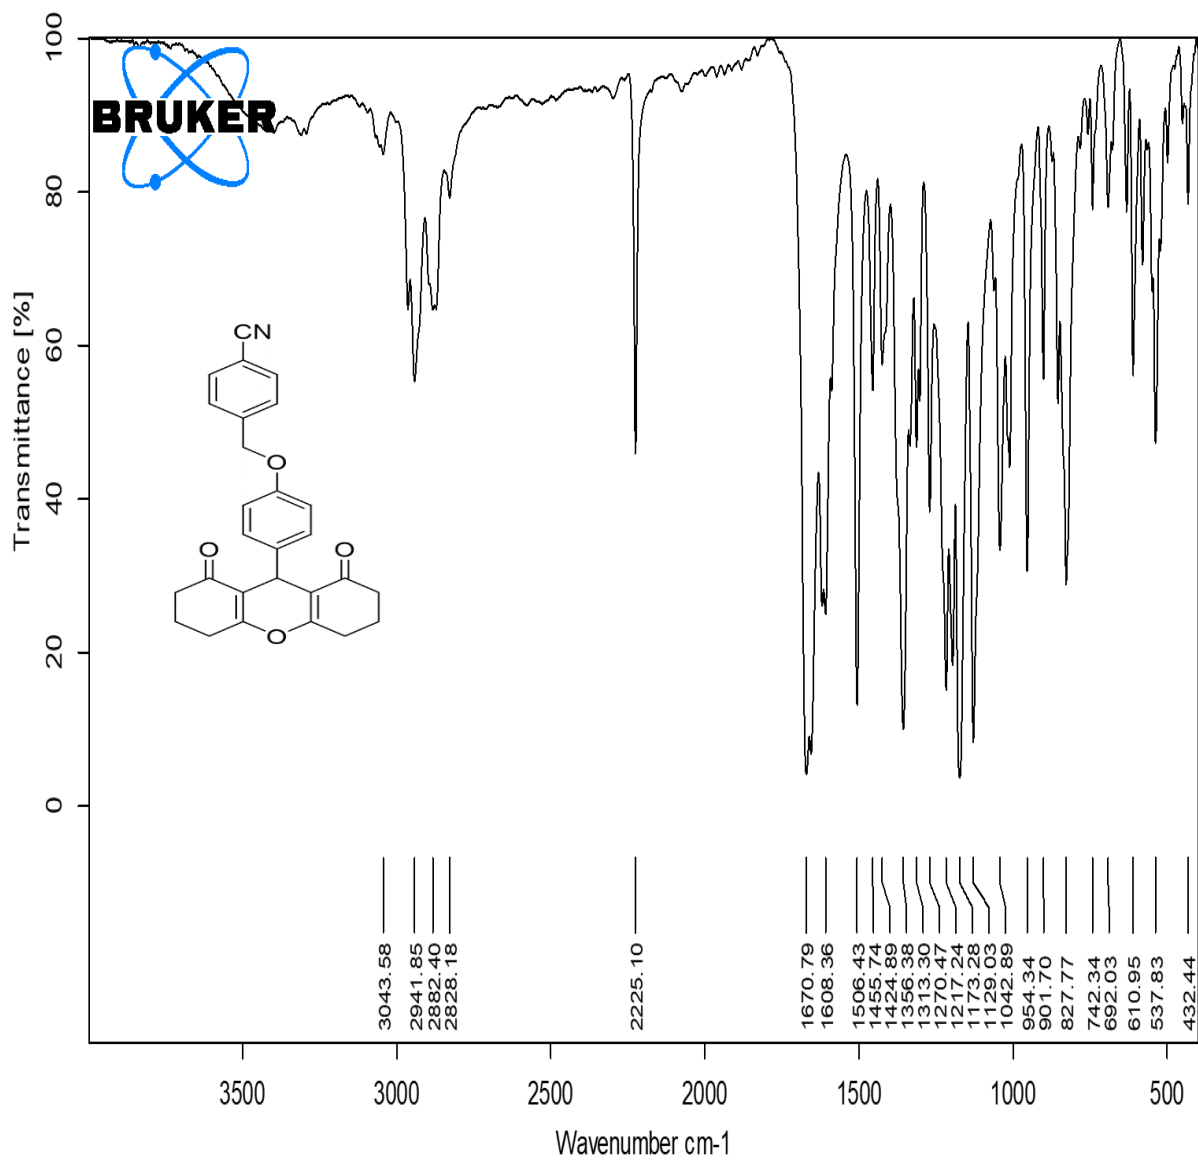

*IR spectrum of 4q*
